# Supplementary material for: Silylium cation initiated sergeants-and-soldiers type chiral amplification of helical aryl isocyanide copolymers
Source: Royal Society of Chemistry journal article supplement (doi:10.1039/d0py00808g), 2020-01-01
Supplement: d0py00808g1.pdf [file d0py00808g1.pdf]

## Silylium Cations Initiated Sergeants-and-Soldiers Type Chiral

### Amplification of Helical Aryl Isocyanide Copolymers

Hao Liu,<sup>a</sup> Shaowen Zhang,<sup>a</sup> Xiangqian Yan,<sup>a</sup> Chuang Song,<sup>a</sup> Jupeng Chen,<sup>a</sup> Yuping Dong<sup>\*b</sup> and Xiaofang Li<sup>\*a</sup>

#### Table of Contents

#### Experimental Section

#### Materials

#### General Method

**Scheme S1.** Synthesis of Silylium Cations.

**Scheme S2.** Synthesis of 2-isocyanonaphthalene (**NI**).

Synthesis of *N*-(naphthalen-2-yl)formamide (**2**)

Synthesis of 2-isocyanonaphthalene (**a**)

**Scheme S3.** Synthesis of ethyl 4-isocyanobenzoate (**EPI**).

Synthesis of ethyl 4-formamidobenzoate (**4**)

Synthesis of ethyl 4-isocyanobenzoate (**b**)

**Scheme S4.** Synthesis of isopropyl 3-isocyanobenzoate (**IPI**).

Synthesis of isopropyl 3-nitrobenzoate (**6**)

Synthesis of isopropyl 3-aminobenzoate (**7**)

Synthesis of isopropyl 3-formamidobenzoate (**8**)

Synthesis of isopropyl 3-isocyanobenzoate (**c**)

**Scheme S5.** Synthesis of (1*S*,2*R*,5*S*)-2-isopropyl-5-methylcyclohexyl 4-isocyanobenzoate (**D-IMCI**) and (1*R*,2*S*,5*R*)-2-isopropyl-5-methylcyclohexyl 4-isocyanobenzoate (**L-IMCI**).

Synthesis of (1*S*,2*R*,5*S*)-2-isopropyl-5-methylcyclohexyl 4-nitrobenzoate (**9**)

Synthesis of (1*S*,2*R*,5*S*)-2-isopropyl-5-methylcyclohexyl 4-aminobenzoate (**10**)

Synthesis of (1*S*,2*R*,5*S*)-2-isopropyl-5-methylcyclohexyl 4-formamidobenzoate (**11**)

Synthesis of (1*S*,2*R*,5*S*)-2-isopropyl-5-methylcyclohexyl 4-isocyanobenzoate (**d**)

Synthesis of (1*R*,2*S*,5*R*)-2-isopropyl-5-methylcyclohexyl 4-isocyanobenzoate (**e**)

**Scheme S6.** Synthesis of 4-isocyano-4'-(1,2,2-triphenylvinyl)-1,1'-biphenyl (**ITPB**).

Synthesis of (2-(4-bromophenyl)ethene-1,1,2-triyl)tribenzene (**14**)

Synthesis of (4-(1,2,2-triphenylvinyl)phenyl)boronic acid (**15**)

Synthesis of *N*-(4-iodophenyl)formamide (**16**)

Synthesis of *N*-(4'-(1,2,2-triphenylvinyl)-[1,1'-biphenyl]-4-yl)formamide (**17**)

Synthesis of 4-isocyano-4'-(1,2,2-triphenylvinyl)-1,1'-biphenyl (**f**)

**Scheme S7.** Synthesis of 9-bromononyl 4-nitrobenzoate (**BNB**).

Synthesis of 9-bromononyl 4-nitrobenzoate (**18**)

Synthesis of 9-bromononyl 4-formamidobenzoate (**19**)

Synthesis of 4-(5-phenylquinolin-7-yl)phenol (**22**)

Synthesis of 9-(4-(5-phenylquinolin-7-yl)phenoxy)nonyl 4-formamidobenzoate (**23**)

Synthesis of 9-(4-(5-phenylquinolin-7-yl)phenoxy)nonyl 4-isocyanobenzoate (**g**)

**Scheme S8.** Synthesis of 2-(4-isocyanophenyl)-4-phenylquinoline (**PQPI**).

Synthesis of 4-(4-phenylquinolin-2-yl)phenyl 4-nitrobenzoate (**24**)

Synthesis of 4-(4-phenylquinolin-2-yl)phenyl 4-formamidobenzoate (**25**)

---

Synthesis of 4-(4-phenylquinolin-2-yl)phenyl 4-isocyanobenzoate (**h**)

**Scheme S9.** Synthesis of 2-(4-isocyanophenyl)-4-phenylquinoline (**IPQ**).

Synthesis of 2-(4-nitrophenyl)-4-phenylquinoline (**27**)

Synthesis of *N*-(4-(4-phenylquinolin-2-yl)phenyl)formamide (**28**)

Synthesis of 2-(4-isocyanophenyl)-4-phenylquinoline (**i**)

**Scheme S10.** Synthesis of 9-(4-(2,2-bis(4-(diethylamino)phenyl)-1-phenylvinyl)-

phenoxy)nonyl 4-formamidobenzoate (**PPNI**)

Synthesis of 4,4'-(2-(4-methoxyphenyl)-2-phenylethene-1,1-diyl)bis(*N,N*-diethylaniline) (**31**)

Synthesis of 4-(2,2-bis(4-(diethylamino)phenyl)-1-phenylvinyl)phenol (**32**)

Synthesis of 9-(4-(2,2-bis(4-(diethylamino)phenyl)-1-phenylvinyl)phenoxy)nonyl 4-formamidobenzoate (**33**)

Synthesis of 9-(4-(2,2-bis(4-(diethylamino)phenyl)-1-phenylvinyl)phenoxy)nonyl 4-formamidobenzoate (**j**)

**Scheme S11.** Synthesis of (*E*)-1-(4-isocyanophenyl)-2-phenyldiazene (**IPD**).

Synthesis of (*E*)-4-(phenyldiazenyl)aniline (**35**)

Synthesis of (*E*)-*N*-(4-(phenyldiazenyl)phenyl)formamide (**36**)

Synthesis of (*E*)-1-(4-isocyanophenyl)-2-phenyldiazene(**k**)

**A typical procedure for the polymerization of 4-ethoxycarbonyl phenyl isocyanide (EPI) (Table 1, entry 3).**

**A typical procedure for the copolymerization of (1*S*,2*R*,5*S*)-2-isopropyl-5-methylcyclohexyl 4-isocyanobenzoate (D-IMCI) with 4-isocyano-4'-(1,2,2-triphenylvinyl)-1,1'-biphenyl (ITPB) (Table 2, entry 3).**

**Calculation the activity of catalyst.**

**Calculation of the IMCI contents of the copolymers.**

**Solvent separation experiments.**

**Figure S1.** Photos of poly(D/L-IMIC), poly(ITPB), poly(IPI), poly(IPD) copolymers (left), and the solubility of poly(D/L-IMIC), poly(ITPB), poly(IPI), poly(IPD), copolymers (right) in toluene.

**Calculation of the reactivity ratio of copolymerization.**

**<sup>1</sup>H NMR Spectra of catalyst, monomers and homopolymers.**

**Figure S2.** <sup>1</sup>H NMR spectrum of catalyst **1** in C<sub>6</sub>D<sub>5</sub>Cl at 25 °C.

**Figure S3.** <sup>13</sup>C NMR spectrum of catalyst **1** in C<sub>6</sub>D<sub>5</sub>Cl at 25 °C.

**Figure S4.** <sup>11</sup>B NMR spectrum of catalyst **1** in C<sub>6</sub>D<sub>5</sub>Cl at 25 °C.

**Figure S5.** <sup>29</sup>Si NMR spectrum of catalyst **1** in C<sub>6</sub>D<sub>5</sub>Cl at 25 °C.

**Figure S6.** <sup>1</sup>H NMR spectrum of 2-naphthyl isocyanide (**a**) in CDCl<sub>3</sub> at 25 °C.

**Figure S7.** <sup>1</sup>H NMR spectra of 4-ethoxycarbonyl phenyl isocyanide (**b**) in CDCl<sub>3</sub> at 25 °C.

**Figure S8.** <sup>1</sup>H NMR spectrum of 3-isopropoxyloxycarbonyl phenyl isocyanide (**c**) in CDCl<sub>3</sub> at 25 °C.

**Figure S9.** <sup>1</sup>H NMR spectrum of (1*S*,2*R*,5*S*)-2-isopropyl-5-methylcyclohexyl 4-isocyanobenzoate (**d**) in CDCl<sub>3</sub> at 25 °C.

**Figure S10.** <sup>1</sup>H NMR spectrum of (1*R*,2*S*,5*R*)-2-isopropyl-5-methylcyclohexyl 4-isocyanobenzoate (**e**) in CDCl<sub>3</sub> at 25 °C.

**Figure S11.** <sup>1</sup>H NMR spectrum of 4-isocyano-4'-(1,2,2-triphenylvinyl)-1,1'-biphenyl (**f**) in CDCl<sub>3</sub> at 25 °C.

**Figure S12.** <sup>1</sup>H NMR spectrum of 9-(4-(5-phenylquinolin-7-yl)phenoxy)nonyl 4-isocyanobenzoate (**g**) in CDCl<sub>3</sub> at 25 °C.

**Figure S13.** <sup>1</sup>H NMR spectrum of 4-(4-phenylquinolin-2-yl)phenyl 4-isocyanobenzoate (**h**) in CDCl<sub>3</sub> at 25 °C.

**Figure S14.** <sup>1</sup>H NMR spectrum of 2-(4-isocyanophenyl)-4-phenylquinoline(**i**) in CDCl<sub>3</sub> at 25 °C.

**Figure S15.** <sup>1</sup>H NMR spectrum of 9-(4-(2,2-bis(4-(diethylamino)phenyl)-1-phenylvinyl)phenoxy)nonyl 4-formamidobenzoate(**j**) in CDCl<sub>3</sub> at 25 °C.

**Figure S16.** <sup>1</sup>H NMR spectrum of (*E*)-1-(4-isocyanophenyl)-2-phenyldiazene(**k**) in CDCl<sub>3</sub> at 25 °C.

**Figure S17.** <sup>1</sup>H NMR spectrum of poly(EPI) in entry1, Table 1.

**Figure S18.**  $^1\text{H}$  NMR spectrum of poly(IPI) in entry 17, Table 1.

**Figure S19.**  $^1\text{H}$  NMR spectrum of poly(D-IMCI) in entry 18, Table 1.

**Figure S20.**  $^1\text{H}$  NMR spectrum of poly(L-IMCI) in entry 20, Table 1.

**Figure S21.**  $^1\text{H}$  NMR spectrum of poly(ITPB) in entry 22, Table 1.

**Figure S22.**  $^1\text{H}$  NMR spectrum of poly(BNB) in entry 24, Table 1.

**Figure S23.**  $^1\text{H}$  NMR spectrum of poly(PQPI) in entry 25, Table 1.

**Figure S24.**  $^1\text{H}$  NMR spectrum of poly(IPQ) in entry 26, Table 1.

**Figure S25.**  $^1\text{H}$  NMR spectrum of poly(IPD) in entry 28 Table 1.

**Figure S26.** FT-IR spectra of isocyanide monomers EPI (b), IPI (c), D/L-IMCI (d/e), ITPB (f), BNB (g), PQPI (h), IPQ (i), IPD (j).

**Figure S27.** FT-IR spectra of poly(EPI) (Table 1, entry 1), poly(IPI) (Table 1, entry 17), poly(D-IMCI) (Table 1, entry 18), poly(L-IMCI) (Table 1, entry 20), poly(ITPB) (Table 1, entry 22), poly(BNB) (Table 1, entry 24), poly(PQPI) (Table 1, entry 25), poly(IPQ) (Table 1, entry 26), poly(IPD) (Table 1, entry 28).

**Figure S28.** Fluorescence spectra and UV absorption-transmittance spectra of ITPB monomer (excitation wavelength: 325 nm; 0.004 mg/ml) in THF/water mixture.

**Figure S29.** UV absorption and transmittance spectra of poly(ITPB) (Table 1, entry 20) (0.004 mg/ml) in THF/water mixture.

**Figure S30.** Dynamic light scattering measurement of ITPB at 0 % water fraction in THF/water mixture (left side) and at 95 % water fraction in THF/water mixture (right side).

**Figure S31.** Dynamic light scattering measurement of poly(ITPB) at 0 % water fraction in THF/water mixture (left side) and at 70 % water fraction in THF/water mixture (right side).

**Figure S32.** Dynamic light scattering measurement of poly(D-IMCI-co-ITPB) (Table 2, entry 2) at 0 % water fraction in THF/water mixture (left side) and at 70% water fraction in THF/water mixture (right side).

**Figure S32.** Dynamic light scattering measurement of poly(L-IMCI-co-ITPB) (Table 2, entry 8) at 0 % water fraction in THF/water mixture (left side) and at 70% water fraction in THF/water mixture (right side).

**Figure S34.** Fluorescence intensity of DPQ unit, poly(BNB), poly(PQPI), poly(IPQ) (repeat unit  $10^{-5}$  M) in THF.

**Figure S35.** A plot of fluorescence intensity as a function of the iron concentration ( $5 \times 10^{-7}$ – $4.5 \times 10^{-6}$  M) in THF.

**Figure S36 (A)** Fluorescence spectra of poly(BNB) (Table 1, entry 24) ( $10^{-5}$  M repeat unit) in the absence (blank) and presence of different metal salts ( $10^{-5}$  M) in MeOH; (B) Fluorescence emission of poly(BNB) ( $10^{-5}$  M repeat unit) in MeOH with  $\text{Al}^{3+}$ ,  $\text{Cr}^{3+}$ ,  $\text{Fe}^{3+}$ , and  $\text{Fe}^{2+}$  ( $10^{-5}$  M), respectively, under UV lamp irradiation.

**Figure S37.** UV absorption spectra of poly(BNB) ( $10^{-5}$  M) and poly(BNB) ( $10^{-5}$  M) with different metal iron ( $10^{-5}$  M) in MeOH(left) and THF(right).

**Figure S38.** FT-IR spectra of NI oligomer obtained by  $[(\text{Et}_3\text{Si})_2\text{H}][\text{B}(\text{C}_6\text{F}_5)_4]$ .

**Figure S39.**  $^1\text{H}$  NMR spectra of poly(D-IMCI), poly(ITPB) and poly(D-IMCI-co-ITPB)s and (Table 1, entries 18, 22 and Table 2, entries 1-5).

**Figure S40.**  $^1\text{H}$  NMR spectra of poly(L-IMCI), poly(ITPB) and poly(L-IMCI-co-ITPB)s (Table 1, entries 20, 22 and Table 2, entries 6-10).

**Figure S41.** Fluorescence spectra of poly(D/L-IMCI-co-ITPB) (table 2, entry 1-10) in THF/water mixture (excitation wavelength: 220 nm; copolymer: A (Table 2, entry 1), B (Table 2, entry 2), F (Table 2, entry 6), G (Table 2, entry 7): 0.005 mg/ml; C (Table 2, entry 3), H (Table 2, entry 8): 0.0065 mg/ml; D (Table 2, entry 4), I (Table 2, entry 9): 0.010 mg/ml; E (Table 2, entry 5), J (Table 2, entry 10): 0.015 mg/ml).

**Figure S42.** UV absorption and transmittance spectra of poly(D/L-IMCI-co-ITPB) (table 2, entry 1-10) in THF/water mixture (copolymer: A (Table 2, entry 1), B (Table 2, entry 2), F (Table 2, entry 6), G (Table 2, entry 7): 0.005 mg/ml; C (Table 2, entry 3), H (Table 2, entry 8): 0.0065 mg/ml; D (Table 2, entry 4), I (Table 2, entry 9): 0.010 mg/ml; E

---

(Table 2, entry 5), J (Table 2, entry 10): 0.015 mg/ml).

**Figure S43.**  $^1\text{H}$  NMR spectra of poly(IPI), poly(D-IMCI) and poly(D-IMCI-co-IPI)s (Table 1, entries 17, 18 and Table 2, entries 11-15).

**Figure S44.**  $^1\text{H}$  NMR spectra of poly(IPI), poly(L-IMCI) and poly(L-IMCI-co-IPI)s (Table 1, entries 17, 20 and Table 2, entries 16-20).

**Figure S45.**  $^1\text{H}$  NMR spectra of poly(D-IMCI), poly(IPD) and poly(D-IMIC-co-IPD)s (Table 1, entries 18, 28 and Table 2, entries 21-25).

**Figure S46.**  $^1\text{H}$  NMR spectra of poly(L-IMCI), poly(IPD) and poly(L-IMIC-co-IPD)s (Table 1, entries 20, 28 and Table 2, entries 26-30).

**Figure S47.**  $^1\text{H}$  NMR spectra of poly(L-IMCI), poly(EPI) and poly(L-IMIC-co-EPI)s (Table 1, entries 20, 1 and Table 2, entries 31-35).

**Figure S48.** GPC curve of poly(EPI) in Table 1, entry 1.

**Figure S49.** GPC curve of poly(EPI) in Table 1, entry 2.

**Figure S50.** GPC curve of poly(EPI) in Table 1, entry 3.

**Figure S51.** GPC curve of poly(EPI) in Table 1, entry 4.

**Figure S52.** GPC curve of poly(EPI) in Table 1, entry 5.

**Figure S53.** GPC curve of poly(EPI) in Table 1, entry 6.

**Figure S54.** GPC curve of poly(EPI) in Table 1, entry 7.

**Figure S55.** GPC curve of poly(EPI) in Table 1, entry 8.

**Figure S56.** GPC curve of poly(EPI) in Table 1, entry 9.

**Figure S57.** GPC curve of poly(EPI) in Table 1, entry 10.

**Figure S58.** GPC curve of poly(EPI) in Table 1, entry 11.

**Figure S59.** GPC curve of poly(EPI) in Table 1, entry 12.

**Figure S60.** GPC curve of poly(EPI) in Table 1, entry 13.

**Figure S61.** GPC curve of poly(EPI) in Table 1, entry 14.

**Figure S62.** GPC curve of poly(EPI) in Table 1, entry 15.

**Figure S63.** GPC curve of poly(IPI) in Table 1, entry 17.

**Figure S64.** GPC curve of poly(D-IMIC) in Table 1, entry 18.

**Figure S65.** GPC curve of poly(D-IMIC) in Table 1, entry 19.

**Figure S66.** GPC curve of poly(L-IMIC) in Table 1, entry 20.

**Figure S67.** GPC curve of poly(L-IMIC) in Table 1, entry 21.

**Figure S68.** GPC curve of poly(ITPB) in Table 1, entry 22.

**Figure S69.** GPC curve of poly(ITPB) in Table 1, entry 23.

**Figure S70.** GPC curve of poly(BNB) in Table 1, entry 24.

**Figure S71.** GPC curve of poly(PQPI) in Table 1, entry 25.

**Figure S72.** GPC curve of poly(IPQ) in Table 1, entry 26.

**Figure S73.** GPC curve of poly(IPD) in Table 1, entry 28.

**Figure S74.** GPC curve of poly(IPD) in Table 1, entry 29.

**Figure S75.** GPC curve of poly(ITPB-co-D-IMCI) in Table 2, entry 1.

**Figure S76.** GPC curve of poly(ITPB-co-D-IMCI) in Table 2, entry 2.

**Figure S77.** GPC curve of poly(ITPB-co-D-IMCI) in Table 2, entry 3.

**Figure S78.** GPC curve of poly(ITPB-co-D-IMCI) in Table 2, entry 4.

**Figure S79.** GPC curve of poly(ITPB-co-D-IMCI) in Table 2, entry 5.

**Figure S80.** GPC curve of poly(ITPB-co-L-IMCI) in Table 2, entry 6.

---

**Figure S81.** GPC curve of poly(ITPB-co-L-IMCI) in Table 2, entry 7.

**Figure S82.** GPC curve of poly(ITPB-co-L-IMCI) in Table 2, entry 8.

**Figure S83.** GPC curve of poly(ITPB-co-L-IMCI) in Table 2, entry 9.

**Figure S84.** GPC curve of poly(ITPB-co-L-IMCI) in Table 2, entry 10.

**Figure S85.** GPC curve of poly(IPI-co-D-IMCI) in Table 2, entry 11.

**Figure S86.** GPC curve of poly(IPI-co-D-IMCI) in Table 2, entry 12.

**Figure S87.** GPC curve of poly(IPI-co-D-IMCI) in Table 2, entry 13.

**Figure S88.** GPC curve of poly(IPI-co-D-IMCI) in Table 2, entry 14.

**Figure S89.** GPC curve of poly(IPI-co-D-IMCI) in Table 2, entry 15.

**Figure S90.** GPC curve of poly(IPI-co-L-IMCI) in Table 2, entry 16.

**Figure S91.** GPC curve of poly(IPI-co-L-IMCI) in Table 2, entry 17.

**Figure S92.** GPC curve of poly(IPI-co-L-IMCI) in Table 2, entry 18.

**Figure S93.** GPC curve of poly(IPI-co-L-IMCI) in Table 2, entry 19.

**Figure S94.** GPC curve of poly(IPI-co-L-IMCI) in Table 2, entry 20.

**Figure S95.** GPC curve of poly(IPD-co-D-IMCI) in Table 2, entry 21.

**Figure S96.** GPC curve of poly(IPD-co-D-IMCI) in Table 2, entry 22.

**Figure S97.** GPC curve of poly(IPD-co-D-IMCI) in Table 2, entry 23.

**Figure S98.** GPC curve of poly(IPD-co-D-IMCI) in Table 2, entry 24.

**Figure S99.** GPC curve of poly(IPD-co-D-IMCI) in Table 2, entry 25.

**Figure S100.** GPC curve of poly(IPD-co-L-IMCI) in Table 2, entry 26.

**Figure S101.** GPC curve of poly(IPD-co-L-IMCI) in Table 2, entry 27.

**Figure S102.** GPC curve of poly(IPD-co-L-IMCI) in Table 2, entry 28.

**Figure S103.** GPC curve of poly(IPD-co-L-IMCI) in Table 2, entry 29.

**Figure S104.** GPC curve of poly(IPD-co-L-IMCI) in Table 2, entry 30.

**Figure S105.** GPC curve of poly(EPI-co-L-IMCI) in Table 2, entry 31.

**Figure S106.** GPC curve of poly(EPI-co-L-IMCI) in Table 2, entry 32.

**Figure S107.** GPC curve of poly(EPI-co-L-IMCI) in Table 2, entry 33.

**Figure S108.** GPC curve of poly(EPI-co-L-IMCI) in Table 2, entry 34.

**Figure S109.** GPC curve of poly(EPI-co-L-IMCI) in Table 2, entry 35.

**Figure S110.** TGA spectrum of PEPI obtained by  $[(Et_3Si)_2H]^+[B(C_6F_5)_4]^-$  (Measure condition: Temperature range: 0-1000°C, Temp. Rate: 10 °C/min, Atmosphere: Air, Gas Flow: 50 [ml/min]).

**Figure S111.** TGA spectrum of PEPI obtained by  $(Et_2-(S,S)-BOZ)PdC\equiv CC_6H_5$  (Measure condition: Temperature range: 0-1000°C, Temp. Rate: 10 °C/min, Atmosphere: Air, Gas Flow: 50 [ml/min]).

## References

## EXPERIMENTAL SECTION

### Materials

All manipulations of air and moisture-sensitive compounds were performed under a dry and oxygen-free nitrogen atmosphere by using Schlenk techniques or under a nitrogen atmosphere in an Mbraun glove box. Nitrogen (Beijing AP Beifen Gases Industrial Co., Ltd.) was purified by passing through a Dryclean column (4A molecular sieves, Dalian Replete Science And Technology Co., Ltd.) and a Gasclean column (Dalian Replete Science And Technology Co., Ltd.). The nitrogen in the glovebox was constantly circulated through a copper/molecular sieves catalyst unit. The oxygen and moisture concentrations in the glovebox atmosphere were monitored by an O<sub>2</sub>/H<sub>2</sub>O Combi-Analyzer (Mbraun) to ensure both were always below 0.1 ppm. Anhydrous THF, hexane and toluene were purified by a solvent purification system (SPS-800, Mbraun), and dried over fresh Na chips in the glovebox. [Ph<sub>3</sub>C]<sup>+</sup>[B(C<sub>6</sub>F<sub>5</sub>)<sub>4</sub>]<sup>-</sup> was purchased from Tosoh Finechem Corporation and used without purification. Et<sub>3</sub>SiH was purchased from Aldrich and used as received. The catalyst and the isocyanide monomers were synthesized according to literatures. The deuterated solvents chloroform-d<sub>1</sub> (99.8 atom% D) and Chlorobenzene-d<sub>5</sub> (99.6 atom% D) were obtained from Cambridge Isotope.

### General Method

<sup>1</sup>H, <sup>29</sup>Si, <sup>11</sup>B, and <sup>13</sup>C NMR spectra were recorded on a Bruker Avance (III)-HD 400 MHz, 700MHz) spectrometer. The molecular weights and the molecular weight distributions of the EPI polymers and poly(L-IMCI-co-EPI)s were determined against polystyrene standard at 25 °C by GPC on a Waters HPLC-515 apparatus, CHCl<sub>3</sub> was employed as the eluent at a flow rate of 1 mL/min. The molecular weights and the molecular weight distributions of copolymers were determined against polystyrene standard at 25 °C by GPC on a Waters HLC-8320GPC apparatus, THF was used as the eluent at a flow rate of 1 mL/min. FT-IR spectra were recorded on a Thermo IS5 FT-IR system using KBr pellets at room temperature. The UV-Vis spectra were recorded on a TU-1901 double beam UV-vis spectrophotometer, and the fluorescence spectra were recorded on a HITACHI F-7000 fluorescence spectrophotometer. Quartz cells with 10.0 mm length were used in UV-Vis and fluorescence measurement, and the slit widths were set at 5.0 (or 2.5) nm for both excitation and emission during the fluorescence measurement. Circular dichroism spectra were collected on a Jasco J-810 and the quartz cell length is 1.0 mm. The dynamic light scattering measurement were tested by Zetasizer Nano. The thermogravimetric analysis (TGA) spectra were tested by DTG-60 spectrometer.

### Scheme S1. Synthesis of silylium cations

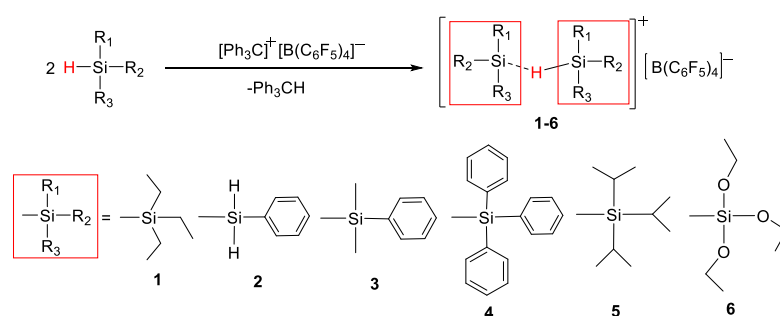

**Synthesis of silylium cations 1-6:** **1** was used as an example: Under nitrogen atmosphere, [Ph<sub>3</sub>C]<sup>+</sup>[B(C<sub>6</sub>F<sub>5</sub>)<sub>4</sub>]<sup>-</sup> (0.2 g, 0.22 mmol) was added to a small vial. An excess of triethylsilane (1.5 mL) was added to the [Ph<sub>3</sub>C]<sup>+</sup>[B(C<sub>6</sub>F<sub>5</sub>)<sub>4</sub>]<sup>-</sup> solid and stirred for 48 h.<sup>1</sup> The yellow solid was replaced with a white solid, which was washed several times with pentane, dried under vacuum to give [(Et<sub>3</sub>Si)<sub>2</sub>H]<sup>+</sup>[B(C<sub>6</sub>F<sub>5</sub>)<sub>4</sub>]<sup>-</sup> (**1**), stored in a freezer in the glovebox. Yield: 0.15 g (90 %). <sup>1</sup>H NMR (400 MHz, C<sub>6</sub>D<sub>5</sub>Cl) δ 2.20 (s, 1H), 0.85 – 0.61 (m, 47H); <sup>29</sup>Si NMR (700 MHz, C<sub>6</sub>D<sub>5</sub>Cl) δ 58.54; <sup>11</sup>B NMR (700 MHz, C<sub>6</sub>D<sub>5</sub>Cl) δ 16.00; <sup>13</sup>C NMR (700 MHz, C<sub>6</sub>D<sub>5</sub>Cl) δ 5.86, 5.53, 5.25, 4.97. Catalysts **2-6** are synthesized in the same way as **1**. **5**: <sup>29</sup>Si NMR (700 MHz, C<sub>6</sub>D<sub>6</sub>) δ 105.51.

### Scheme S2. Synthesis of 2-isocyanonaphthalene (NI)

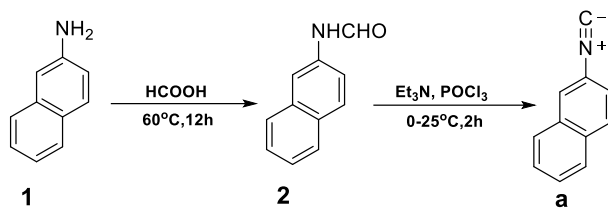

**Synthesis of N-(naphthalen-2-yl)formamide (2)** Compound **1** (1.0 g, 7.0 mmol) was dissolved in formic acid (10 mL), the resulting mixture was heated to 60°C for 12 h. After the reaction mixture was cooled to room temperature, the solvents were removed under reduced pressure. The residue was dissolved in DCM (20 mL) and the solution was washed with saturated aqueous Na<sub>2</sub>CO<sub>3</sub> (2×20 mL). The separated organic phase was dried over anhydrous Na<sub>2</sub>SO<sub>4</sub>, concentrated under reduced pressure to afford compound **2** as a red solid (crude product).

**Synthesis of 2-isocyanonaphthalene (a)** Compound **2** (1 g, crude product) and triethylamine (5 mL) were dissolved in dry DCM (20 mL) under an atmosphere of nitrogen, after the mixture was cooled to 0 °C, POCl<sub>3</sub> (1.2 mL) was added dropwise to the mixture, the resulting mixture was slowly warm to room temperature and stirred for 2 h, then the reaction mixture was slowly poured into 50 mL saturated aqueous Na<sub>2</sub>CO<sub>3</sub> and stirred at room temperature for 0.5 h, the mixture was extracted with DCM (3 × 50 mL), the combined organic layers were washed with brine, dried over anhydrous Na<sub>2</sub>SO<sub>4</sub> and concentrated under reduced pressure, the residue was purified by column chromatography (neutral Al<sub>2</sub>O<sub>3</sub>, 10:1 hexane to ethyl acetate, v/v) to afford compound **a** as a white solid (0.69 g, 78 % yield). <sup>1</sup>H NMR (400 MHz, CDCl<sub>3</sub>) δ 7.85 (ddd, *J* = 9.7, 9.1, 4.9 Hz, 4H), 7.61 – 7.53 (m, 2H), 7.42 (dd, *J* = 8.7, 1.6 Hz, 1H).

**Scheme S3. Synthesis of ethyl 4-isocyanobenzoate (EPI)**

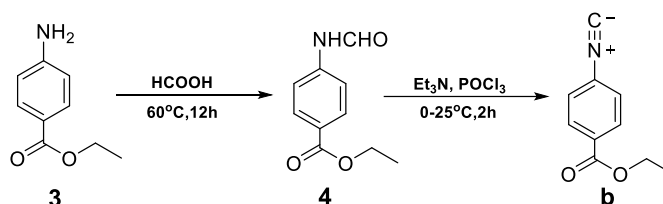

**Synthesis of ethyl 4-formamidobenzoate (4)** The synthetic procedure was the same with that of compound **2** (crude product).

**Synthesis of ethyl 4-isocyanobenzoate (b)** The synthetic procedure was the same with that of compound **a**. (a brown solid, 73 % yield). <sup>1</sup>H NMR (400 MHz, CDCl<sub>3</sub>) δ 8.11 – 8.06 (m, 2H), 7.44 (d, *J* = 8.5 Hz, 2H), 4.39 (q, *J* = 7.1 Hz, 2H), 1.40 (t, *J* = 7.1 Hz, 3H).

**Scheme S4. Synthesis of isopropyl 3-isocyanobenzoate (IPI)**

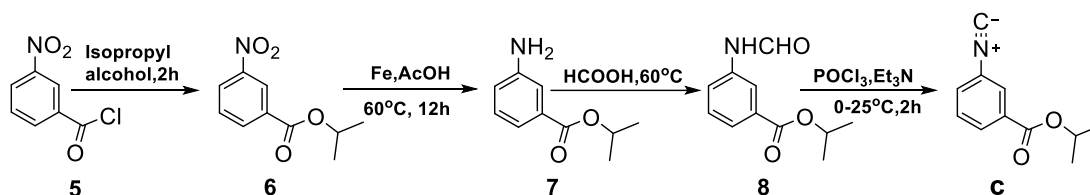

**Synthesis of isopropyl 3-nitrobenzoate (6)** To a mixture of Isopropanol (4 mL) and Et<sub>3</sub>N (5.2 mL) was slowly added a solution of 3-nitrobenzoyl chloride (7.0 g, 37.0 mmol) in 50 mL DCM at nitrogen atmosphere and the resulting mixture was stirred at room temperature for 2 h. Then the solvents were removed under reduced pressure and the residue was dissolved in dichloromethane (30 mL). The solution was washed with saturated Na<sub>2</sub>CO<sub>3</sub> aqueous solution and brine, the separated organic layer was dried over anhydrous Na<sub>2</sub>SO<sub>4</sub> and concentrated under reduced pressure, the residue was purified by column chromatography (silica gel, 10:1 hexane to ethyl acetate, v/v) to afford

the desired compound **6** as a white solid (2.40 g, 81 % yield)  $^1\text{H}$  NMR (400 MHz,  $\text{CDCl}_3$ )  $\delta$  8.77 – 8.70 (m, 1H), 8.34 – 8.24 (m, 2H), 7.57 (t,  $J$  = 8.0 Hz, 1H), 5.22 (dq,  $J$  = 12.6, 6.3 Hz, 1H), 1.33 (d,  $J$  = 6.3 Hz, 6H).

**Synthesis of isopropyl 3-aminobenzoate (7)** Under nitrogen atmosphere, compound **6** (7.5 g, 42mmol) was dissolved in 30 ml of acetic acid, then iron powder (23.5g, 430 mmol) was added in one portion, the resulting mixture was stirred at 70°C overnight. Then the mixture was filtered and the filter cake was washed with ethyl acetate (50 mL), the filtrate was concentrated under reduced pressure, the residue was purified by column chromatography (silica gel, 4:1 hexane to ethyl acetate, v/v) to afford the desired compound **7** as a yellow oil (3.5 g, 51 % yield).  $^1\text{H}$  NMR (400 MHz,  $\text{CDCl}_3$ )  $\delta$  8.77 – 8.70 (m, 1H), 8.34 – 8.24 (m, 2H), 7.57 (t,  $J$  = 8.0 Hz, 1H), 5.22 (dq,  $J$  = 12.6, 6.3 Hz, 1H), 1.33 (d,  $J$  = 6.3 Hz, 6H).

**Synthesis of isopropyl 3-formamidobenzoate (8)** The synthetic procedure was the same with that of compound **2** (crude product).

**Synthesis of isopropyl 3-isocyanobenzoate (c)** The synthetic procedure was the same with that of compound **a**. (a brown oil, 64 % yield).  $^1\text{H}$  NMR (400 MHz,  $\text{CDCl}_3$ )  $\delta$  8.77 – 8.70 (m, 1H), 8.34 – 8.24 (m, 2H), 7.57 (t,  $J$  = 8.0 Hz, 1H), 5.22 (dq,  $J$  = 12.6, 6.3 Hz, 1H), 1.33 (d,  $J$  = 6.3 Hz, 6H).

**Scheme S5. Synthesis of (1S,2R,5S)-2-isopropyl-5-methylcyclohexyl 4-isocyanobenzoate (D-IMCI) and (1R,2S,5R)-2-isopropyl-5-methylcyclohexyl 4-isocyanobenzoate (L-IMCI)**

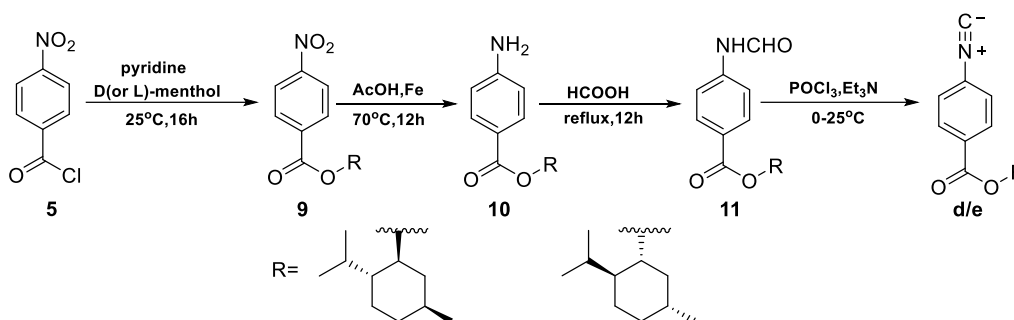

**Synthesis of (1S,2R,5S)-2-isopropyl-5-methylcyclohexyl 4-nitrobenzoate (9)** Under nitrogen atmosphere, 4-nitrobenzoyl chloride (1.8 g, 9.7 mmol) was dissolved in dry pyridine (20 mL), then D-menthol (1.5 g, 9.7 mmol) was added in one portion and the resulting mixture was stirred at room temperature for 16 h, after removal of pyridine under reduced pressure, the residue was dissolved in dichloromethane (30 mL) and washed with 1 N HCl, saturated  $\text{NaHCO}_3$  aqueous solution and brine, the separated organic layer was dried over anhydrous  $\text{Na}_2\text{SO}_4$  and concentrated under reduced pressure, the residue was purified by column chromatography (silica gel, 10:1 hexane to ethyl acetate, v/v) to afford the desired compound **9** as a white solid (2.0 g, 68 % yield).  $^1\text{H}$  NMR (400 MHz,  $\text{CDCl}_3$ ):  $\delta$  0.79 (d,  $J$  = 7.2 Hz, 3H), 0.93 (t,  $J$  = 6.4 Hz, 6H), 0.88-0.98 (m, 1H), 1.08-1.17 (m, 2H), 1.54-1.62 (m, 2H), 1.74 (d,  $J$  = 12.4 Hz, 2H), 1.88-1.95 (m, 1H), 2.12 (d,  $J$  = 11.6 Hz, 1H), 4.97 (dt,  $J$  = 4.4, 11.2 Hz, 1H), 8.20 (d,  $J$  = 8.8 Hz, 2H), 8.28 (d,  $J$  = 8.4 Hz, 2H).

**Synthesis of (1S,2R,5S)-2-isopropyl-5-methylcyclohexyl 4-aminobenzoate (10)** The synthetic procedure was the same with that of compound **7**. (a yellow oil, 50 % yield).  $^1\text{H}$  NMR (400 MHz,  $\text{CDCl}_3$ )  $\delta$  7.85 (d,  $J$  = 8.6 Hz, 2H), 6.64 (d,  $J$  = 8.6 Hz, 2H), 4.95 – 4.73 (m, 1H), 4.03 (s, 2H), 2.11 (d,  $J$  = 11.5 Hz, 1H), 1.95 (ddd,  $J$  = 13.9, 7.0, 2.7 Hz, 1H), 1.77 – 1.67 (m, 2H), 1.52 (ddd,  $J$  = 13.9, 6.0, 3.0 Hz, 2H), 1.10 (ddd,  $J$  = 35.1, 18.0, 11.1 Hz, 2H), 0.91 (dd,  $J$  = 6.8, 3.8 Hz, 7H), 0.78 (d,  $J$  = 6.9 Hz, 3H).

**Synthesis of (1S,2R,5S)-2-isopropyl-5-methylcyclohexyl 4-formamidobenzoate (11)** The synthetic procedure was the same with that of compound **2** (a yellow oil, crude product).

**Synthesis of (1S,2R,5S)-2-isopropyl-5-methylcyclohexyl 4-isocyanobenzoate (d)** The synthetic procedure was the same with that of compound **a**. (a brown solid, 75 % yield).  $^1\text{H}$  NMR (400 MHz,  $\text{CDCl}_3$ )  $\delta$  8.11 – 8.06 (m, 2H), 7.44 (d,  $J$  = 8.6 Hz, 2H), 4.94 (td,  $J$  = 10.9, 4.4 Hz, 1H), 2.21 – 2.04 (m, 1H), 2.00 – 1.83 (m, 1H), 1.74 (dt,  $J$  = 5.0, 3.0 Hz,



2H), 1.65 – 1.47 (m, 2H), 1.17 – 1.05 (m, 2H), 0.99 – 0.87 (m, 7H), 0.79 (d,  $J = 7.0$  Hz, 3H).

**Synthesis of (1*R*,2*S*,5*R*)-2-isopropyl-5-methylcyclohexyl 4-isocyanobenzoate (e)** The synthesis of (1*R*,2*S*,5*R*)-2-isopropyl-5-methylcyclohexyl 4-isocyanobenzoate (**e**) was the same with that of (1*S*,2*R*,5*S*)-2-isopropyl-5-methylcyclohexyl 4-isocyanobenzoate (**d**).  $^1\text{H}$  NMR (400 MHz,  $\text{CDCl}_3$ )  $\delta$  8.11 – 8.04 (m, 2H), 7.44 (d,  $J = 8.6$  Hz, 2H), 4.94 (td,  $J = 10.9, 4.4$  Hz, 1H), 2.17 – 2.06 (m, 1H), 1.91 (dtd,  $J = 13.9, 7.0, 2.7$  Hz, 1H), 1.79 – 1.69 (m, 2H), 1.62 – 1.50 (m, 2H), 1.21 – 1.03 (m, 2H), 1.00 – 0.85 (m, 7H), 0.79 (d,  $J = 7.0$  Hz, 3H).

**Scheme S6. Synthesis of 4-isocyano-4'-(1,2,2-triphenylvinyl)-1,1'-biphenyl (ITPB)**

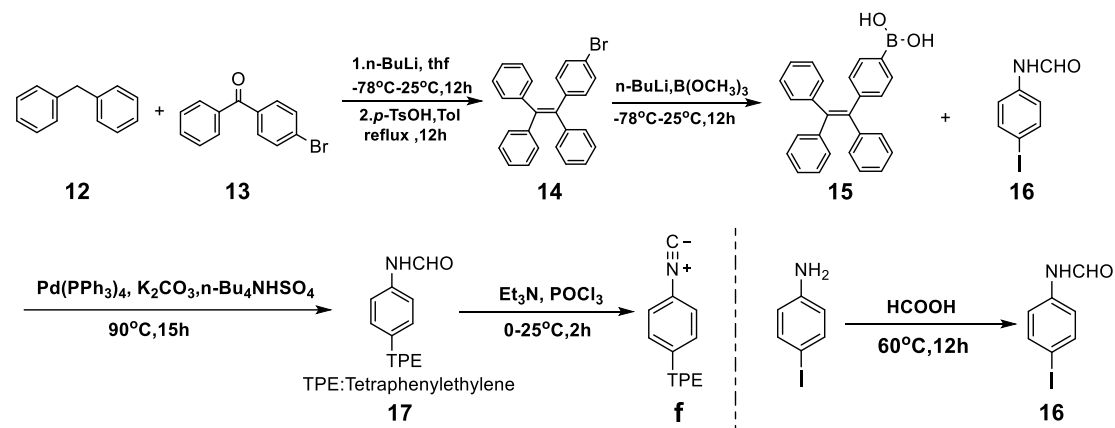

**Synthesis of (2-(4-bromophenyl)ethene-1,1,2-triyl)tribenzene (14)** Under nitrogen atmosphere, diphenylmethane (8.60 g, 51 mmol) was dissolved in 50 mL of dry THF, after the solution was cooled to  $-78^\circ\text{C}$ ,  $n\text{-BuLi}$  (35 mL, 1.6 M in hexane) was added dropwise and the resulting mixture was stirred at  $-10^\circ\text{C}$  for 2 h, then (4-bromophenyl)(phenyl)methanone (11.1 g, 42.4 mmol) was added dropwise and the mixture was allowed to warmed to room temperature and stirred for 10 h. Then the reaction mixture was quenched with an aqueous solution of ammonium chloride, extracted with DCM (3×100 mL), the combined organic layers were dried over anhydrous  $\text{Na}_2\text{SO}_4$  and evaporated to remove the solvent. The residue was dissolved in toluene (100 mL),  $p$ -toluene sulfonic acid (1.06 g, 6.20 mmol) was added, the resulting mixture was refluxed for 12 h. after the reaction mixture was cooled to room temperature, the solvent was removed under reduced pressure, the residue was purified by column chromatography (silica gel, 20:1 hexane to ethyl acetate, v/v) to afford the desired compound **14** as a white solid (12.7 g, 73 % yield).  $^1\text{H}$  NMR (400 MHz,  $\text{CDCl}_3$ )  $\delta$  7.22 (d,  $J = 8.5$  Hz, 2H), 7.16 – 7.08 (m, 9H), 7.02 (qd,  $J = 6.2, 2.6$  Hz, 6H), 6.92 – 6.87 (m, 2H).

**Synthesis of (4-(1,2,2-triphenylvinyl)phenyl)boronic acid (15)** Under nitrogen atmosphere, compound **14** (12.7 g, 31.0 mmol) was dissolved in 20 mL of dry THF, after the solution was cooled to  $-78^\circ\text{C}$ ,  $n\text{-BuLi}$  (25 mL, 2.4 M in hexane) was added dropwise and the mixture was stirred at  $-78^\circ\text{C}$  for 30 min. Then a solution of trimethyl borate (18 mL) in dry THF (10 mL) was added dropwise, the resulting mixture was stirred at  $-78^\circ\text{C}$  for 2h, then allowed to warm to room temperature and stirred overnight. The reaction mixture was quenched with 10 % hydrogen chloride aqueous solution, extracted with ethyl acetate (3 × 30 mL), the combined organic layers were dried over anhydrous  $\text{Na}_2\text{SO}_4$  and concentrated under reduced pressure to afford crude compound **15** as white solid (6.8 g, crude product), this compound was used directly for the next step without purification.

**Synthesis of *N*-(4-iodophenyl)formamide (16)** The synthetic procedure was the same with that of compound **2** (a brown solid, crude product).

**Synthesis of *N*-(4'-(1,2,2-triphenylvinyl)-[1,1'-biphenyl]-4-yl)formamide (17)** Under nitrogen atmosphere, compound **15** (6.8 g, crude product), compound **16** (4.5 g, crude product) were dissolved in a mixture solvents of toluene (100 mL) and water (50 mL), then  $\text{Pd}(\text{PPh}_3)_4$  (410 mg, 0.33 mmol),  $\text{K}_2\text{CO}_3$  (3.10g, 22.4mmol) and tetrabutylammonium hydrogen sulfate (510 mg, 1.5 mmol) were added, the resulting mixture was stirred at  $90^\circ\text{C}$

for 15 h. after the reaction mixture was cooled to room temperature, the organic layer was separated and the aqueous phase was extracted with ethyl acetate (3 × 80 mL), the combined organic layers were dried over anhydrous Na<sub>2</sub>SO<sub>4</sub> and concentrated under reduced pressure, the residue was purified by column chromatography (silica gel, 2:1 hexane: ethyl acetate, v/v) to afford the desired compound **17** as a light yellow solid (5.1 g, 63 % yield). <sup>1</sup>H NMR (400 MHz, CDCl<sub>3</sub>) δ 8.71 (d, *J* = 11.4 Hz, 1H), 8.39 (d, *J* = 1.3 Hz, 1H), 7.60 – 7.49 (m, 3H), 7.35 – 7.29 (m, 2H), 7.22 – 6.98 (m, 18H).

**Synthesis of 4-isocyano-4'-(1,2,2-triphenylvinyl)-1,1'-biphenyl (f)** The synthetic procedure was the same with that of compound **a** (a green solid 0.7 g, 75 % yield). <sup>1</sup>H NMR (400 MHz, CDCl<sub>3</sub>) δ 7.56 (d, *J* = 8.5 Hz, 2H), 7.40 (d, *J* = 8.5 Hz, 2H), 7.31 (d, *J* = 8.3 Hz, 2H), 7.15 – 7.02 (m, 17H).

**Scheme S7. Synthesis of 9-bromononyl 4-nitrobenzoate (BNB)**

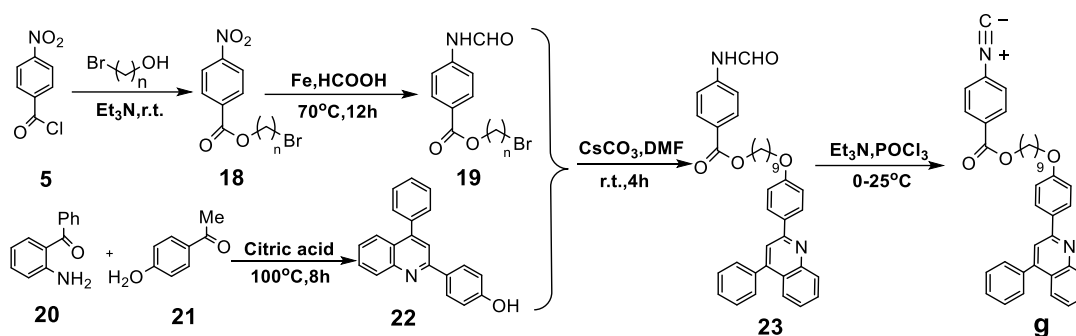

**Synthesis of 9-bromononyl 4-nitrobenzoate (18)** Under nitrogen atmosphere, 4-nitrobenzoyl chloride (0.56 g, 3.0 mmol) was dissolved in dry DCM (20ml), then Et<sub>3</sub>N(0.5ml) and D-menthol (1.5 g, 9.7 mmol) were added in one portion and the resulting mixture was stirred at room temperature for 8 h.<sup>3</sup> After removal of Et<sub>3</sub>N under reduced pressure, the residue was dissolved in DCM (30 mL) and washed with saturated NaHCO<sub>3</sub> aqueous solution and brine; the separated organic layer was dried over anhydrous Na<sub>2</sub>SO<sub>4</sub> and concentrated under reduced pressure, the residue was purified by column chromatography (silica gel, 10:1 hexane to ethyl acetate, v/v) to afford the desired compound **18** as a white solid (0.87 g, 75 % yield). <sup>1</sup>H NMR (400 MHz, CDCl<sub>3</sub>) δ 8.28 (d, *J* = 8.4 Hz, 2H), 8.20 (d, *J* = 8.5 Hz, 2H), 4.36 (t, *J* = 6.7 Hz, 2H), 3.40 (t, *J* = 6.8 Hz, 2H), 1.90 – 1.73 (m, 4H), 1.48 – 1.27 (m, 10H).

**Synthesis of 9-bromononyl 4-formamidobenzoate (19)** Under nitrogen atmosphere, compound **18** (1.0 g, 2.7 mmol) was dissolved in 12 mL of acetic acid, then iron powder (1.51 g, 27 mmol) was added in one portion, the resulting mixture was stirred at 70 °C overnight. Then the mixture was filtered and the filter cake was washed with ethyl acetate (20 ml), the filtrate was concentrated under reduced pressure, the residue was purified by column chromatography (silica gel, 1:1 hexane to ethyl acetate, v/v) to afford the desired compound **19** as a white solid (0.9 g, 91 % yield). <sup>1</sup>H NMR (400 MHz, CDCl<sub>3</sub>) δ 8.28 (d, *J* = 8.4 Hz, 2H), 8.20 (d, *J* = 8.5 Hz, 2H), 4.36 (t, *J* = 6.7 Hz, 2H), 3.40 (t, *J* = 6.8 Hz, 2H), 1.90 – 1.73 (m, 4H), 1.48 – 1.27 (m, 10H).

**Synthesis of 4-(5-phenylquinolin-7-yl)phenol (22)** A mixture of (2-aminophenyl)-(phenyl)methanone (3.96 g, 2 mmol), 1-(4-hydroxyphenyl)ethan-1-one (3.0 g, 2.2 mmol) and citric acid (96 mg, 0.50 mmol) were heated for 8 h to 100°C.<sup>2</sup> The crude mixture was dissolved in DCM (30 mL) and concentrated under reduced pressure, the residue was purified by column chromatography (silica gel, 5:1 hexane to ethyl acetate, v/v) to afford the desired compound **22** as a white solid (3.3 g, 56 % yield). <sup>1</sup>H NMR (400 MHz, CDCl<sub>3</sub>) δ 8.21 (d, *J* = 7.9 Hz, 1H), 8.14 – 8.06 (m, 2H), 7.88 (dd, *J* = 8.4, 0.9 Hz, 1H), 7.76 (s, 1H), 7.72 (ddd, *J* = 8.4, 6.9, 1.4 Hz, 1H), 7.59 – 7.48 (m, 5H), 7.48 – 7.41 (m, 1H), 7.01 – 6.92 (m, 2H), 5.29 (s, 1H).

**Synthesis of 9-(4-(5-phenylquinolin-7-yl)phenoxy)nonyl 4-formamidobenzoate (23)** To a solution of Compound **22** (1.0 g, 3.4 mmol) in dry DMF(20 mL), cesium carbonate and compound **19** were added under nitrogen atmosphere and the mixture was stirred at room temperature for 4 h.<sup>4</sup> The reaction mixture was quenched with 1N HCl aqueous

solution, extracted with DCM (3 × 30 mL), the combined organic layers washed with saturated Na<sub>2</sub>CO<sub>3</sub> aqueous solution and brine, the separated organic layer was dried over anhydrous Na<sub>2</sub>SO<sub>4</sub> and concentrated under reduced pressure, the residue was purified by column chromatography (silica gel, 1:1 hexane to ethyl acetate, v/v) to afford the desired compound **23** as a white solid (2.0 g, 80 % yield). <sup>1</sup>H NMR (400 MHz, CDCl<sub>3</sub>) δ 8.82 (d, *J* = 11.2 Hz, 1H), 8.39 (s, 1H), 8.24 – 8.10 (m, 3H), 8.02 (t, *J* = 9.1 Hz, 2H), 7.88 (d, *J* = 8.4 Hz, 1H), 7.77 (s, 1H), 7.74 – 7.68 (m, 1H), 7.62 – 7.41 (m, 7H), 7.09 (d, *J* = 8.5 Hz, 1H), 7.02 (d, *J* = 8.7 Hz, 2H), 4.31 (t, *J* = 6.4 Hz, 2H), 4.03 (t, *J* = 6.4 Hz, 2H), 1.79 (qd, *J* = 13.6, 6.5 Hz, 4H), 1.53 – 1.32 (m, 10H).

**Synthesis of 9-(4-(5-phenylquinolin-7-yl)phenoxy)nonyl 4-isocyanobenzoate (g)** The synthetic procedure was the same with that of compound **a**. (a white solid, 58 % yield). <sup>1</sup>H NMR (400 MHz, CDCl<sub>3</sub>) δ 8.18 (dd, *J* = 15.9, 8.6 Hz, 3H), 8.10 – 8.06 (m, 2H), 7.92 (d, *J* = 8.8 Hz, 1H), 7.88 (d, *J* = 7.8 Hz, 1H), 7.78 (s, 1H), 7.71 (t, *J* = 7.5 Hz, 1H), 7.57 – 7.54 (m, 3H), 7.53 – 7.49 (m, 1H), 7.45 (t, *J* = 7.4 Hz, 3H), 7.03 (d, *J* = 8.8 Hz, 2H), 7.00 (s, 1H), 6.91 (d, *J* = 8.9 Hz, 1H), 4.33 (t, *J* = 6.7 Hz, 2H), 4.04 (t, *J* = 6.5 Hz, 2H), 1.86 – 1.73 (m, 4H), 1.52 – 1.30 (m, 10H).

**Scheme S8. Synthesis of 4-(4-phenylquinolin-2-yl)phenyl 4-isocyanobenzoate (PQPI)**

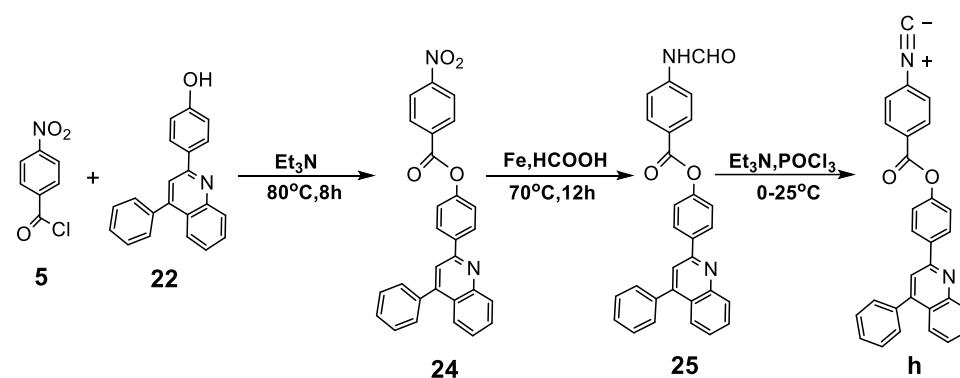

**Synthesis of 4-(4-phenylquinolin-2-yl)phenyl 4-nitrobenzoate (24)** Under nitrogen atmosphere, 4-nitrobenzoyl chloride (0.78 g, 4.2 mmol) was dissolved in dry DMF (15 mL), then Et<sub>3</sub>N (3 mL) and compound **22** (0.60 g, 2 mmol) were added in one portion and the resulting mixture was stirred at 80 °C for 8 h, cooled and then poured into ice-cold water. The precipitate was collected by filtration, washed thoroughly with water and methanol and dried. The crude product was then recrystallized in ethanol, finally dried in vacuum to afford the desired compound **24** as a yellow solid (0.5 g, 56 % yield). <sup>1</sup>H NMR (400 MHz, CDCl<sub>3</sub>) δ 8.40 (q, *J* = 9.0 Hz, 4H), 8.34 (d, *J* = 1.4 Hz, 1H), 8.31 (d, *J* = 8.7 Hz, 2H), 7.93 (d, *J* = 8.3 Hz, 1H), 7.83 (s, 1H), 7.76 (t, *J* = 7.5 Hz, 1H), 7.61 – 7.47 (m, 6H), 7.42 (d, *J* = 8.7 Hz, 2H).

**Synthesis of 4-(4-phenylquinolin-2-yl)phenyl 4-formamidobenzoate (25)** The synthetic procedure was the same with that of compound **24**. (a white solid, 63 % yield). <sup>1</sup>H NMR (400 MHz, CDCl<sub>3</sub>) δ 8.91 (d, *J* = 11.2 Hz, 1H), 8.46 (s, 1H), 8.24 (dt, *J* = 24.6, 11.6 Hz, 5H), 8.05 (d, *J* = 8.4 Hz, 1H), 7.92 (d, *J* = 8.4 Hz, 1H), 7.83 (s, 1H), 7.74 (dd, *J* = 17.5, 8.2 Hz, 3H), 7.61 – 7.44 (m, 7H), 7.39 (d, *J* = 8.4 Hz, 2H), 7.32 (d, *J* = 8.5 Hz, 1H), 7.20 (d, *J* = 8.4 Hz, 1H).

**Synthesis of 4-(4-phenylquinolin-2-yl)phenyl 4-isocyanobenzoate (h)** The synthetic procedure was the same with that of compound **a**. (a white solid, 64 % yield). <sup>1</sup>H NMR (400 MHz, CDCl<sub>3</sub>) δ 8.34 – 8.21 (m, 5H), 7.96 – 7.89 (m, 1H), 7.85 – 7.81 (m, 1H), 7.79 – 7.72 (m, 1H), 7.61 – 7.46 (m, 8H), 7.42 – 7.36 (m, 2H).

**Scheme S9. Synthesis of 2-(4-isocyanophenyl)-4-phenylquinoline (IPQ)**

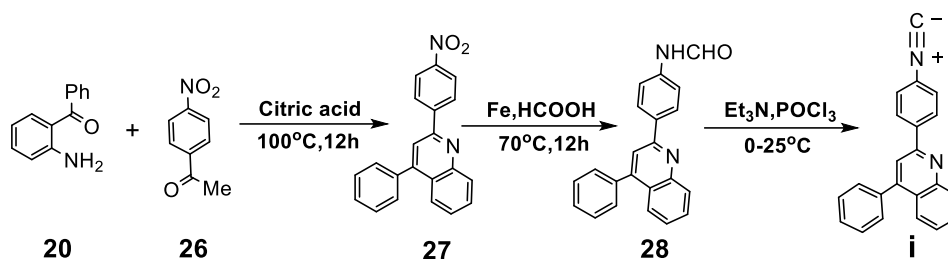

**Synthesis of 2-(4-nitrophenyl)-4-phenylquinoline (27)** The synthetic procedure was the same with that of compound 22. (a white solid, 30 % yield). <sup>1</sup>H NMR (400 MHz, CDCl<sub>3</sub>) δ 8.43 – 8.35 (m, 4H), 8.26 (d, *J* = 8.4 Hz, 1H), 7.95 (d, *J* = 8.4 Hz, 1H), 7.87 (s, 1H), 7.79 (t, *J* = 7.5 Hz, 1H), 7.62 – 7.51 (m, 6H).

**Synthesis of N-(4-(4-phenylquinolin-2-yl)phenyl)formamide (28)** The synthetic procedure was the same with that of compound 7. (a white solid, 56 % yield). <sup>1</sup>H NMR (400 MHz, CDCl<sub>3</sub>) δ 8.81 (d, *J* = 11.4 Hz, 1H), 8.54 (s, 1H), 8.45 (d, *J* = 1.1 Hz, 1H), 8.22 (dd, *J* = 11.8, 5.4 Hz, 3H), 8.02 (s, 1H), 7.90 (dd, *J* = 8.2, 2.9 Hz, 1H), 7.79 (d, *J* = 4.4 Hz, 1H), 7.77 – 7.70 (m, 2H), 7.58 – 7.45 (m, 6H), 7.36 (s, 1H).

**Synthesis of 2-(4-isocyanophenyl)-4-phenylquinoline (i)** The synthetic procedure was the same with that of compound a. (a white solid, 67 % yield). <sup>1</sup>H NMR (400 MHz, CDCl<sub>3</sub>) δ 8.28 – 8.21 (m, 3H), 7.92 (d, *J* = 7.8 Hz, 1H), 7.80 – 7.74 (m, 2H), 7.61 – 7.47 (m, 8H).

**Scheme S10. Synthesis of 9-(4-(2,2-bis(4-(diethylamino)phenyl)-1-phenylvinyl)phenoxy)nonyl 4-isocyanobenzoate (PPNI)**

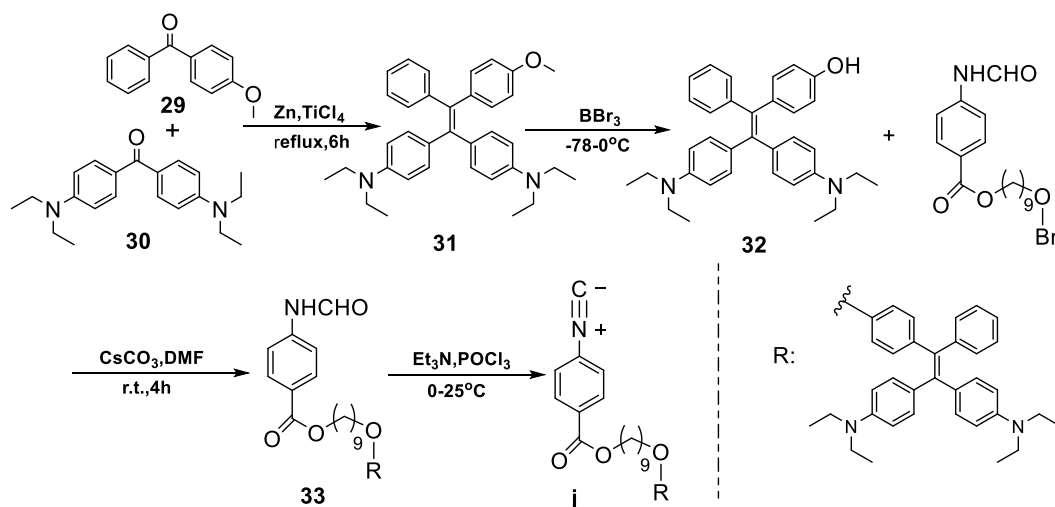

**Synthesis of 4,4'-(2-(4-methoxyphenyl)-2-phenylethene-1,1-diyl)bis(N,N-diethylaniline) (31)** Under nitrogen atmosphere, compound 29 (1.75 g, 8.26 mmol) and compound 30 (3.08 g, 9.50 mmol) was dissolved in 30 mL of dry tetrahydrofuran, then zinc powder (2.15 g, 33.04 mmol) was added in one portion, the resulting mixture was stirred, then TiCl<sub>4</sub> (3.63 mL, 33.04 mmol) was added dropwise and the mixture was allowed to refluxed for 6 h.<sup>4</sup> Then the reaction mixture was quenched with an aqueous solution of sodium carbonate, extracted with DCM (3×30 mL), the combined organic layers were dried over anhydrous Na<sub>2</sub>SO<sub>4</sub> and evaporated to remove the solvent. The residue was purified by column chromatography (silica gel, 1:2 hexane to DCM, v/v) to afford the desired compound 31 as a yellow solid, 60 % yield. <sup>1</sup>H NMR (400 MHz, CDCl<sub>3</sub>) δ 7.12–7.00 (m, 8H), 6.98 – 6.92 (m, 3H), 6.91 – 6.83 (m, 4H), 6.64 (dt, *J* = 8.6, 6.5 Hz, 3H), 6.40 (dd, *J* = 11.2, 8.9 Hz, 3H), 3.74 (d, *J* = 3.3 Hz, 3H), 3.28 (p, *J* = 7.0 Hz, 8H), 1.11 (q, *J* = 6.9 Hz, 12H).

**Synthesis of 4-(2,2-bis(4-(diethylamino)phenyl)-1-phenylvinyl)phenol (32)** Under nitrogen atmosphere, compound 31 (4.3 g, 8.6 mmol) was dissolved in 30 mL of dry DCM, after the solution was cooled to -78°C, BBr<sub>3</sub> (10

mL, 8.6 mmol) was added dropwise and the resulting mixture was stirred at 0°C for 2 h. Then the reaction solution was quenched with ice water, extracted with DCM (3×30 mL), the combined organic layers were dried over anhydrous Na<sub>2</sub>SO<sub>4</sub> and evaporated to remove the solvent. The residue was purified by column chromatography (silica gel, 1:20 MeOH to DCM, v/v) to afford the desired compound **32** as a green solid (0.9 g, 57 % yield). <sup>1</sup>H NMR (400 MHz, CDCl<sub>3</sub>) δ 7.06 (s, 6H), 6.88 (s, 6H), 6.56 (s, 2H), 6.40 (s, 3H), 3.91 (s, 1H), 3.28 (s, 8H), 1.11 (d, J = 5.1 Hz, 12H).

**Synthesis of 9-(4-(2,2-bis(4-(diethylamino)phenyl)-1-phenylvinyl)phenoxy)nonyl 4-formamidobenzoate (**33**)** The synthetic procedure was the same with that of compound **23**. (a yellow solid, 57 % yield). <sup>1</sup>H NMR (400 MHz, CDCl<sub>3</sub>) δ 8.83 (dd, J = 11.2, 3.7 Hz, 1H), 8.41 (d, J = 19.9 Hz, 1H), 8.03 (dd, J = 11.9, 5.6 Hz, 3H), 7.61 (dd, J = 12.0, 8.8 Hz, 2H), 7.14 – 6.98 (m, 9H), 6.95 – 6.82 (m, 6H), 6.62 (d, J = 8.5 Hz, 2H), 6.39 (dd, J = 11.5, 8.9 Hz, 4H), 4.30 (t, J = 6.5 Hz, 3H), 3.85 (dd, J = 14.9, 6.8 Hz, 2H), 3.33 – 3.18 (m, 8H), 1.80 – 1.69 (m, 5H), 1.47 – 1.29 (m, 16H), 1.10 (dt, J = 10.8, 5.4 Hz, 12H).

**Synthesis of 9-(4-(2,2-bis(4-(diethylamino)phenyl)-1-phenylvinyl)phenoxy)nonyl 4-isocyanobenzoate (**j**)** The synthetic procedure was the same with that of compound **a**. (a yellow oil, 72 % yield). <sup>1</sup>H NMR (400 MHz, CDCl<sub>3</sub>) δ 8.10 – 8.05 (m, 2H), 7.48 – 7.40 (m, 2H), 7.13 – 6.98 (m, 5H), 6.97 – 6.81 (m, 6H), 6.67 – 6.58 (m, 2H), 6.47 – 6.31 (m, 4H), 4.36 – 4.29 (m, 2H), 3.93 – 3.81 (m, 2H), 3.42 – 3.14 (m, 8H), 1.81 – 1.69 (m, 4H), 1.47 – 1.30 (m, 13H), 1.16 – 1.04 (m, 12H).

**Scheme S11. Synthesis of (E)-1-(4-isocyanophenyl)-2-phenyldiazene (IPD)**

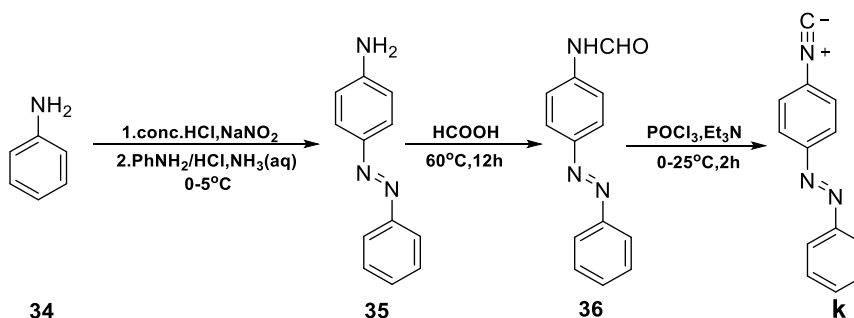

**Synthesis of (E)-4-(phenyldiazenyl)aniline (**35**)** To a solution of 37 % conc. HCl (13.0 mL), aniline (4 g, 43.4 mmol), an aqueous solution of sodium nitrite (3.02 g, 43.4 mmol) was added dropwise in 0 °C, then the mixture was stirred for 1h to an yellow transparent diazonium salt solution. The coupling solution was prepared by using aniline (4 g, 43.4 mmol) and hydrochloric acid (1 N, 44 mL) under vigorous stirring at 0-5 °C. The diazonium salt solution was added dropwise to the coupling solution at 0-5 °C and the solution was stirred for 3h. The final solution was added slowly to ammonia solution (1N, 60 mL) and an yellow-orange crude product was obtained.<sup>5</sup> The crude product was then recrystallized in ethanol, finally dried in vacuum to afford the desired compound **35** as a yellow solid (5.9 g, 69 % yield). <sup>1</sup>H NMR (400 MHz, CDCl<sub>3</sub>) δ 7.88 – 7.79 (m, 4H), 7.53 – 7.45 (m, 2H), 7.43 – 7.38 (m, 1H), 6.78 – 6.71 (m, 2H), 4.04 (s, 2H).

**Synthesis of (E)-N-(4-(phenyldiazenyl)phenyl)formamide (**36**)** The synthetic procedure was the same with that of compound **2**. (a red solid, 81 % yield). <sup>1</sup>H NMR (400 MHz, CDCl<sub>3</sub>) δ 8.84 (d, J = 11.3 Hz, 1H), 8.45 (d, J = 1.4 Hz, 1H), 7.99 – 7.84 (m, 4H), 7.72 (d, J = 8.8 Hz, 1H), 7.56 – 7.44 (m, 3H), 7.35 (s, 1H), 7.21 (d, J = 8.7 Hz, 1H).

**Synthesis of (E)-1-(4-isocyanophenyl)-2-phenyldiazene (**k**)** The synthetic procedure was the same with that of compound **a**. (a white solid, 65 % yield). <sup>1</sup>H NMR (400 MHz, CDCl<sub>3</sub>) δ 8.84 (d, J = 11.3 Hz, 1H), 8.45 (d, J = 1.4 Hz, 1H), 7.99 – 7.84 (m, 4H), 7.72 (d, J = 8.8 Hz, 1H), 7.56 – 7.44 (m, 3H), 7.35 (s, 1H), 7.21 (d, J = 8.7 Hz, 1H).

**A typical procedure for the polymerization of 4-ethoxycarbonyl phenyl isocyanide (EPI) (Table 1, entry 3)**

In the glove box, after [(Et<sub>3</sub>Si)<sub>2</sub>H][B(C<sub>6</sub>F<sub>5</sub>)<sub>4</sub>] (9.1 mg, 10 μmol) was dissolved in chlorobenzene (1 mL), the resulting mixture was stirred at 25 °C for 5 min. Then a solution of 4-ethoxycarbonyl phenyl isocyanide (87.5 mg, 0.5 mmol)

in chlorobenzene (2 mL) was added in one portion and the resulting mixture was stirred at 25 °C for 1min. The reaction mixture was taken out of the glove box and poured into methanol (100 mL) to precipitate the polymer product. The yellow polymer solid was collected by filtration and dried in vacuum at 40 °C to a constant weight. The product obtained is soluble thoroughly in CHCl<sub>3</sub> at 25 °C.

**A typical procedure for the copolymerization of (1*S*,2*R*,5*S*)-2-isopropyl-5-methylcyclohexyl 4-isocyanobenzoate (D-IMCI) with 4-isocyano-4'-(1,2,2-triphenylvinyl)-1,1'-biphenyl (ITPB) (Table 2, entry 3)**

In the glove box, after [(Et<sub>3</sub>Si)<sub>2</sub>H][B(C<sub>6</sub>F<sub>5</sub>)<sub>4</sub>] (9.1 mg, 10 μmol) was dissolved in chlorobenzene (1 mL), the resulting mixture was stirred at 25 °C for 5 min. Then a solution of (1*S*,2*R*,5*S*)-2-isopropyl-5-methylcyclohexyl 4-isocyanobenzoate (142.6 mg, 0.5 mmol) and 4-isocyano-4'-(1,2,2-triphenylvinyl)-1,1'-biphenyl (216.6 mg, 0.5 mmol) in chlorobenzene (2 mL) was added in one portion and the resulting mixture was stirred at 25 °C for 3min. The reaction mixture was taken out of the glove box and poured into methanol (100 mL) to precipitate the copolymer product. The orange copolymer solid was collected by filtration and dried in vacuum at 40 °C to a constant weight. The product obtained is soluble thoroughly in CHCl<sub>3</sub> and THF at 25 °C.

**Calculation the activity of catalyst**

$$A = m_{\text{polymer}} / (n_{\text{cat}} \cdot t)$$

A: the activity of (co)polymerization (g of polymer/(mol<sub>cat</sub>·h)), m<sub>polymer</sub>: the mass of (co)polymer (g), t: the reaction time of (co)polymerization (h), n<sub>cat</sub>: molar amount of catalyst (mol).

$$n_{\text{cat}} = m_{\text{catalyst}} / M_{\text{catalyst}}$$

m<sub>catalyst</sub>: the mass of catalysts (g), M<sub>catalyst</sub>: the relative molecular weight of catalyst.

**Calculation of the IMCI contents of the copolymers**

The IMCI contents of the copolymers were calculated from the <sup>1</sup>H NMR spectra according to the following formula:

$$\omega(\text{mol}\%)_{\text{IMCI}} = \{[23(I_{\text{H}3}+I_{\text{H}4})]/[19(I_{\text{H}1}+I_{\text{H}2}+I_{\text{H}3}+I_{\text{H}4})]\} \times 100$$

In which I<sub>H1</sub> is the integration of the peak at 7.08 ppm which assigned to the aryl protons of ITPB units and the β-H of the aryl ring of IMCI units. I<sub>H2</sub> is the integration of the peak at 5.82 ppm which assigned to the α-H of the aryl ring of IMCI units. I<sub>H3</sub> is the integration of the peak at 4.88 ppm ascribed to the proton of the cyclohexyl carbon connected with the oxygen. I<sub>H4</sub> is the integration of the peaks between 0.3 to 2.5 ppm which assigned to the rest protons of the cyclohexyl group as well as the substituted methyl and the isopropyl.

The IMCI contents of poly(D-IMCI-co-IPI)s and poly(L-IMCI-co-IPI)s were calculated from the <sup>1</sup>H NMR spectra according to the following formula:

$$\omega(\text{mol}\%)_{\text{IMCI}} = \{[5 \times I_{\text{H}4} - 6(I_{\text{H}1}+I_{\text{H}2}+I_{\text{H}3})]/[12(I_{\text{H}1}+I_{\text{H}2}+I_{\text{H}3})]\} \times 100$$

In which I<sub>H1</sub> is the integration of the peak at 7.08 ppm which assigned to the aryl protons of IPI units and the H of the aryl ring of IMCI units. I<sub>H2</sub> is the integration of the peak at 5.82 ppm which assigned to the H of the aryl ring of IMCI and IPI units. I<sub>H3</sub> is the integration of the peak at 4.88 ppm ascribed to the proton of the cyclohexyl carbon connected with the oxygen and the proton of the isopropyl carbon connected with the oxygen. I<sub>H4</sub> is the integration of the peaks between 0.3 to 2.5 ppm which assigned to the rest protons of the cyclohexyl group as well as the substituted methyl and the isopropyl and the rest protons of the isopropyl.

The IMCI contents of poly(D-IMCI-co-IPD)s and poly(L-IMCI-co-IPD)s were calculated from the <sup>1</sup>H NMR spectra according to the following formula:

$$\omega(\text{mol}\%)_{\text{IMCI}} = \{[5(I_{\text{H}3}+I_{\text{H}4})]/[23(I_{\text{H}2}-I_{\text{H}1})+5(I_{\text{H}3}+I_{\text{H}4})]\} \times 100$$

In which I<sub>H1</sub> is the integration of the peak at 7.08 ppm which assigned to the aryl protons of IPD units and the H of the aryl ring of IMCI units. I<sub>H2</sub> is the integration of the peak at 5.82 ppm which assigned to the H of the aryl ring of IMCI units. I<sub>H3</sub> is the integration of the peak at 4.88 ppm ascribed to the proton of the cyclohexyl carbon connected

with the oxygen.  $I_{H4}$  is the integration of the peaks between 0.3 to 2.5 ppm which assigned to the rest protons of the cyclohexyl group as well as the substituted methyl and the isopropyl.

The IMCI contents of poly(D-IMCI-co-EPI)s and poly(L-IMCI-co-EPI)s were calculated from the  $^1\text{H}$  NMR spectra according to the following formula:

$$\omega(\text{mol\%})\text{IMCI} = \{[4(2I_{H4}-3I_{H3})]/[41(I_{H1} + I_{H2})]\} \times 100$$

In which  $I_{H1}$  is the integration of the peak at 7.08 ppm which assigned to the aryl protons of EPI units and the H of the aryl ring of IMCI units.  $I_{H2}$  is the integration of the peak at 5.82 ppm which assigned to the H of the aryl ring of IMCI and EPI units.  $I_{H3}$  is the integration of the peak at 4.88 ppm ascribed to the proton of the cyclohexyl carbon connected with the oxygen and the proton of the ethyl carbon connected with the oxygen.  $I_{H4}$  is the integration of the peaks between 0.3 to 2.5 ppm which assigned to the rest protons of the cyclohexyl group as well as the substituted ethyl.

### Solvent separation experiments

4 mg of poly(D/L-IMCI) (Table 1, entry 18, 20) was added into 2 mL of toluene, the mixture was shaken for about 1h and most of the solid dissolved in toluene completely. 4 mg of poly(ITPB) (Table 1, entry 22) or poly(IPI) (Table 1, entry 17) or poly(IPD) (Table 1, entry 28) was added into 2 mL of toluene and exhibited poor solubility. After shaken for about 1 hour, there was still some solid precipitated in the solution. Then 4 mg of the copolymer products (Table 2, entry 8; Table 2, entry 13; Table 2, entry 28) was added into 2 mL of toluene, the mixture was shaken for 1 min and the solid dissolved in toluene completely.

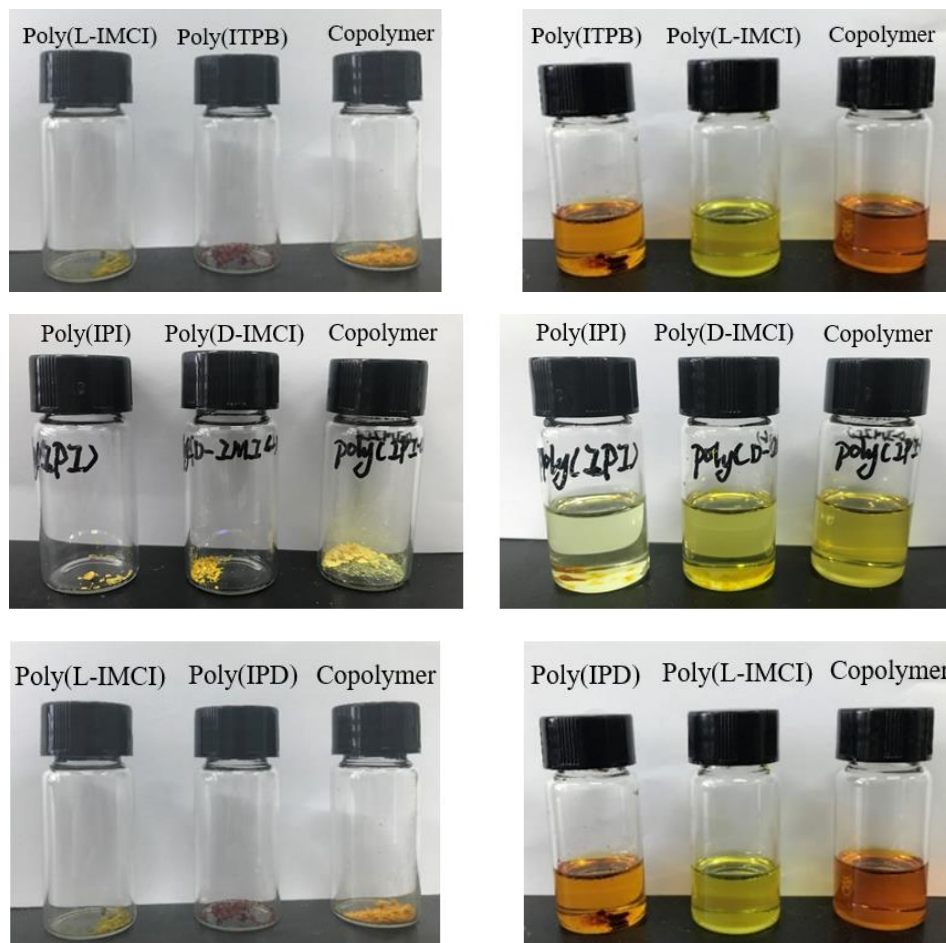

**Figure S1.** Photos of poly(D/L-IMCI), poly(ITPB), poly(IPI), poly(IPD), copolymers (left) and the solubility of poly(D/L-IMCI), poly(ITPB), poly(IPI), poly(IPD), copolymers (right) in toluene.

### Calculation of reactivity ratio of copolymerization

Formula: Fineman-Ross plot:

$$\frac{F}{f} \times (f - 1) = r_1 \times \frac{F^2}{f} - r_2$$

Copolymerization of L-IMCI with ITPB

F: L-IMCI/ITPB feed ratio in the reaction

f: L-IMCI/ITPB content in the copolymers

| L-IMCI<br>(mmol) | ITPE<br>(mmol) | L-IMCI cont.<br>(mol%) | ITPB cont.<br>(mol%) | F     | f    | X     | Y     |
|------------------|----------------|------------------------|----------------------|-------|------|-------|-------|
| 0.138            | 0.368          | 43                     | 57                   | 2.67  | 0.75 | 9.50  | -0.89 |
| 0.138            | 0.736          | 61                     | 39                   | 5.33  | 1.56 | 18.21 | 1.91  |
| 0.138            | 1.104          | 72                     | 28                   | 7.99  | 2.57 | 24.84 | 4.88  |
| 0.138            | 1.472          | 79                     | 21                   | 10.66 | 3.76 | 30.22 | 7.82  |

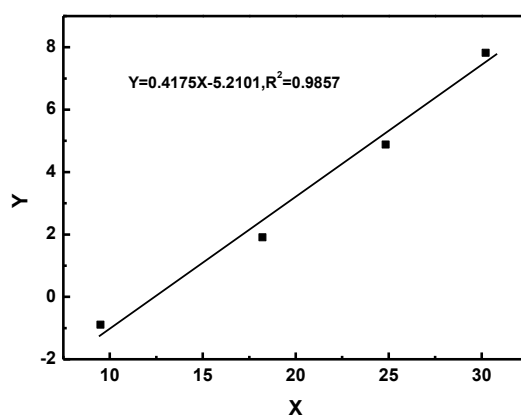

$$Y = 0.4175X - 5.2101, R^2 = 0.9857$$

$$r_{\text{L-IMCI}} = k_{\text{L-IMCID-IMCI}}/k_{\text{L-IMCIITPB}} = 0.4175, r_{\text{ITPB}} = k_{\text{ITPBITPB}}/k_{\text{ITPBL-IMCI}} = 5.2101$$

copolymerization of L-IMCI and IPI

F: L-IMIC/IPI feed ratio in the reaction

f: L-IMIC/IPI content in the copolymers

| L-IMCI<br>(mmol) | IPI<br>(mmol) | IPI cont.<br>(mol%) | L-IMCI cont.<br>(mol%) | F     | f    | X     | Y    |
|------------------|---------------|---------------------|------------------------|-------|------|-------|------|
| 0.138            | 0.368         | 54                  | 46                     | 2.67  | 1.17 | 6.09  | 0.38 |
| 0.138            | 0.736         | 65                  | 35                     | 5.33  | 1.85 | 15.36 | 2.44 |
| 0.138            | 1.104         | 73                  | 27                     | 7.99  | 2.70 | 23.64 | 5.03 |
| 0.138            | 1.472         | 77                  | 23                     | 10.66 | 3.34 | 34.02 | 7.47 |



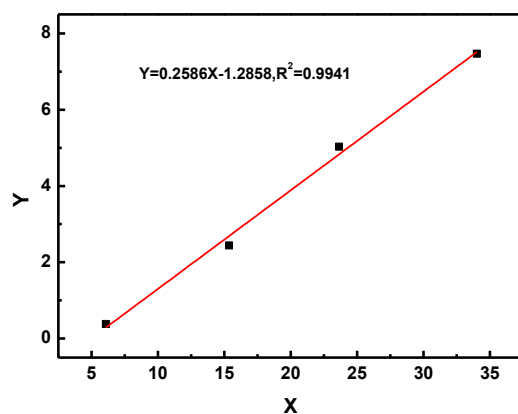

$$Y = 0.2586X - 1.2858, R^2 = 0.9941$$

$$r_{\text{IPD}} = k_{\text{IPDIPD}}/k_{\text{IPDL-IMCI}} = 0.2586, r_{\text{L-IMCI}} = k_{\text{L-IMICL-IMCI}}/k_{\text{L-IMCIPI}} = 1.2858$$

copolymerization of L-IMCI with IPD

F: IPD/L-IMCI feed ratio in the reaction

f: IPD/L-IMCI content in the copolymers

| L-IMCI<br>(mmol) | DNI<br>(mmol) | DNI cont.<br>(mol%) | L-IMCI cont.<br>(mol%) | F     | f    | X     | Y    |
|------------------|---------------|---------------------|------------------------|-------|------|-------|------|
| 0.138            | 0.368         | 49                  | 51                     | 2.67  | 1.06 | 6.73  | 0.15 |
| 0.138            | 0.736         | 40                  | 60                     | 5.33  | 1.50 | 18.94 | 1.78 |
| 0.138            | 1.104         | 36                  | 67                     | 7.99  | 2.12 | 30.11 | 4.22 |
| 0.138            | 1.472         | 27                  | 73                     | 10.66 | 2.70 | 42.09 | 6.71 |

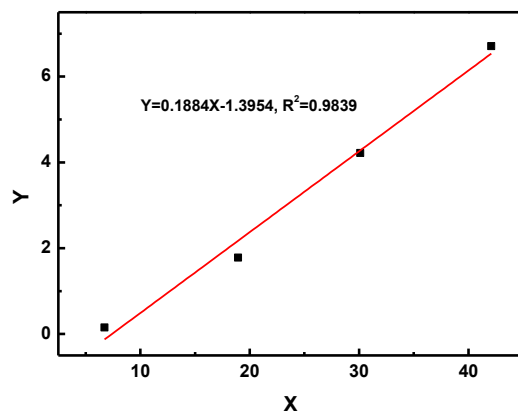

$$Y = 0.1884X - 1.3954, R^2 = 0.9839$$

$$r_{\text{DNI}} = k_{\text{IPDIPD}}/k_{\text{IPDL-IMCI}} = 0.2586, r_{\text{L-IMCI}} = k_{\text{L-IMICL-IMCI}}/k_{\text{L-IMCIIPD}} = 1.3954$$

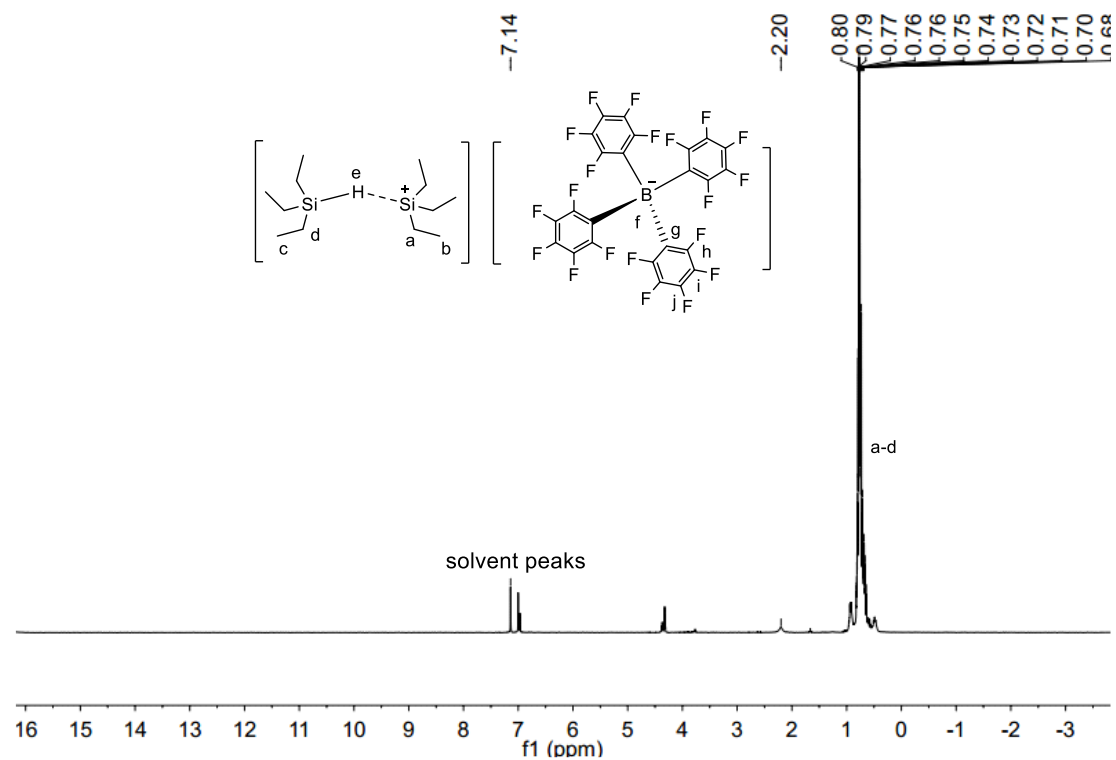

Figure S2.  $^1\text{H}$  NMR spectrum of catalyst **1** in  $\text{C}_6\text{D}_5\text{Cl}$  at 25 °C.

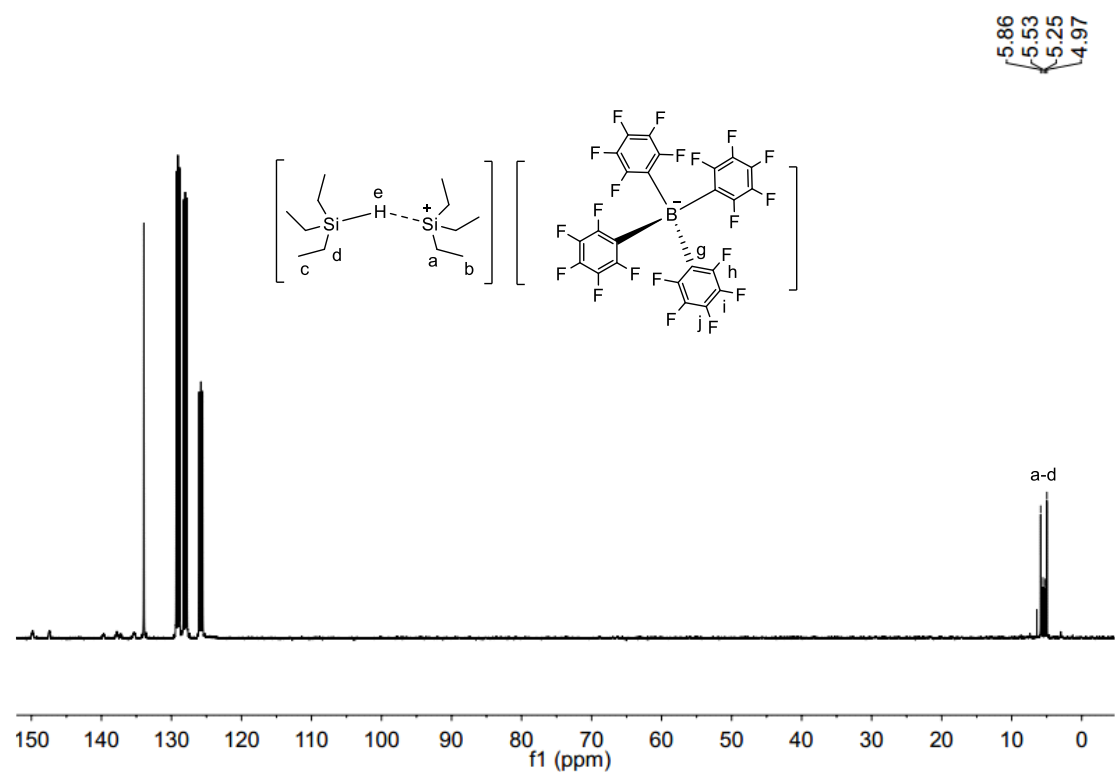

Figure S3.  $^{13}\text{C}$  NMR spectrum of catalyst **1** in  $\text{C}_6\text{D}_5\text{Cl}$  at 25 °C.

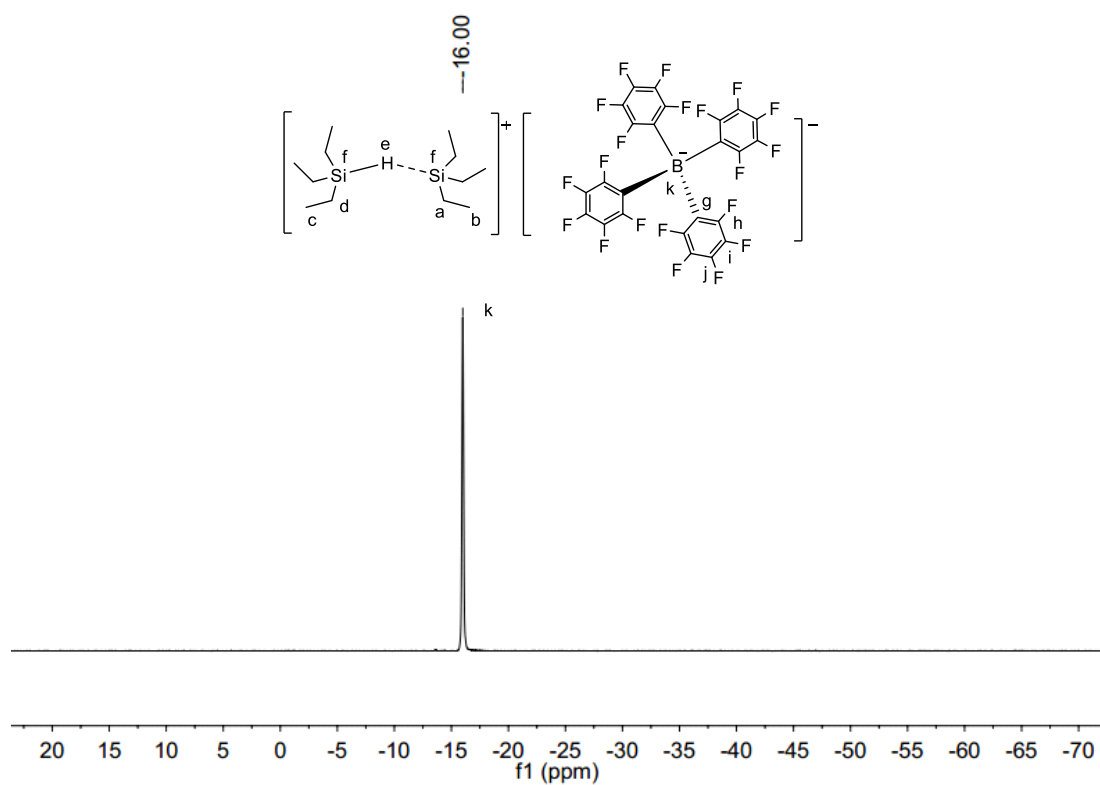

**Figure S4.**  $^{11}\text{B}$  NMR spectrum of catalyst **1** in  $\text{C}_6\text{D}_5\text{Cl}$  at 25 °C.

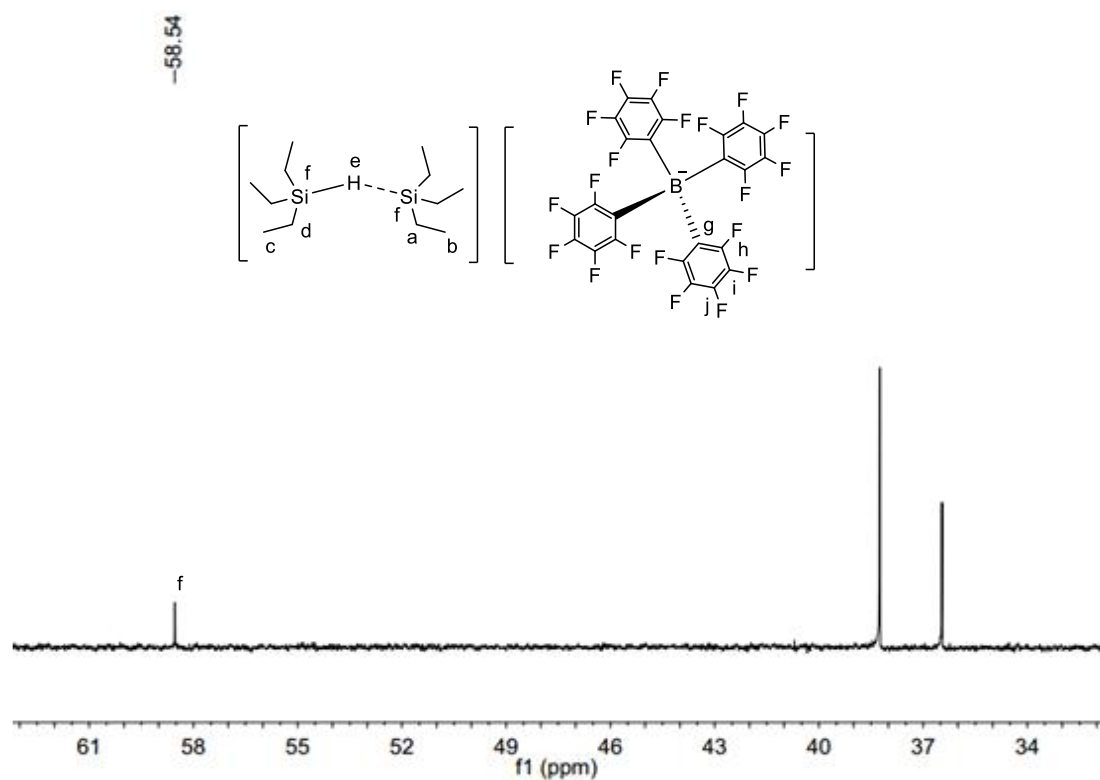

**Figure S5.**  $^{29}\text{Si}$  NMR spectrum of catalyst **1** in  $\text{C}_6\text{D}_5\text{Cl}$  at 25 °C.

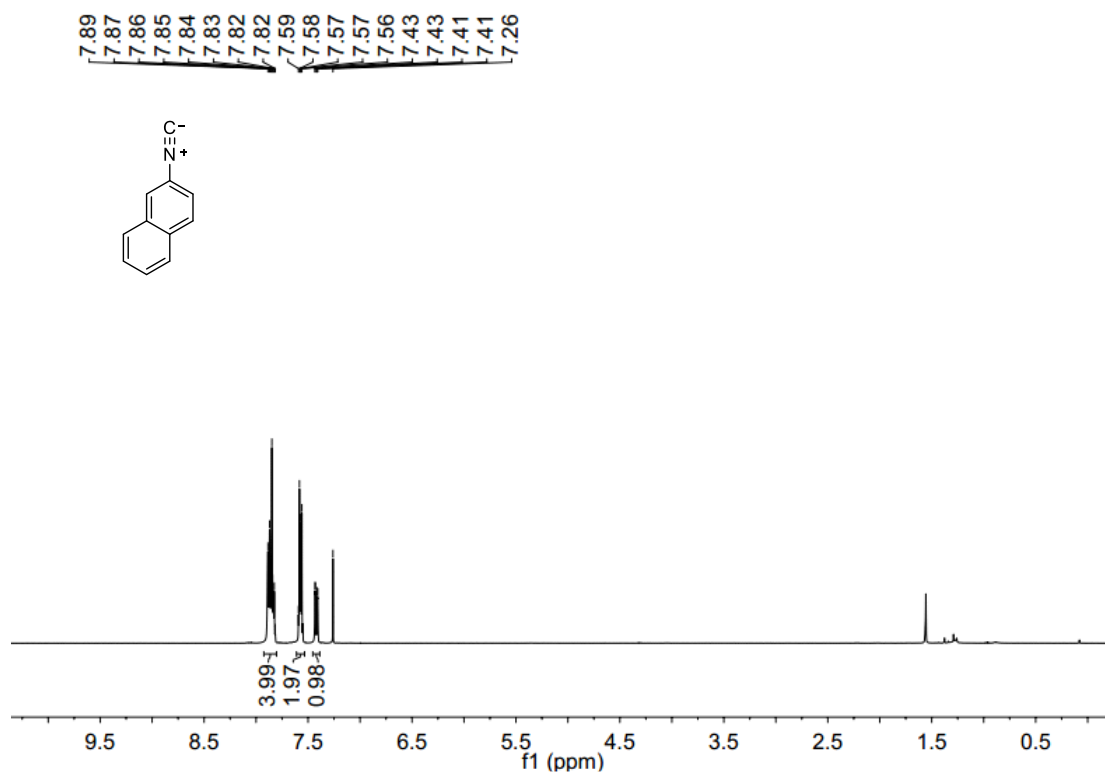

Figure S6. <sup>1</sup>H NMR spectrum of 2-naphthyl isocyanide (a) in CDCl<sub>3</sub> at 25 °C.

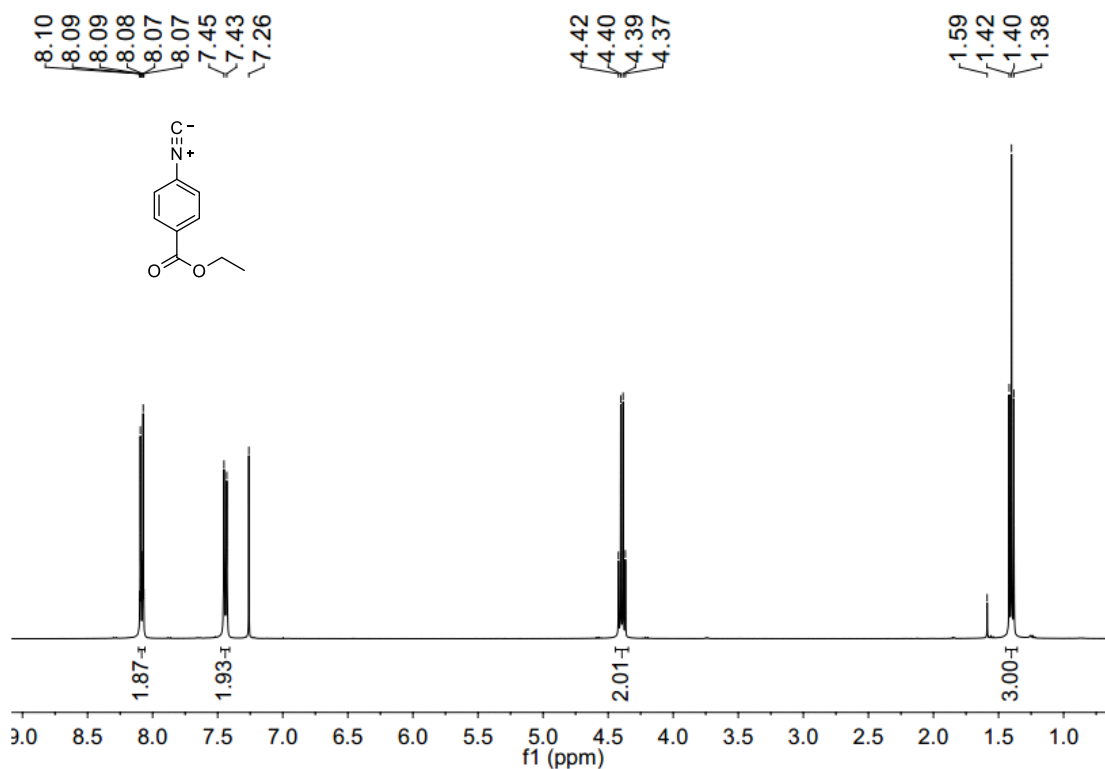

Figure S7. <sup>1</sup>H NMR spectrum of 4-ethoxycarbonyl phenyl isocyanide (b) in CDCl<sub>3</sub> at 25 °C.

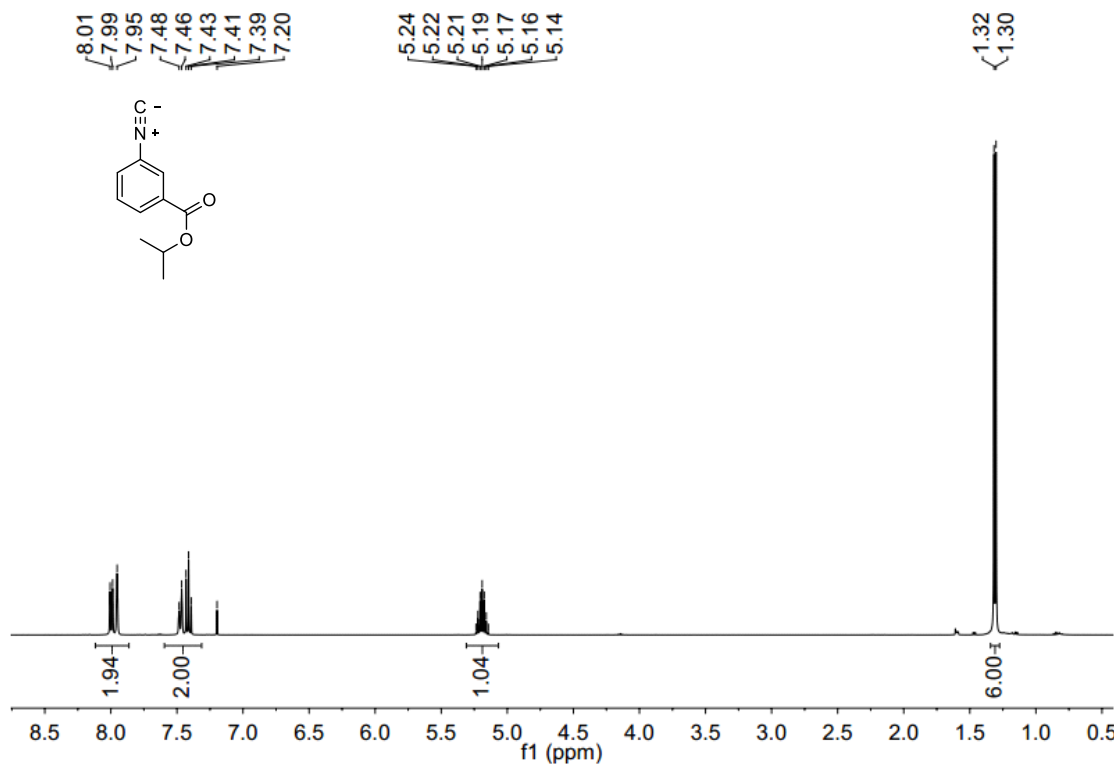

Figure S8. <sup>1</sup>H NMR spectrum of 3-isopropoxyxycarbonyl phenyl isocyanide (c) in CDCl<sub>3</sub> at 25 °C.

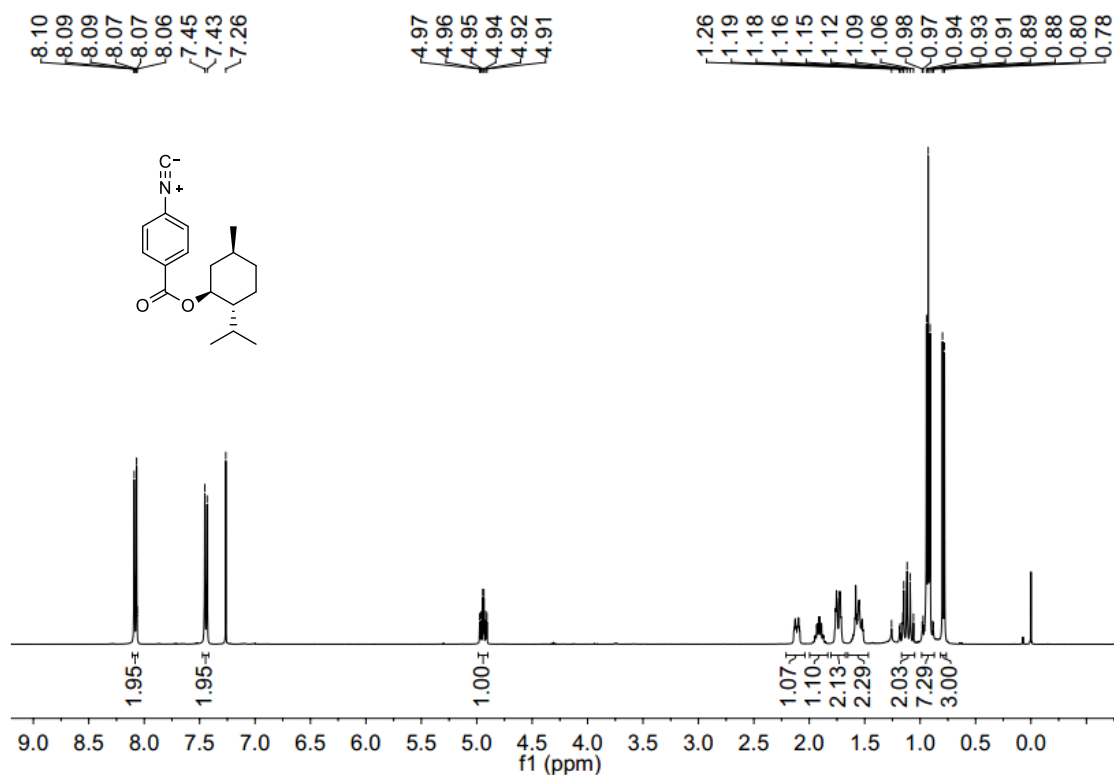

Figure S9. <sup>1</sup>H NMR spectrum of (1S,2R,5S)-2-isopropyl-5-methylcyclohexyl 4-isocyanobenzoate (d) in CDCl<sub>3</sub> at 25 °C.

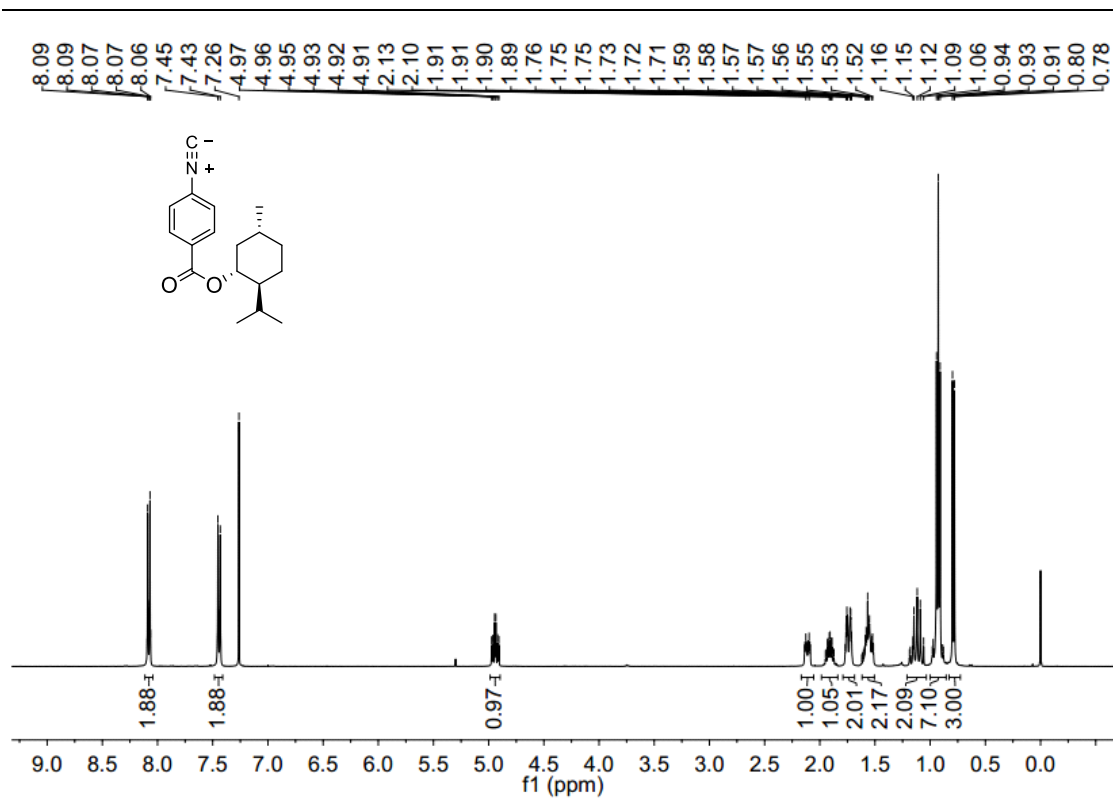

**Figure S10.** <sup>1</sup>H NMR spectrum of (1R,2S,5R)-2-isopropyl-5-methylcyclohexyl 4-isocyanobenzoate (e) in CDCl<sub>3</sub> at 25 °C.

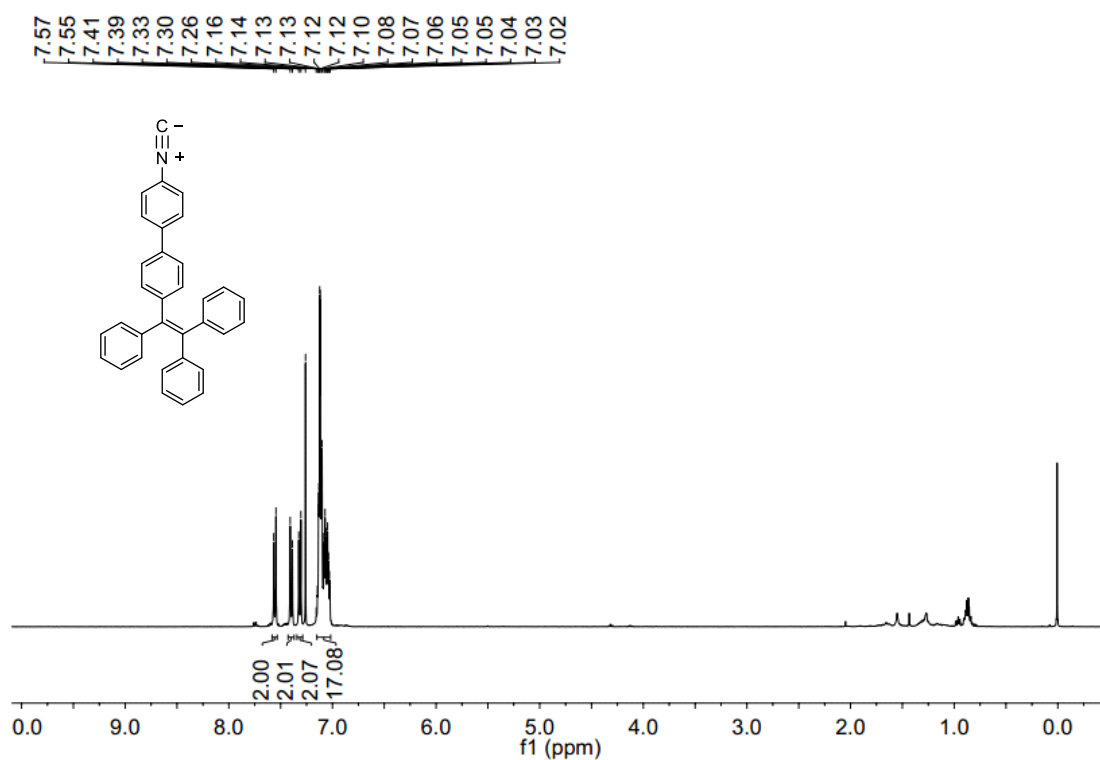

**Figure S11.** <sup>1</sup>H NMR spectrum of 4-isocyano-4'-(1,2,2-triphenylvinyl)-1,1'-biphenyl (f) in CDCl<sub>3</sub> at 25 °C.

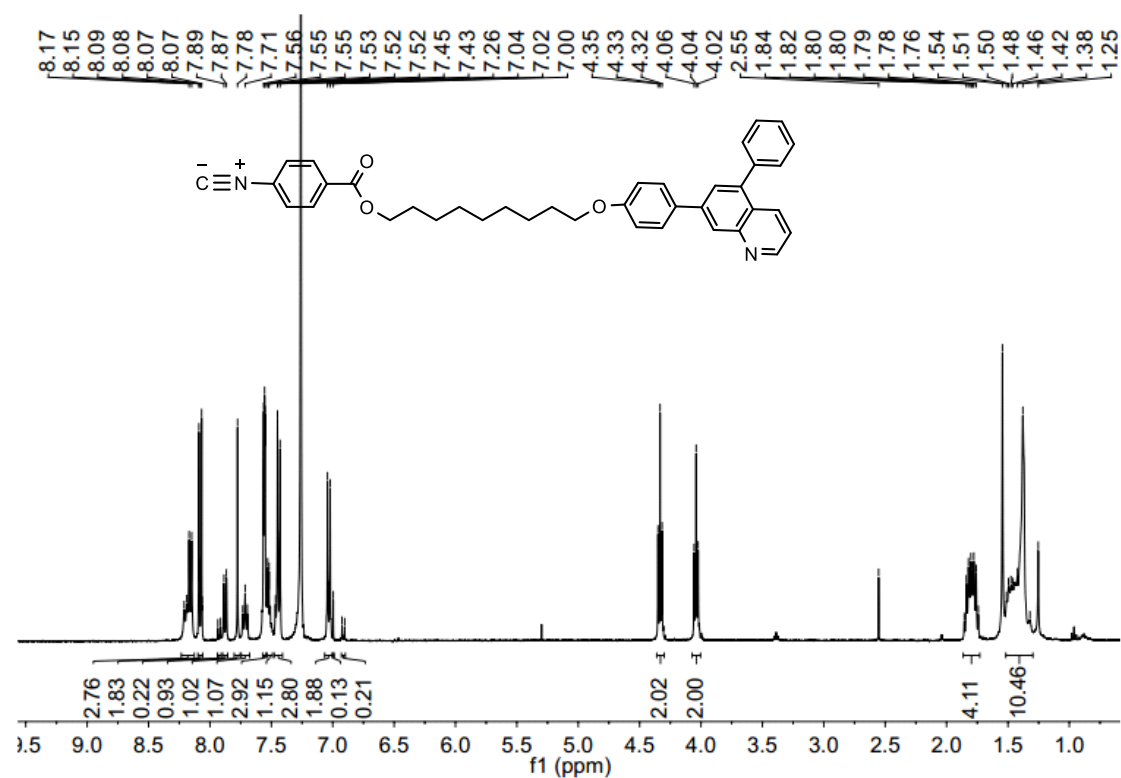

**Figure S12.** <sup>1</sup>H NMR spectrum of 9-(4-(5-phenylquinolin-7-yl)phenoxy)nonyl 4-isocyanobenzoate (g) in CDCl<sub>3</sub> at 25 °C.

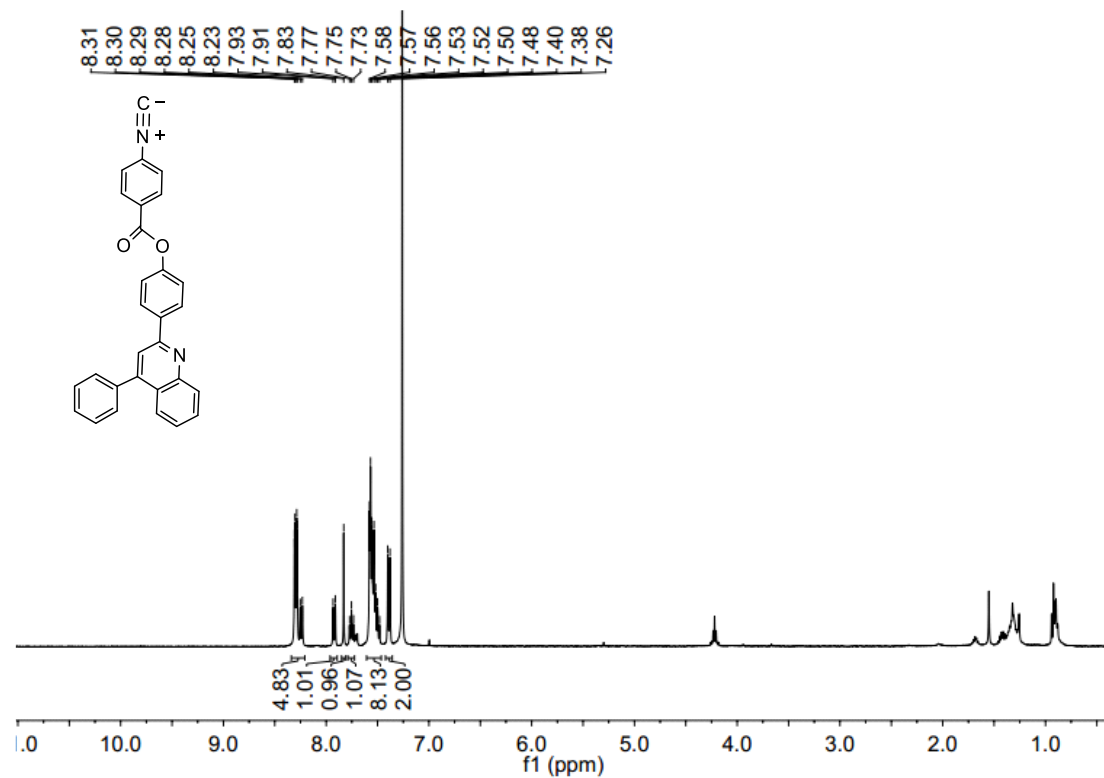

**Figure S13.** <sup>1</sup>H NMR spectrum of 4-(4-phenylquinolin-2-yl)phenyl 4-isocyanobenzoate (h) in CDCl<sub>3</sub> at 25 °C.

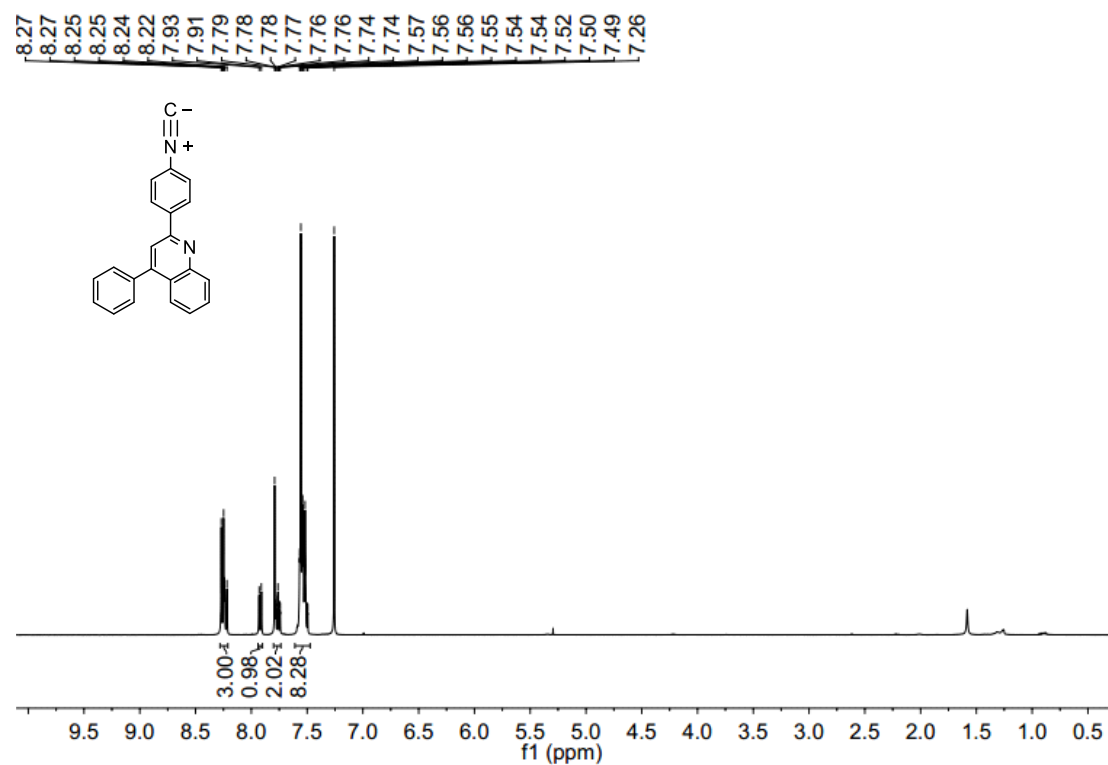

**Figure S14.** <sup>1</sup>H NMR spectrum of 2-(4-isocyanophenyl)-4-phenylquinoline (i) in CDCl<sub>3</sub> at 25 °C.

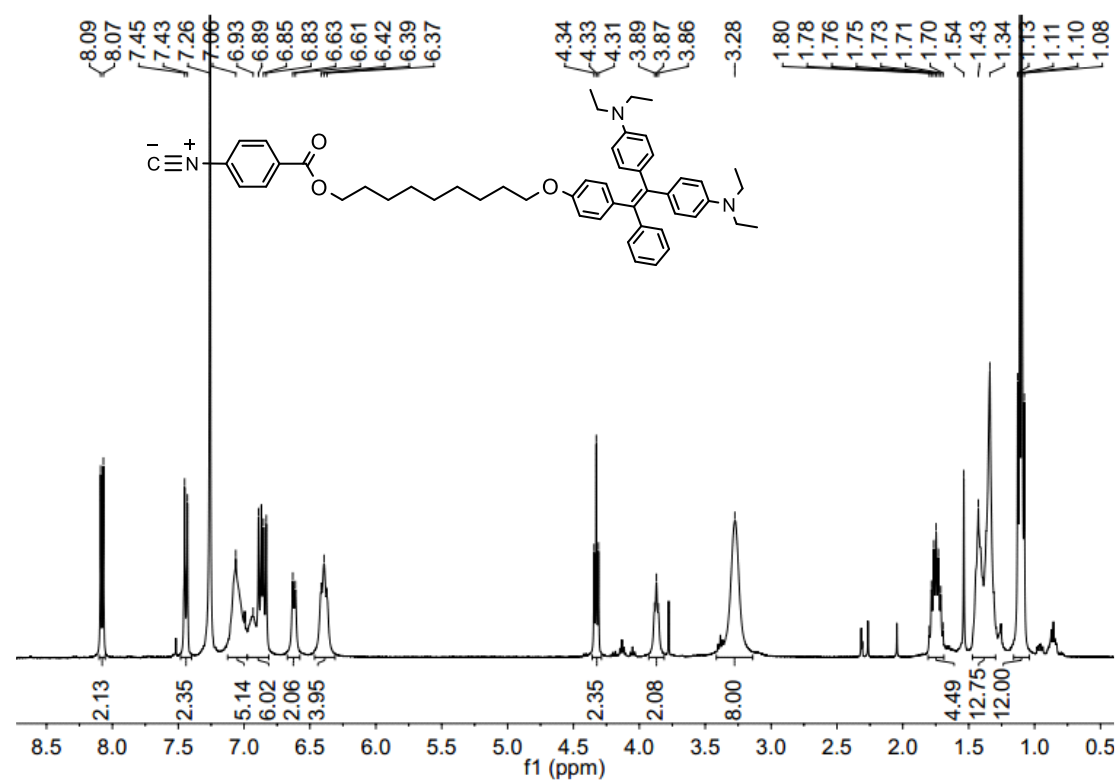

**Figure S15.** <sup>1</sup>H NMR spectrum of 9-(4-(2,2-bis(4-(diethylamino)phenyl)-1-phenylvinyl)phenoxy)nonyl 4-formamidobenzoate (j) in CDCl<sub>3</sub> at 25 °C.



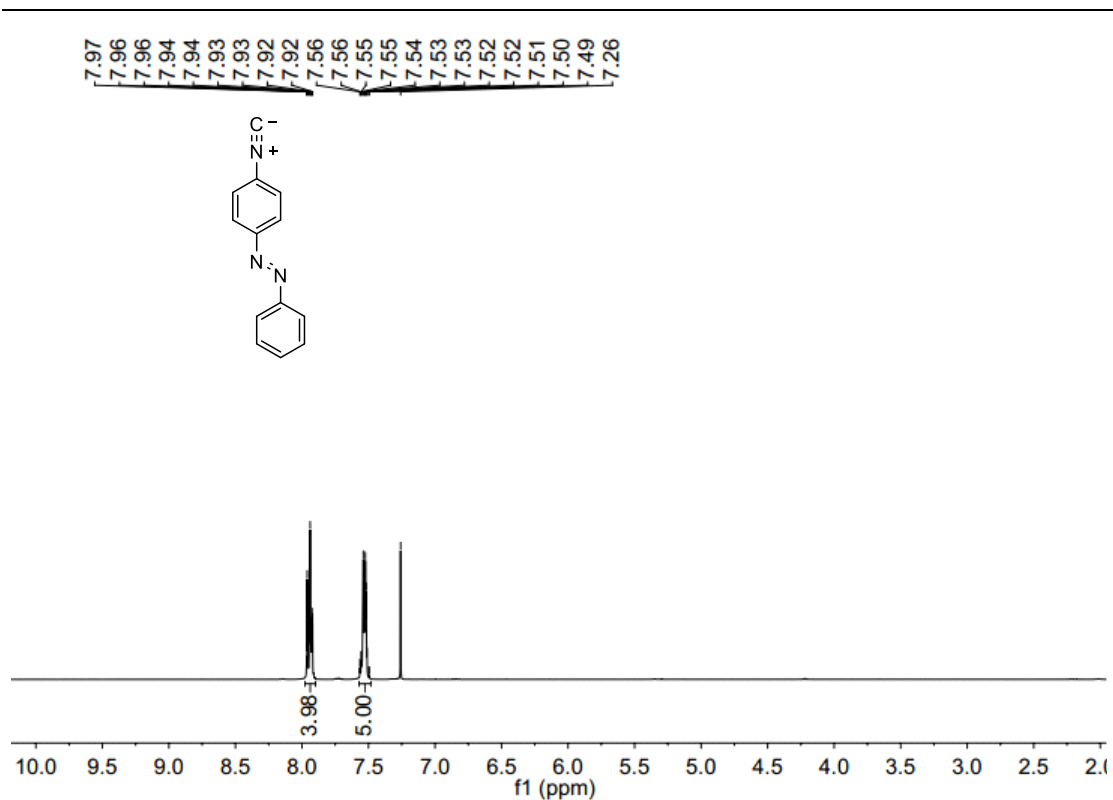

**Figure S16.** <sup>1</sup>H NMR spectrum of (*E*)-1-(4-isocyanophenyl)-2-phenyldiazene(k) in CDCl<sub>3</sub> at 25 °C.

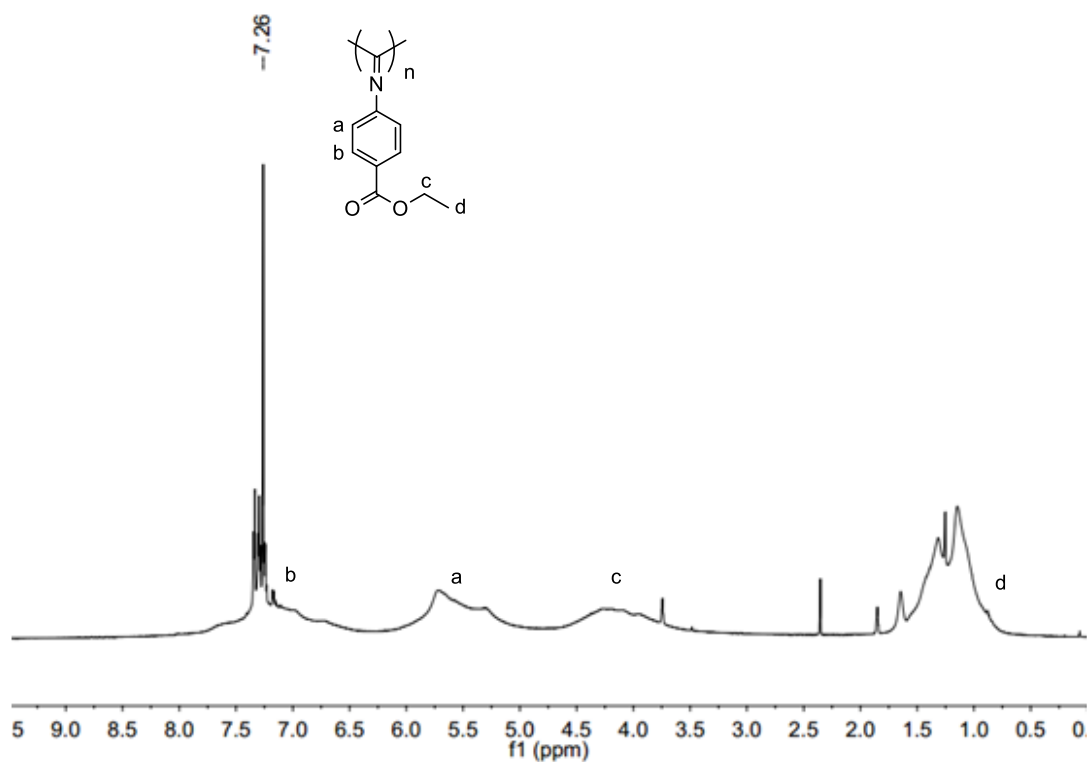

**Figure S17.** <sup>1</sup>H NMR spectrum of poly(EPI) in entry 1, Table 1.

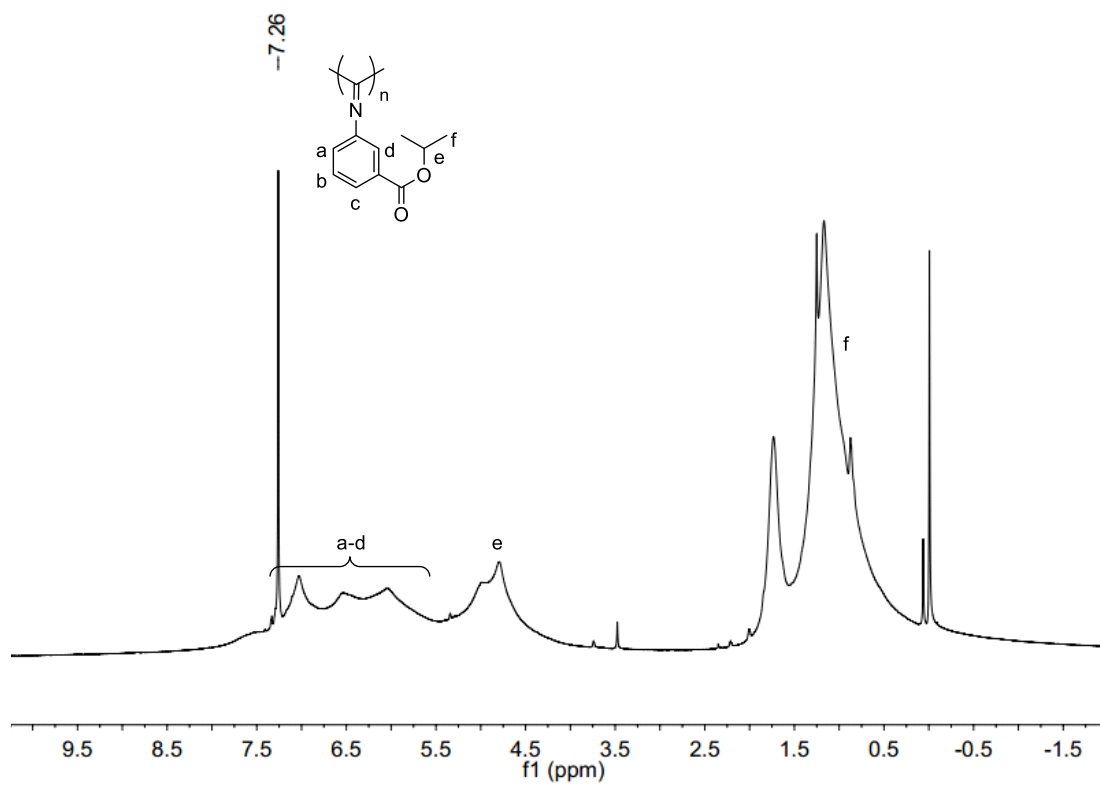

**Figure S18.**  $^1\text{H}$  NMR spectrum of poly(IPI) in entry 17, Table 1.

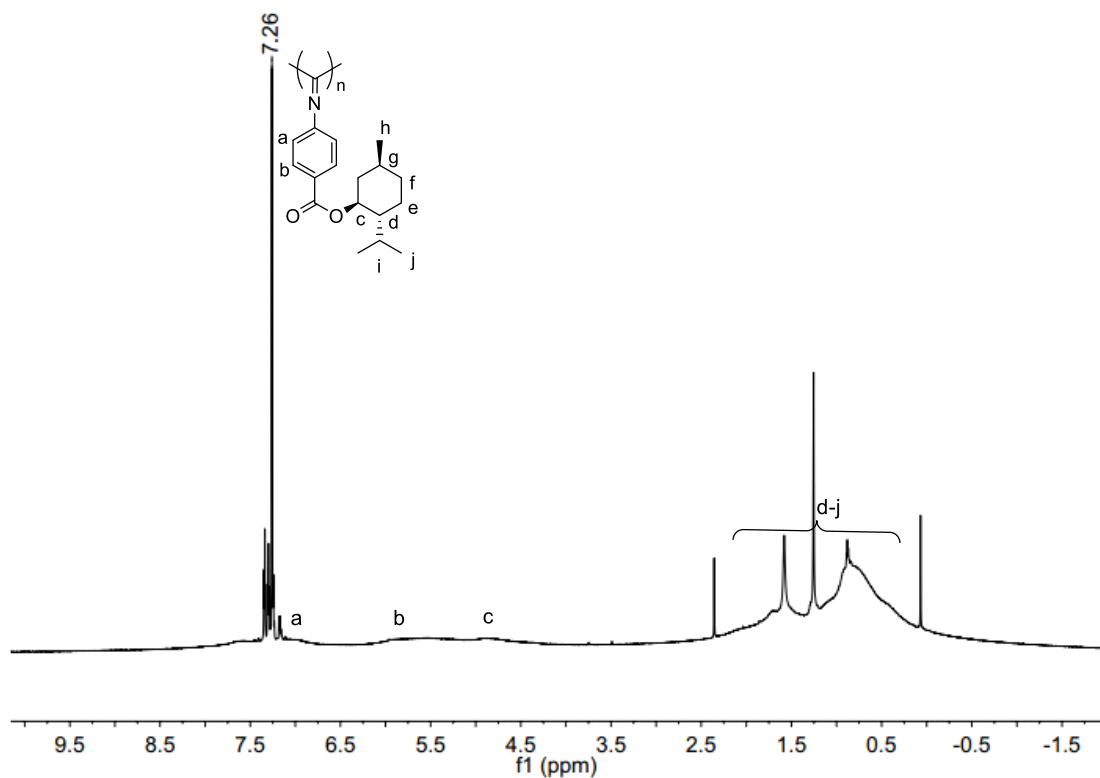

**Figure S19.**  $^1\text{H}$  NMR spectrum of poly(D-IMCI) in entry 18, Table 1.

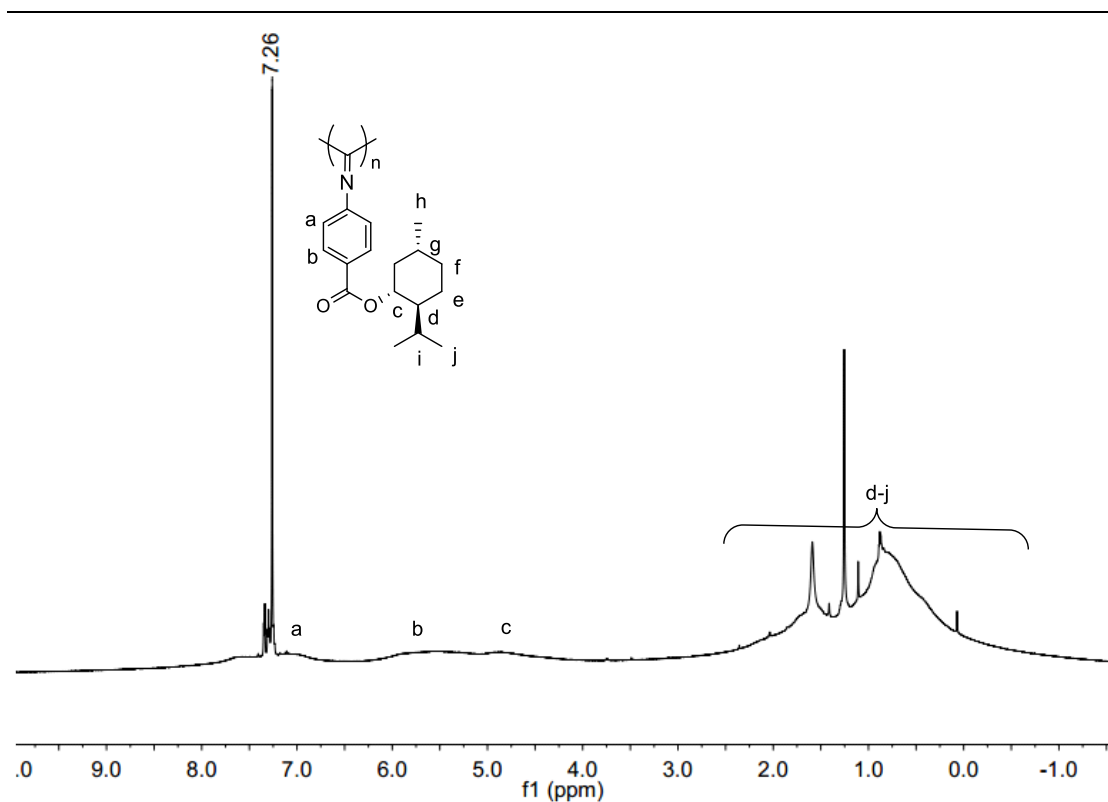

**Figure S20.**  $^1\text{H}$  NMR spectrum of poly(L-IMCl) in entry 20, Table 1.

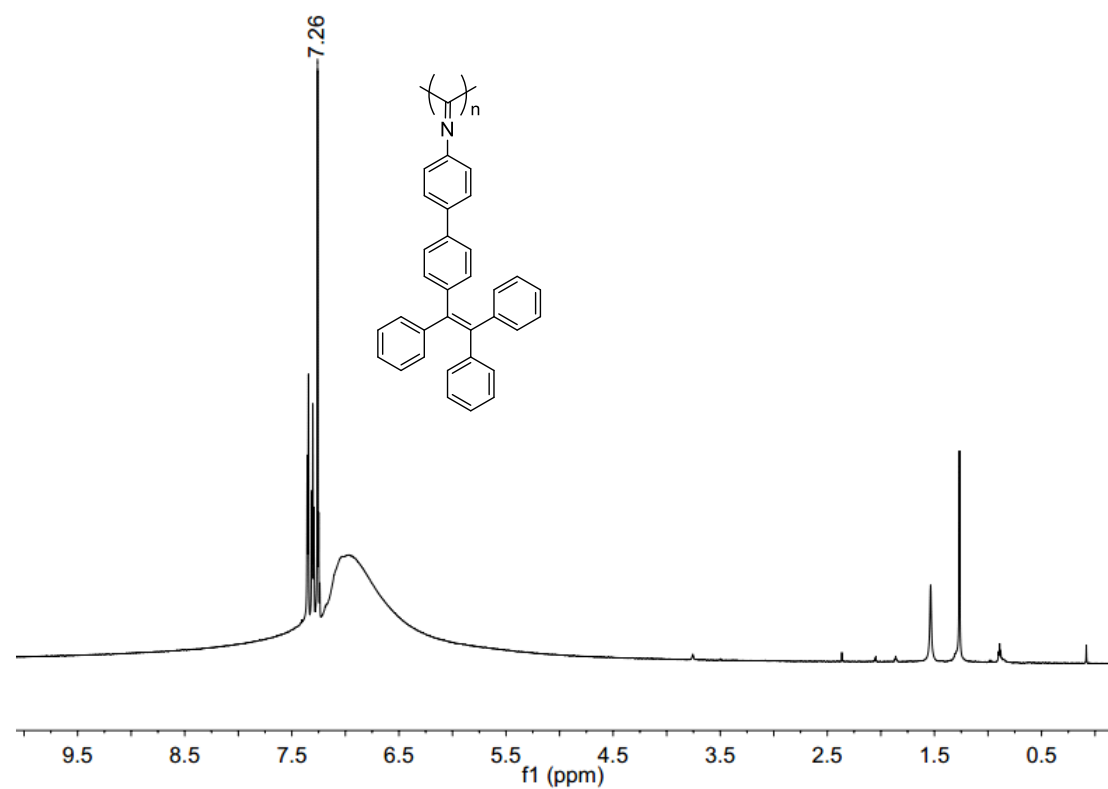

**Figure S21.**  $^1\text{H}$  NMR spectrum of poly(ITPB) in entry 22, Table 1.

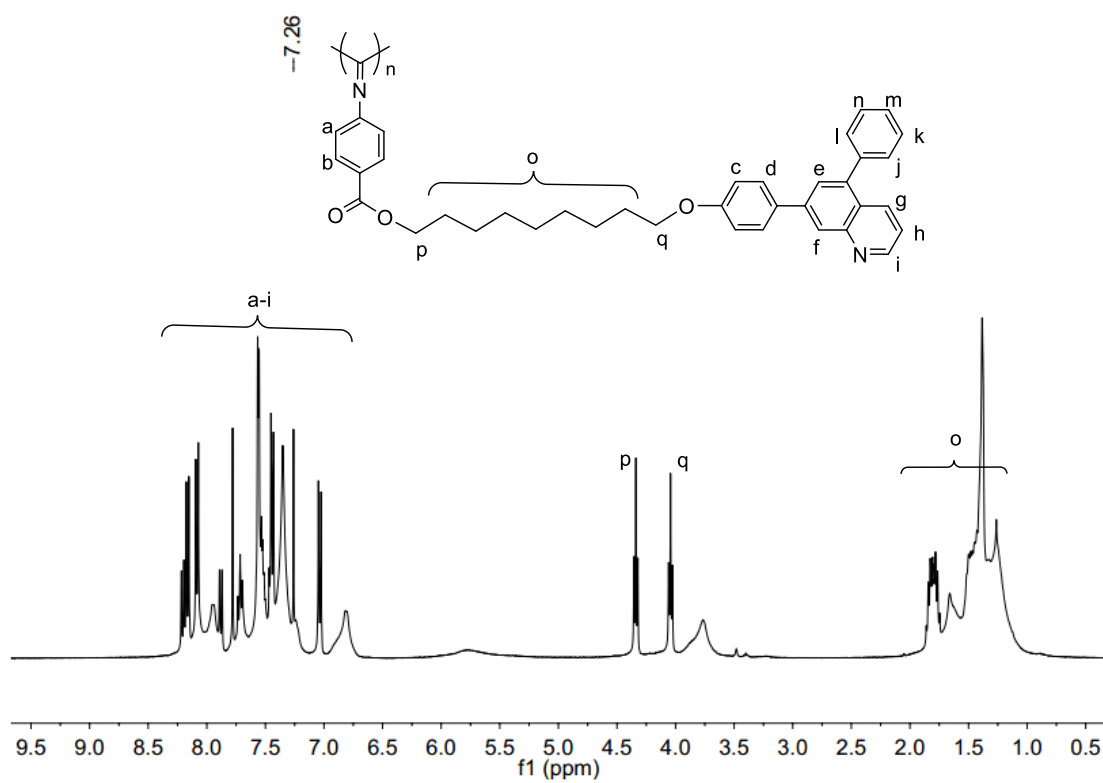

**Figure S22.**  $^1\text{H}$  NMR spectrum of poly(BNB) in entry 24, Table 1.

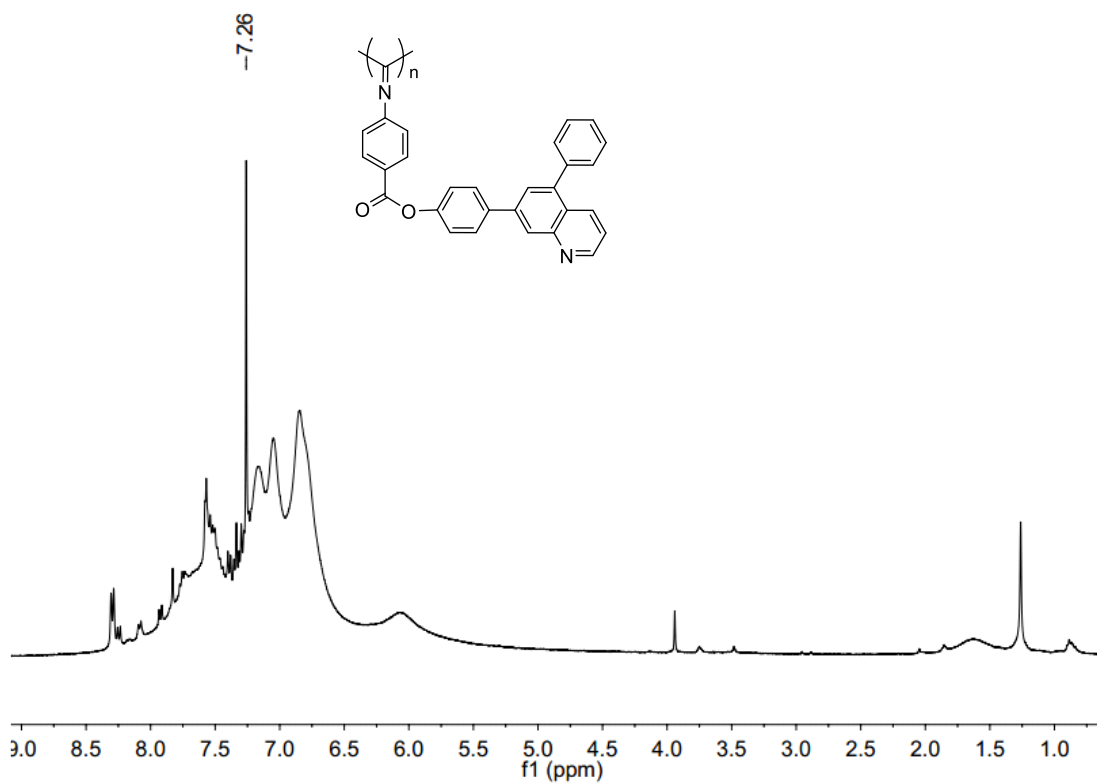

**Figure S23.**  $^1\text{H}$  NMR spectrum of poly(PQPI) in entry 25, Table 1.

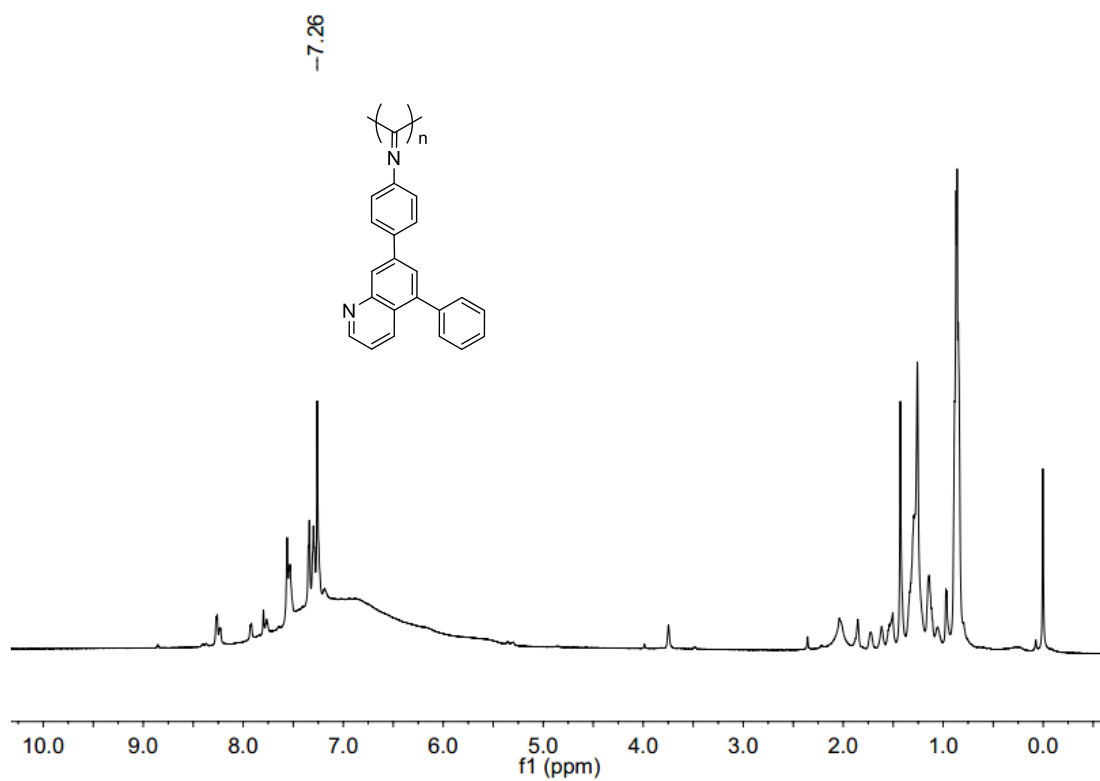

**Figure S24.** <sup>1</sup>H NMR spectrum of poly(IPQ) in entry 26, Table 1.

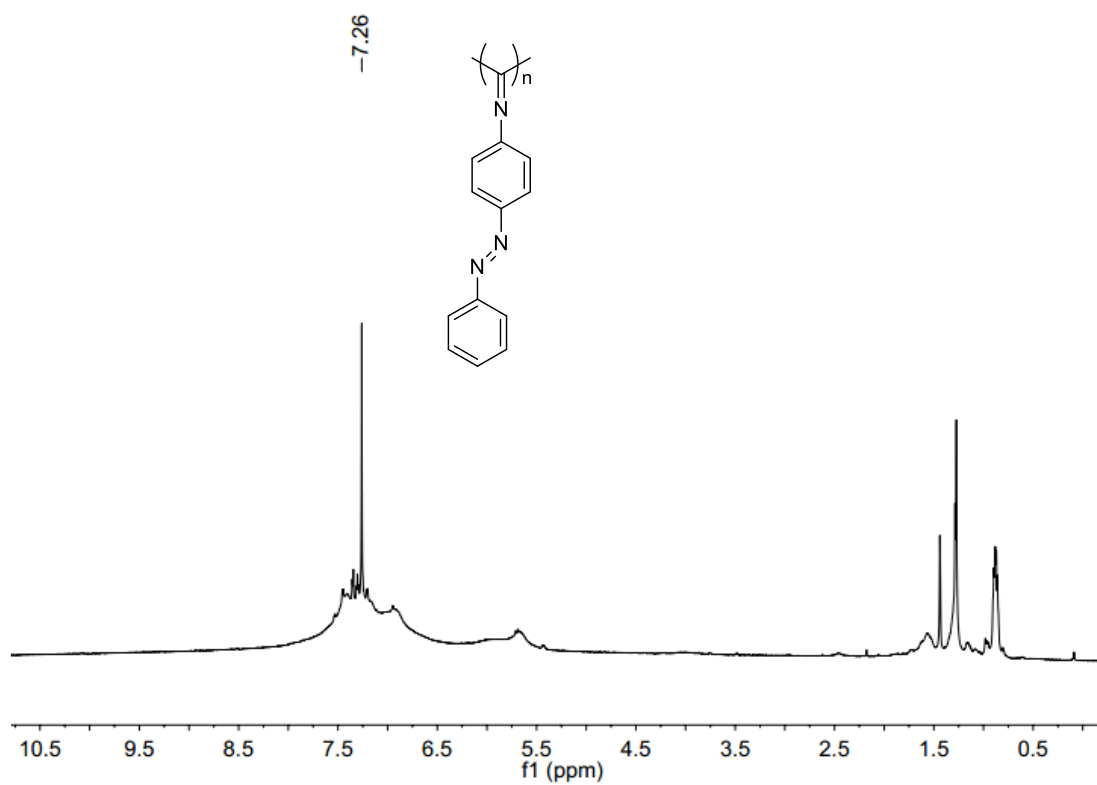

**Figure S25.** <sup>1</sup>H NMR spectrum of poly(IPD) in entry 28 Table 1.

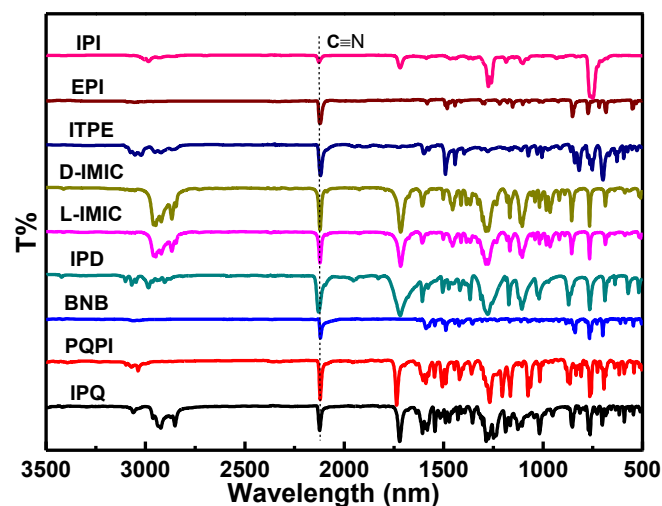

**Figure S26.** FT-IR spectra of isocyanide monomers EPI (b), IPI (c), D/L-IMCI (d/e), ITPB (f), BNB (g), PQPI (h), IPQ (i), IPD (j).

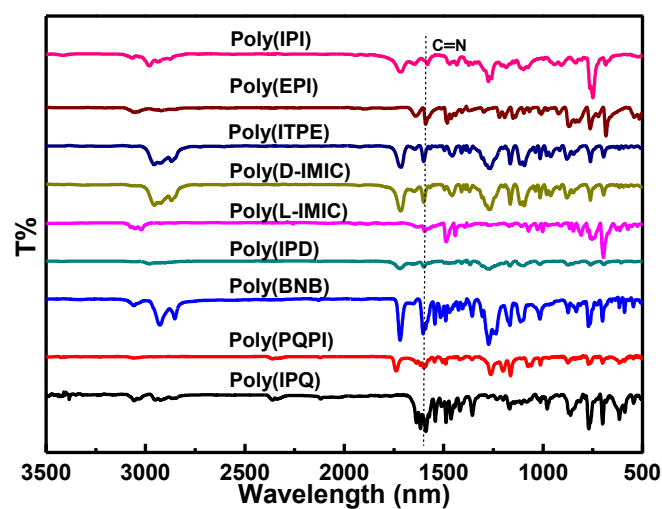

**Figure S27.** FT-IR spectra of poly(EPI) (Table 1, entry 1), poly(IPI) (Table1, entry17), poly(D-IMCI) (Table 1, entry 18), poly(L-IMCI) (Table 1, entry 20), poly(ITPB) (Table 1, entry 22), poly(BNB) (Table 1, entry 24), poly(PQPI) (Table 1, entry 25), poly(IPQ) (Table 1, entry 26), poly(IPD) (Table 1, entry 28).

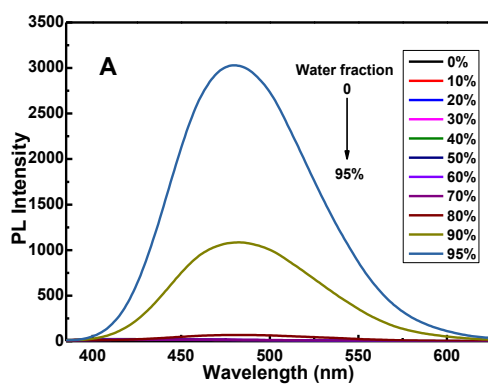

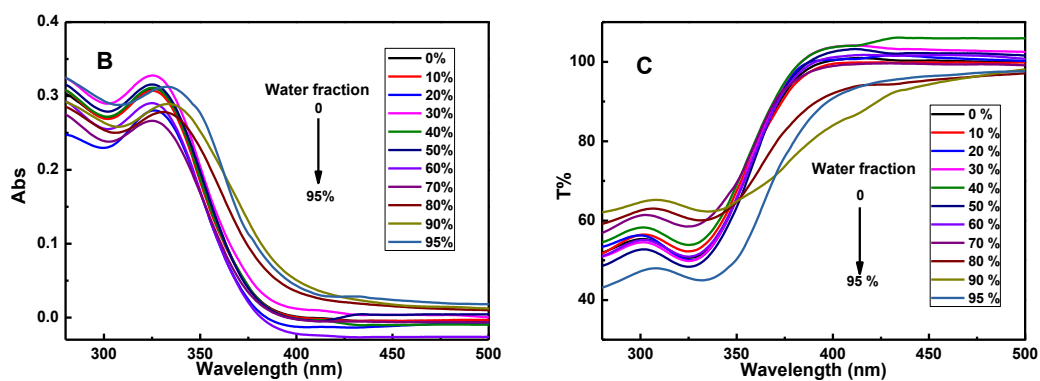

**Figure S28.** Fluorescence spectra and UV absorption-transmittance spectra of ITPB monomer (excitation wavelength: 325 nm; 0.004 mg/ml) in THF/water mixture.

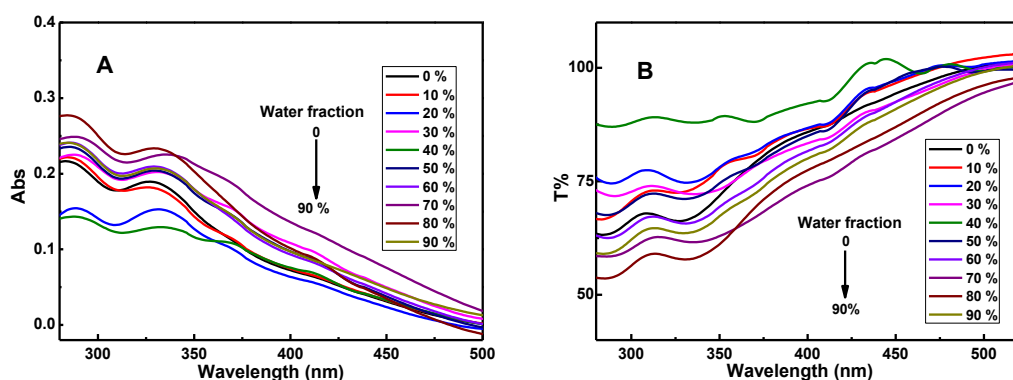

**Figure S29.** UV absorption and transmittance spectra of poly(ITPB) (Table 1, entry 20) (0.004 mg/ml) in THF/water mixture.

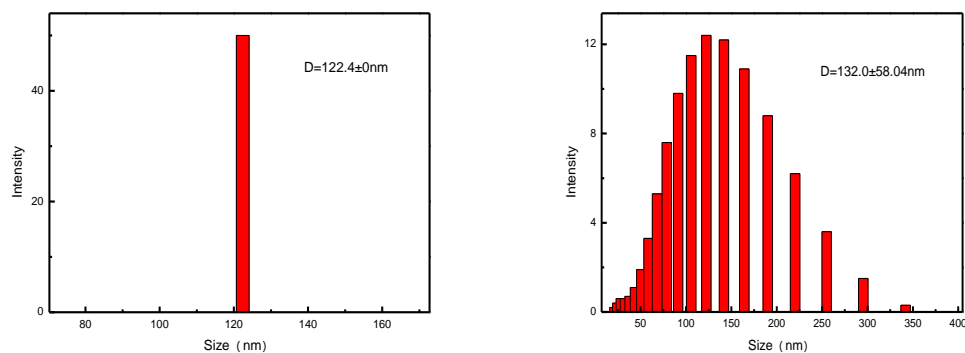

**Figure S30.** Dynamic light scattering measurement of ITPB monomer at 0 % water fraction in THF/water mixture (left side) and at 95 % water fraction in THF/water mixture (right side).

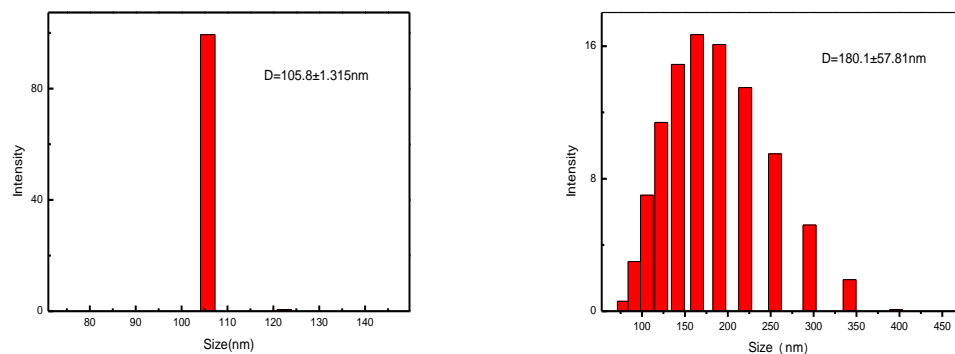

**Figure S31.** Dynamic light scattering measurement of poly(ITPB) (Table 1, entry 20) at 0 % water fraction in THF/water mixture (left side) and at 70% water fraction in THF/water mixture (right side).

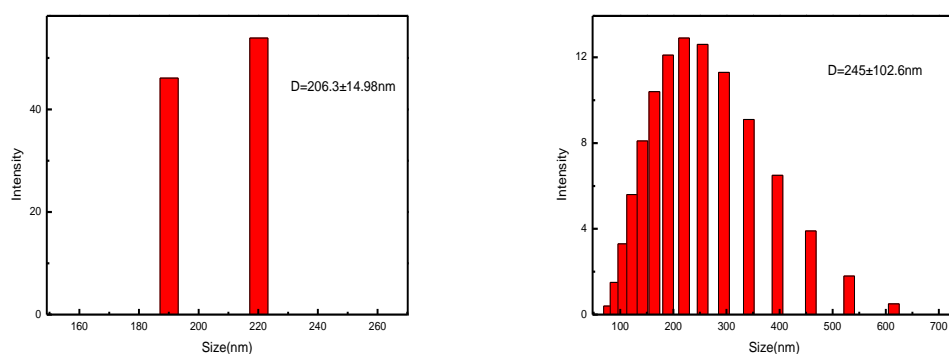

**Figure S32.** Dynamic light scattering measurement of poly(D-IMCI-co-ITPB) (Table 2, entry 2) at 0 % water fraction in THF/water mixture (left side) and at 70% water fraction in THF/water mixture (right side).

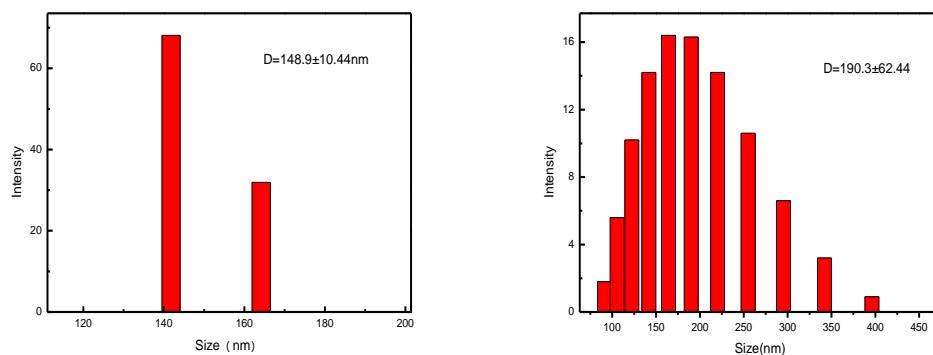

**Figure S33.** Dynamic light scattering measurement of poly(L-IMCI-co-ITPB) (Table 2, entry 8) at 0 % water fraction in THF/water mixture (left side) and at 70% water fraction in THF/water mixture (right side).



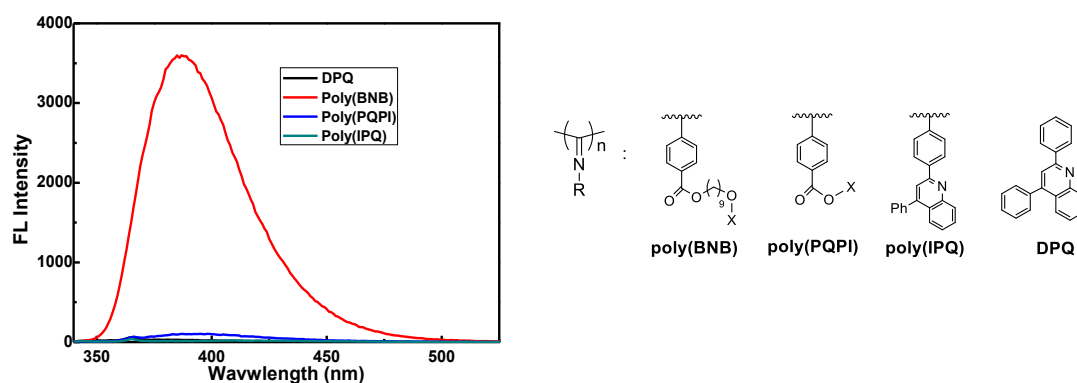

**Figure S34.** Fluorescence spectra of DPQ unit, poly(BNB), poly(PQPI), poly(IPQ) (repeat unit  $10^{-5}$  M) in THF.

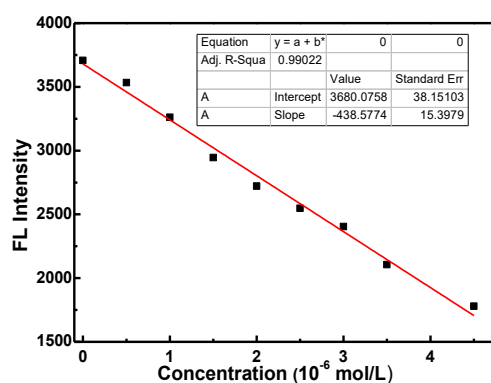

**Figure S35.** A plot of fluorescence intensity as a function of the iron concentration ( $5 \times 10^{-7}$ – $4.5 \times 10^{-6}$  M) in THF.

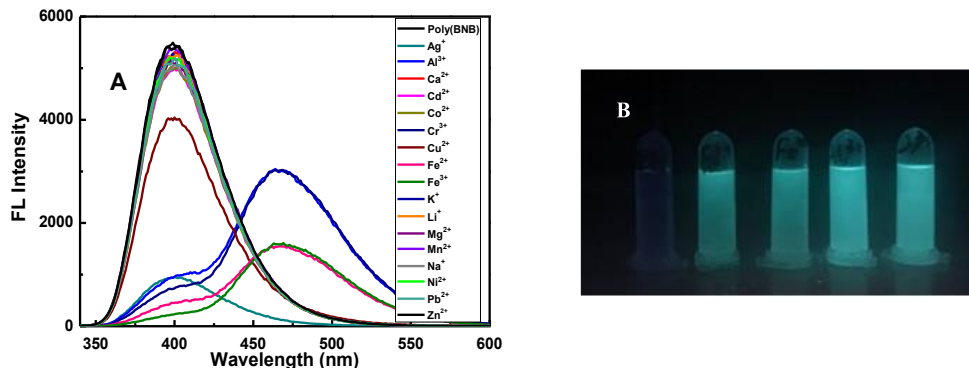

**Figure S36.** (A) Fluorescence spectra of poly(BNB) (Table 1, entry 24) ( $10^{-5}$  M repeat unit) in the absence (blank) and presence of different metal salts ( $10^{-5}$  M) in MeOH; (B) Fluorescence emission of poly(BNB) ( $10^{-5}$  M repeat unit) in MeOH with  $\text{Al}^{3+}$ ,  $\text{Cr}^{3+}$ ,  $\text{Fe}^{3+}$ , and  $\text{Fe}^{2+}$  ( $10^{-5}$  M), respectively, under UV lamp irradiation.

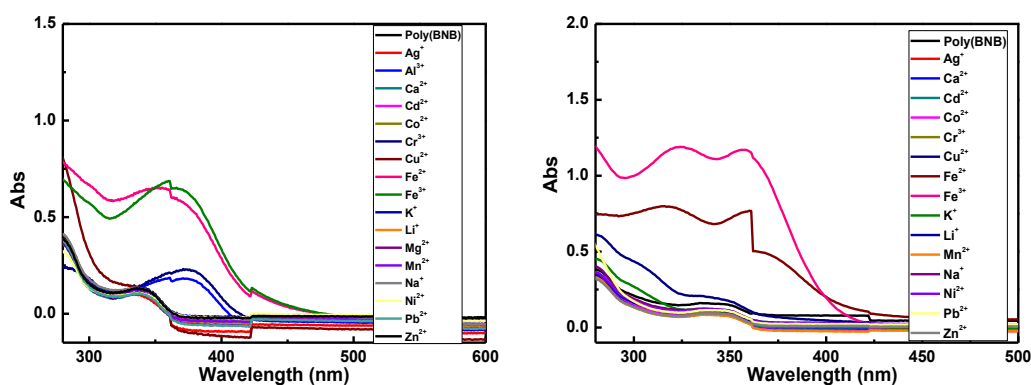

**Figure S37.** UV absorption spectra of poly(BNB) ( $10^{-5}$  M) and poly(BNB) ( $10^{-5}$  M) with different metal iron( $10^{-5}$  M) in MeOH(left) and THF(right).

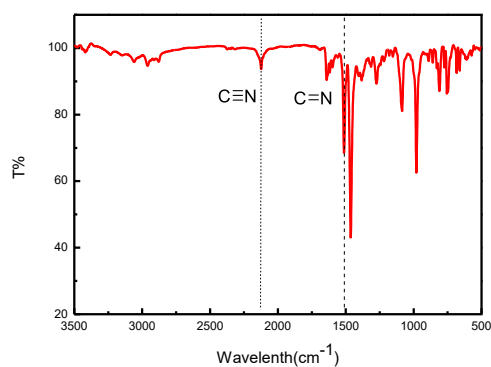

**Figure S38.** FT-IR spectra of NI oligomer obtained by  $[(Et_3Si)_2H][B(C_6F_5)_4]$ .

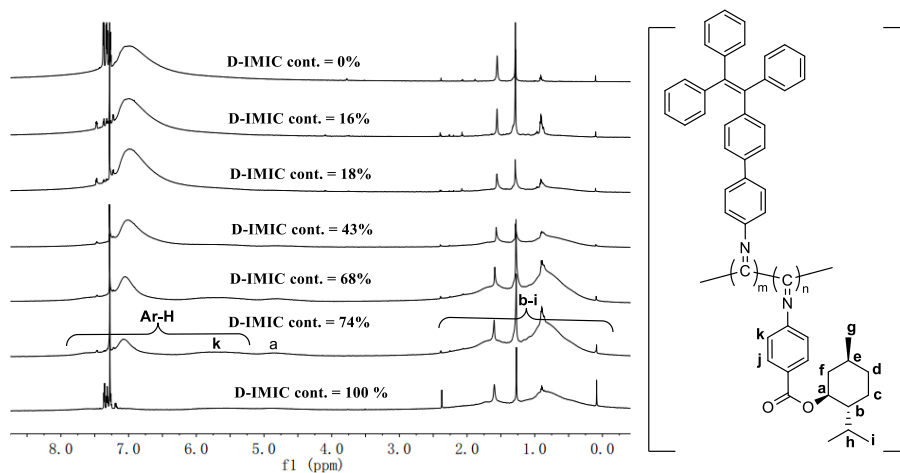

**Figure S39.**  $^1H$  NMR spectra of poly(D-IMCI), poly(ITPB) and poly(D-IMCI-co-ITPB)s and (Table 1, entries 18, 22 and Table 2, entries 1-5).

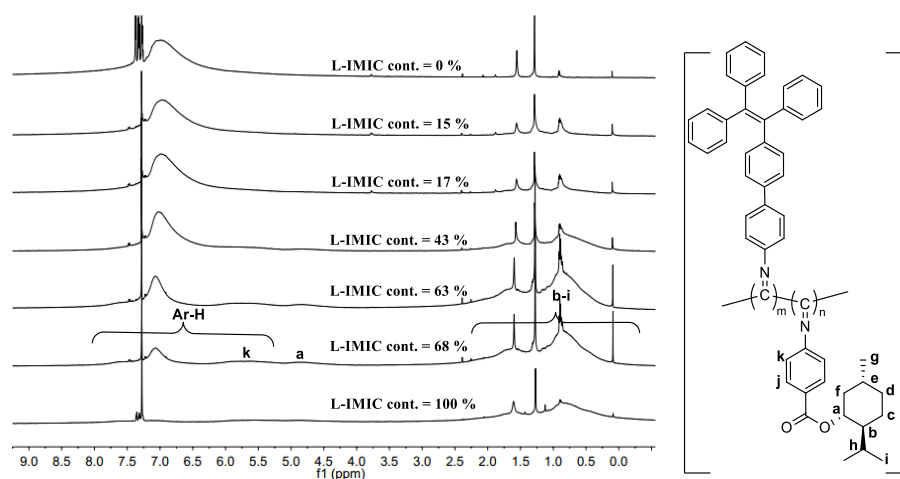

**Figure S40.**  $^1H$  NMR spectra of poly(L-IMCI), poly(ITPB) and poly(L-IMCI-co-ITPB)s (Table 1, entries 20, 22 and Table 2, entries 6-10).

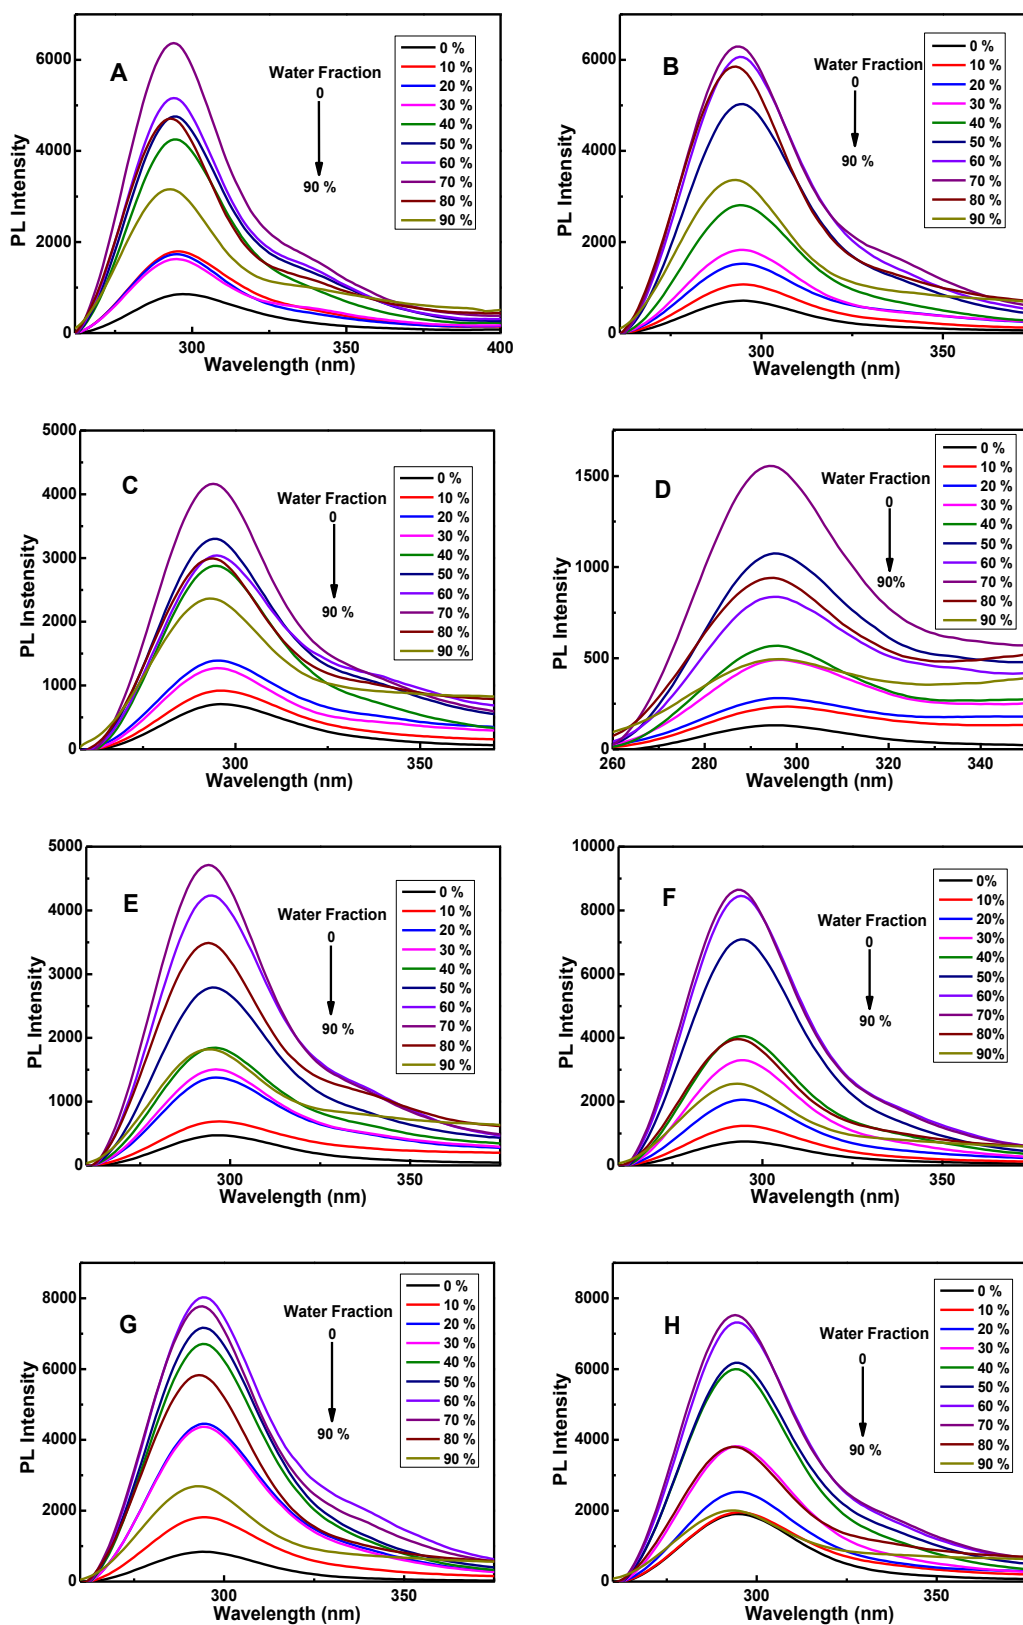

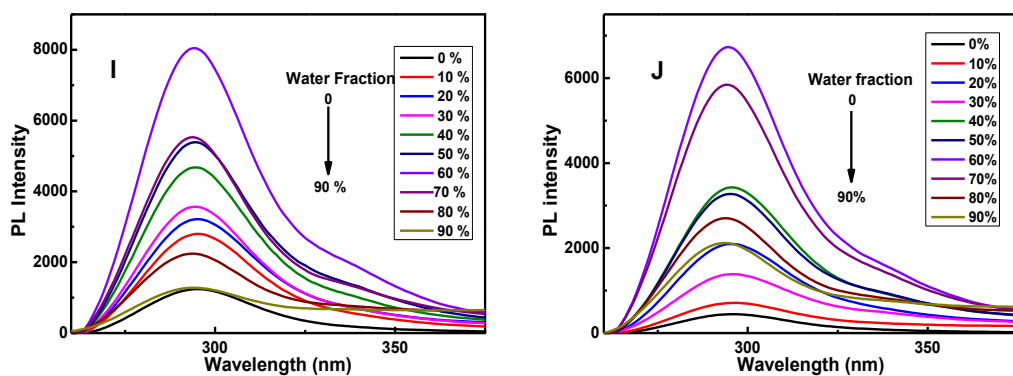

**Figure S41.** Fluorescence spectra of poly(D/L-IMCI-co-ITPB) (table 2, entry1-10) in THF/water mixture (excitation wavelength: 220 nm; copolymer: A (Table 2, entry 1), B (Table 2, entry 2), F (Table 2, entry 6), G (Table 2, entry 7): 0.005 mg/ml; C (Table 2, entry 3), H (Table 2, entry 8): 0.0065 mg/ml; D (Table 2, entry 4), I (Table 2, entry 9): 0.010 mg/ml; E (Table 2, entry 5), J (Table 2, entry 10): 0.015 mg/ml).

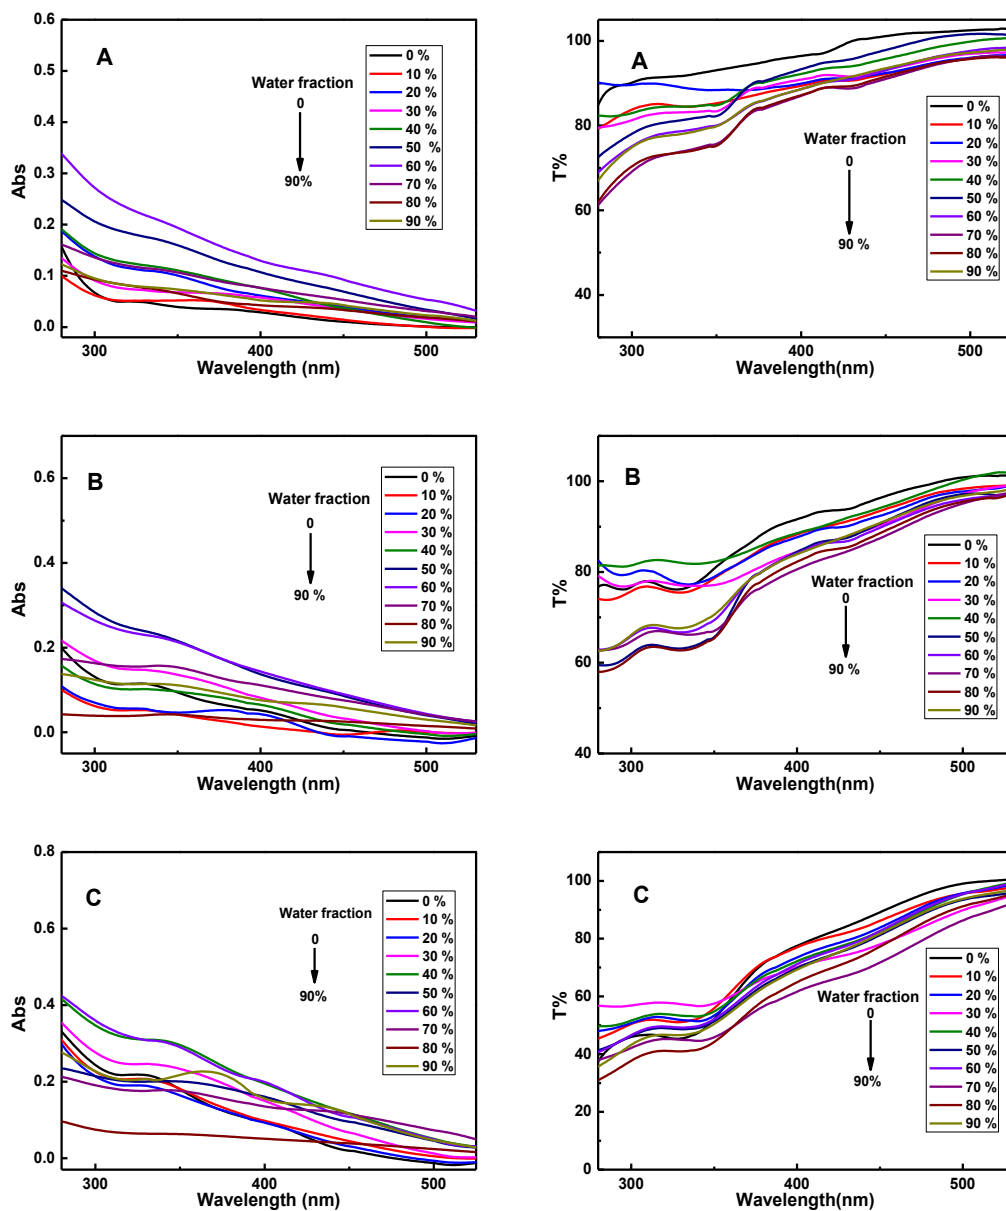

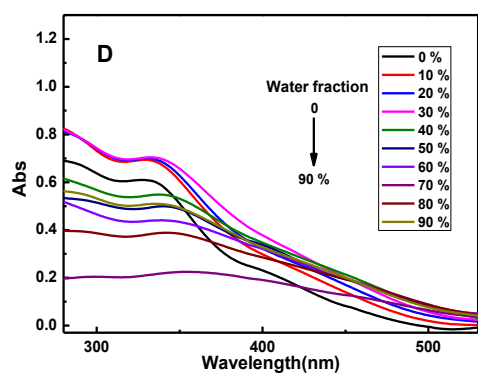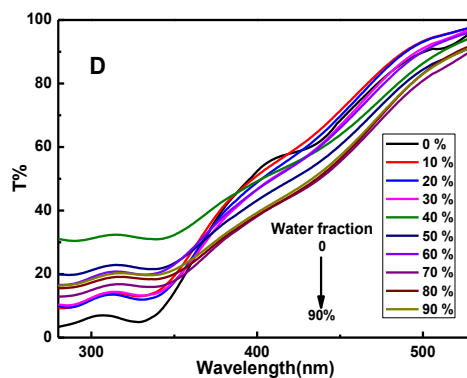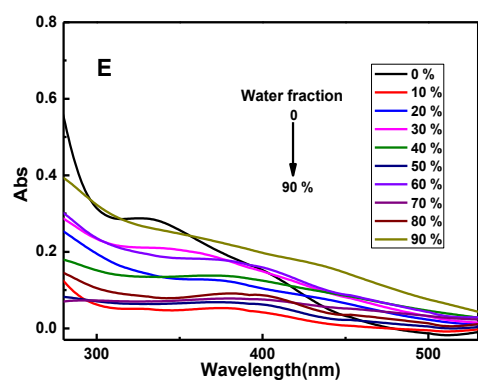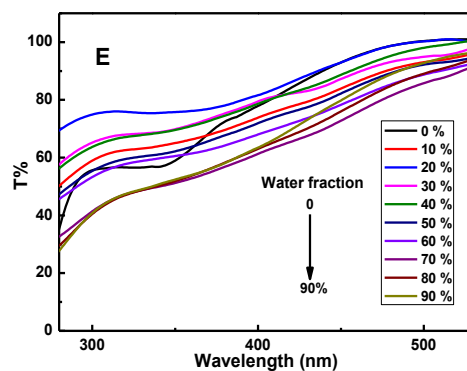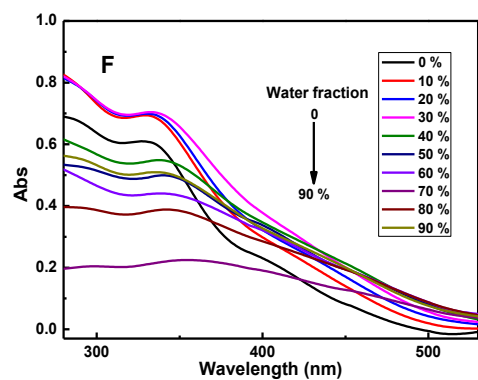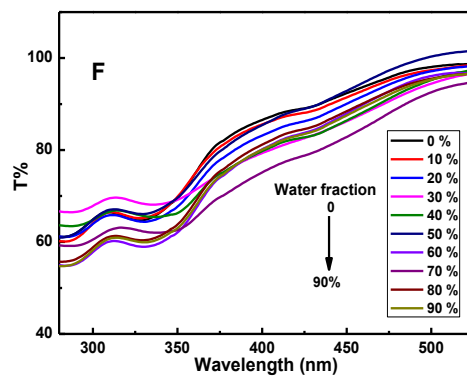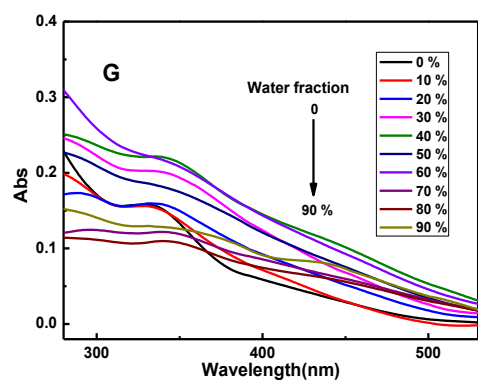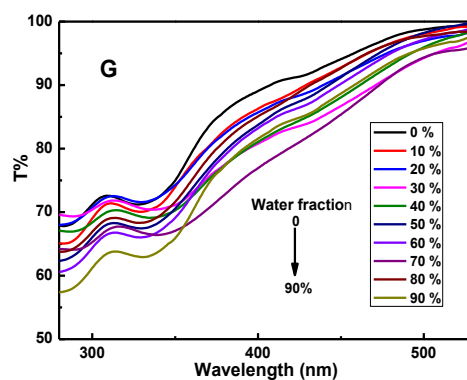

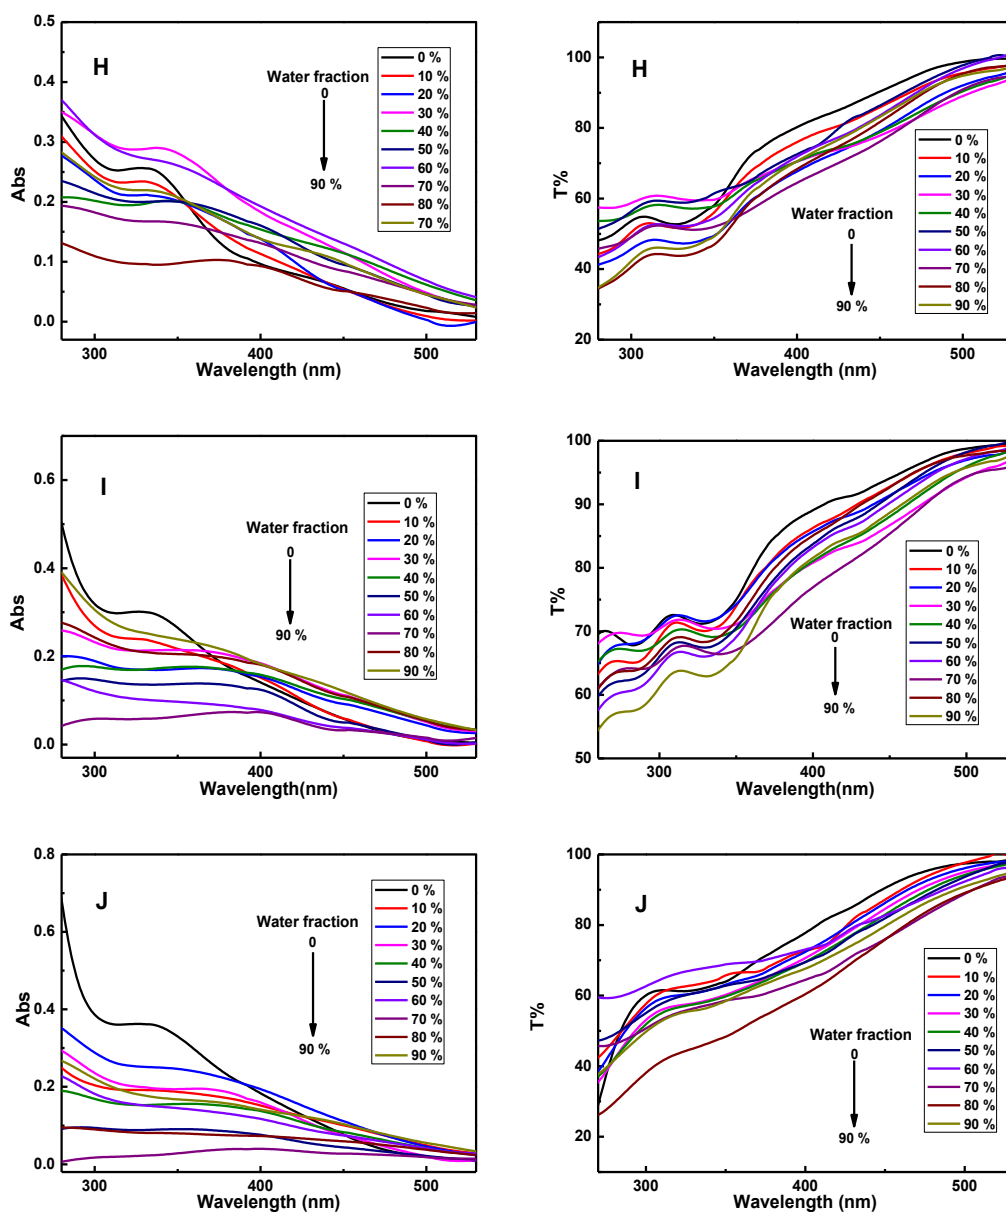

**Figure S42.** UV absorption and transmittance spectra of poly(D/L-IMCI-co-ITPB) (table 2, entry 1-10) in THF/water mixture (copolymer: A (Table 2, entry 1), B (Table 2, entry 2), F (Table 2, entry 6), G (Table 2, entry 7): 0.005 mg/ml; C (Table 2, entry 3), H (Table 2, entry 8): 0.0065 mg/ml; D (Table 2, entry 4), I (Table 2, entry 9): 0.010 mg/ml; E (Table 2, entry 5), J (Table 2, entry 10): 0.015 mg/ml).

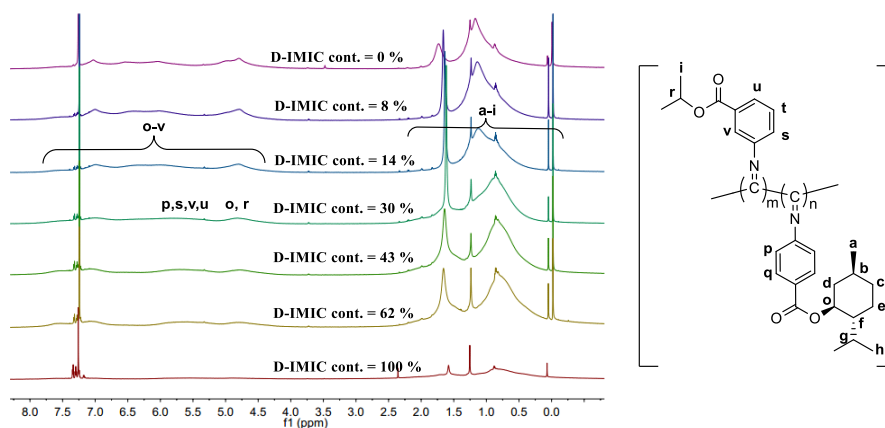

**Figure S43.**  $^1\text{H}$  NMR spectra of poly(IPI), poly(D-IMCI) and poly(D-IMCI-co-IPI)s (Table 1, entries 17, 18 and Table 2, entries 11-15).

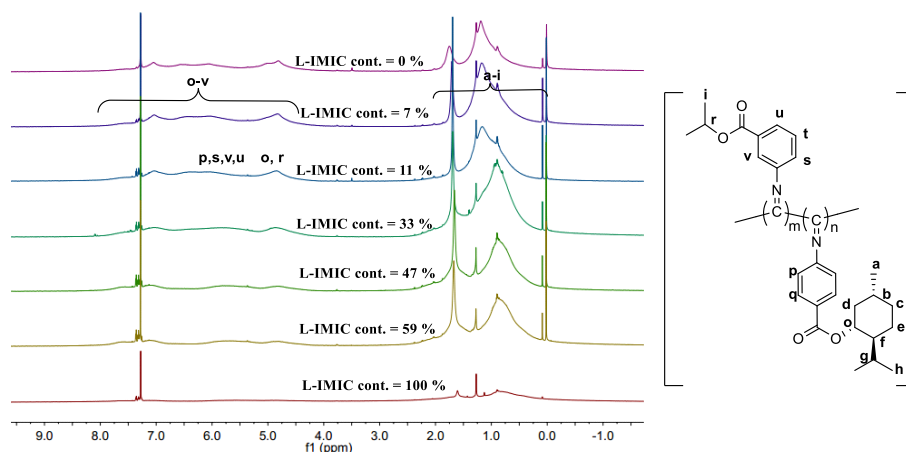

**Figure S44.**  $^1\text{H}$  NMR spectra of poly(IPI), poly(L-IMCI) and poly(L-IMCI-co-IPI)s (Table 1, entries 17, 20 and Table 2, entries 16-20).

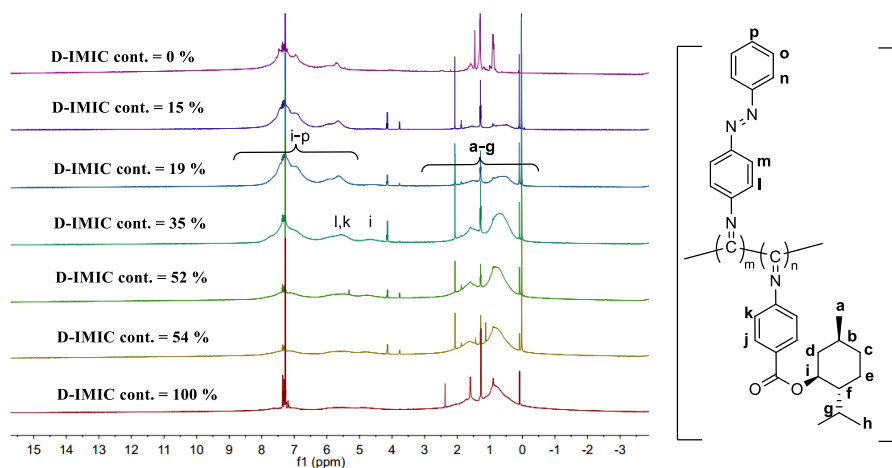

**Figure S45.**  $^1\text{H}$  NMR spectra of poly(D-IMCI), poly(IPD) and poly(D-IMCI-co-IPD)s (Table 1, entries 18, 28 and Table 2, entries 21-25).

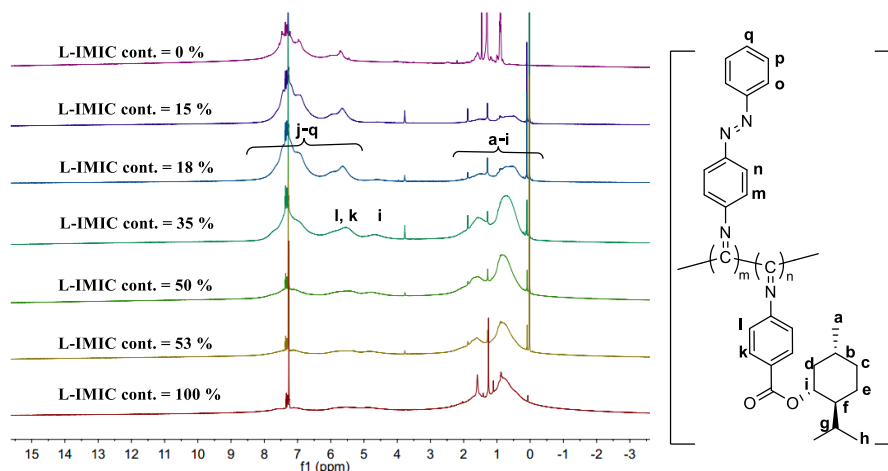

**Figure S46.**  $^1\text{H}$  NMR spectra of poly(L-IMCI), poly(IPD) and poly(L-IMCI-co-IPD)s (Table 1, entries 20, 28 and Table 2, entries 26-30).

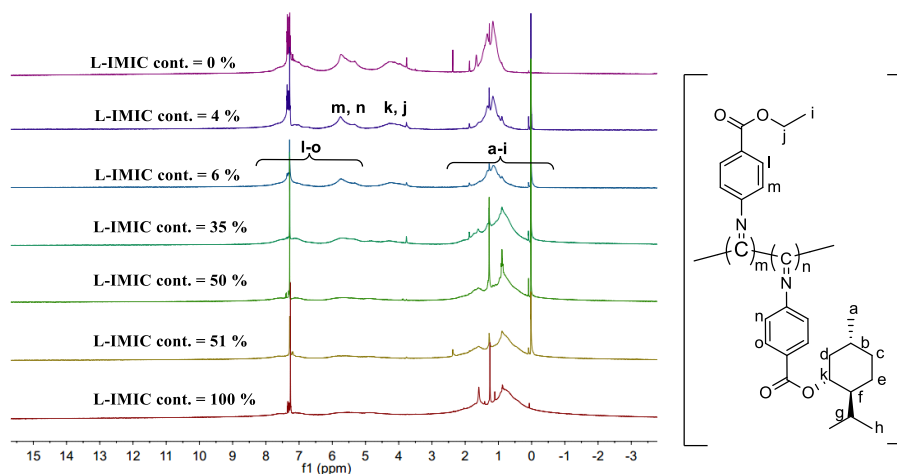

**Figure S47.**  $^1\text{H}$  NMR spectra of poly(L-IMICl), poly(EPI) and poly(L-IMIC-co-EPI)s (Table 1, entries 20, 1 and Table 2, entries 31-35).

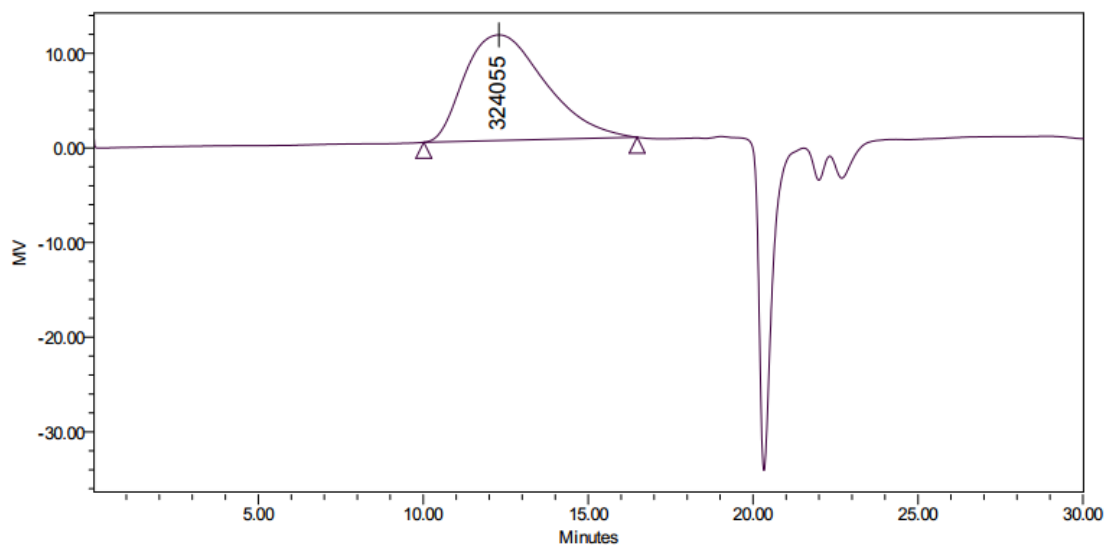

**Broad Unknown Modified Universal Peak Table**

|   | Distribution Name | Mv (Daltons) | K (dl/g) | alpha | Intrinsic Viscosity (dl/g) | Mn (Daltons) | Mw (Daltons) | MP (Daltons) | Mz (Daltons) | Mz+1 (Daltons) | Polydispersity | Mz/Mw    |
|---|-------------------|--------------|----------|-------|----------------------------|--------------|--------------|--------------|--------------|----------------|----------------|----------|
| 1 |                   |              |          |       |                            | 99380        | 419555       | 324055       | 973823       | 1553064        | 4.221743       | 2.321087 |

**Figure S48.** GPC curve of poly(EPI) in Table 1, entry 1.



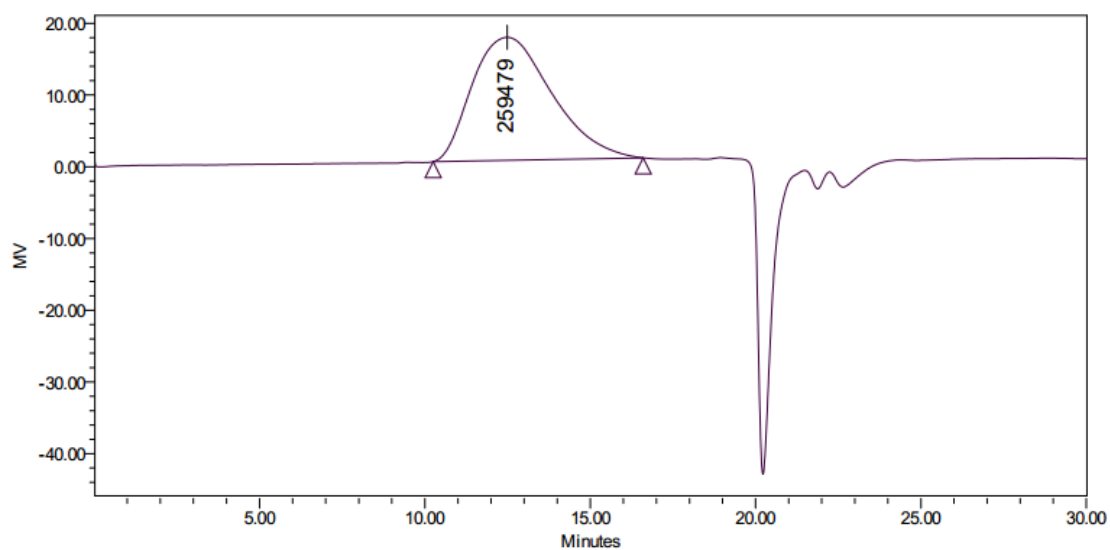

**Broad Unknown n Modified Universal Peak Table**

|   | Distribution Name | Mv (Daltons) | K (dl/g) | alpha | Intrinsic Viscosity (dl/g) | Mn (Daltons) | Mw (Daltons) | MP (Daltons) | Mz (Daltons) | Mz+1 (Daltons) | Polydispersity | Mz/Mw    |
|---|-------------------|--------------|----------|-------|----------------------------|--------------|--------------|--------------|--------------|----------------|----------------|----------|
| 1 |                   |              |          |       |                            | 89614        | 353163       | 259479       | 807066       | 1275883        | 3.940943       | 2.285252 |

**Figure S49.** GPC curve of poly(EPI) in Table 1, entry 2.

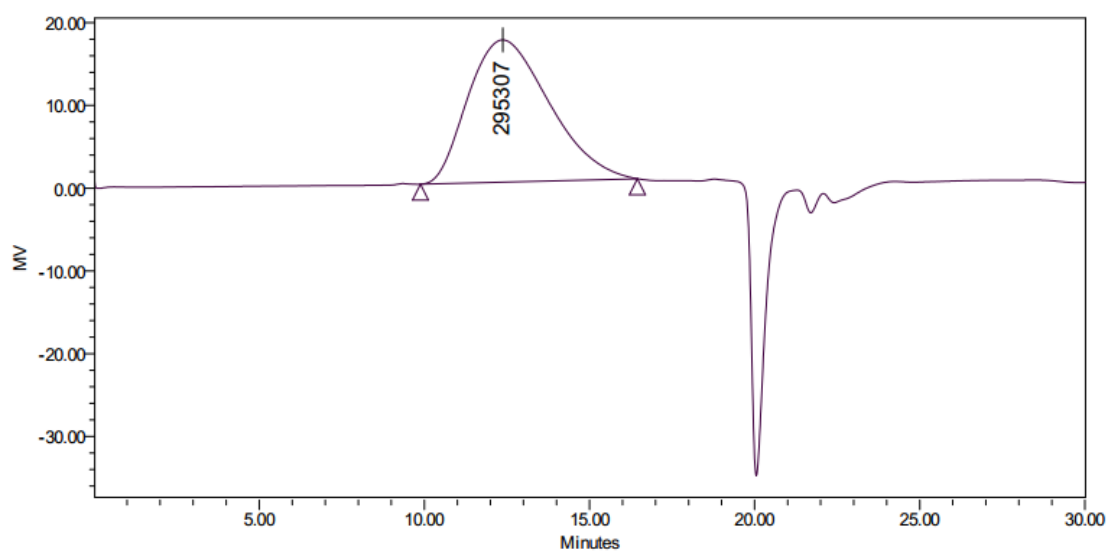

**Broad Unknown n Modified Universal Peak Table**

|   | Distribution Name | Mv (Daltons) | K (dl/g) | alpha | Intrinsic Viscosity (dl/g) | Mn (Daltons) | Mw (Daltons) | MP (Daltons) | Mz (Daltons) | Mz+1 (Daltons) | Polydispersity | Mz/Mw    |
|---|-------------------|--------------|----------|-------|----------------------------|--------------|--------------|--------------|--------------|----------------|----------------|----------|
| 1 |                   |              |          |       |                            | 95602        | 405689       | 295307       | 1011338      | 1701846        | 4.243529       | 2.492891 |

**Figure S50.** GPC curve of poly(EPI) in Table 1, entry 3.

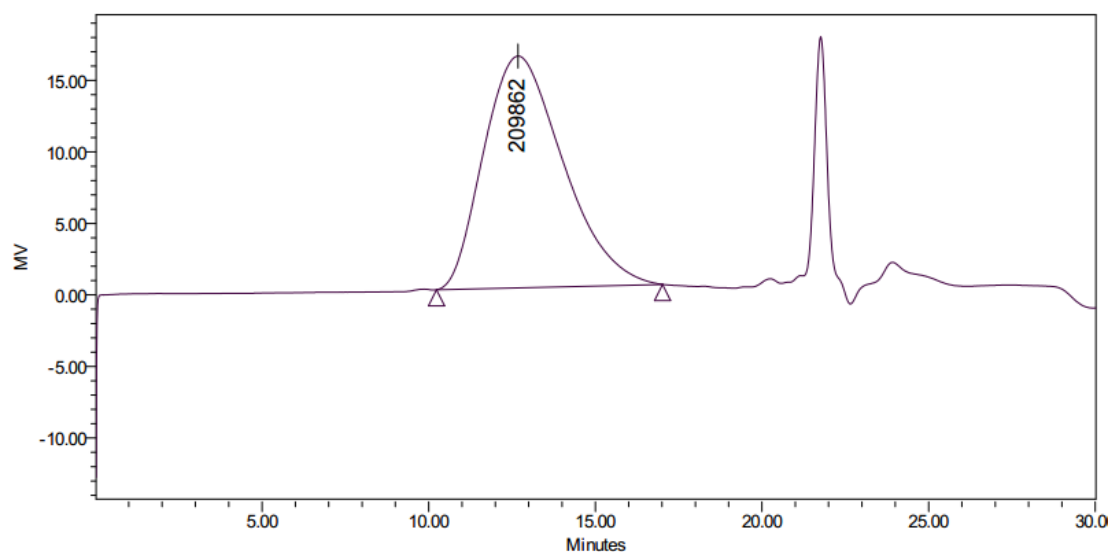

**Broad Unknown Modified Universal Peak Table**

|   | Distribution Name | Mv (Daltons) | K (dl/g) | alpha | Intrinsic Viscosity (dl/g) | Mn (Daltons) | Mw (Daltons) | MP (Daltons) | Mz (Daltons) | Mz+1 (Daltons) | Polydispersity | Mz/Mw    |
|---|-------------------|--------------|----------|-------|----------------------------|--------------|--------------|--------------|--------------|----------------|----------------|----------|
| 1 |                   |              |          |       |                            | 69662        | 285021       | 209862       | 686674       | 1147514        | 4.091472       | 2.409201 |

**Figure S51.** GPC curve of poly(EPI) in Table 1, entry 4.

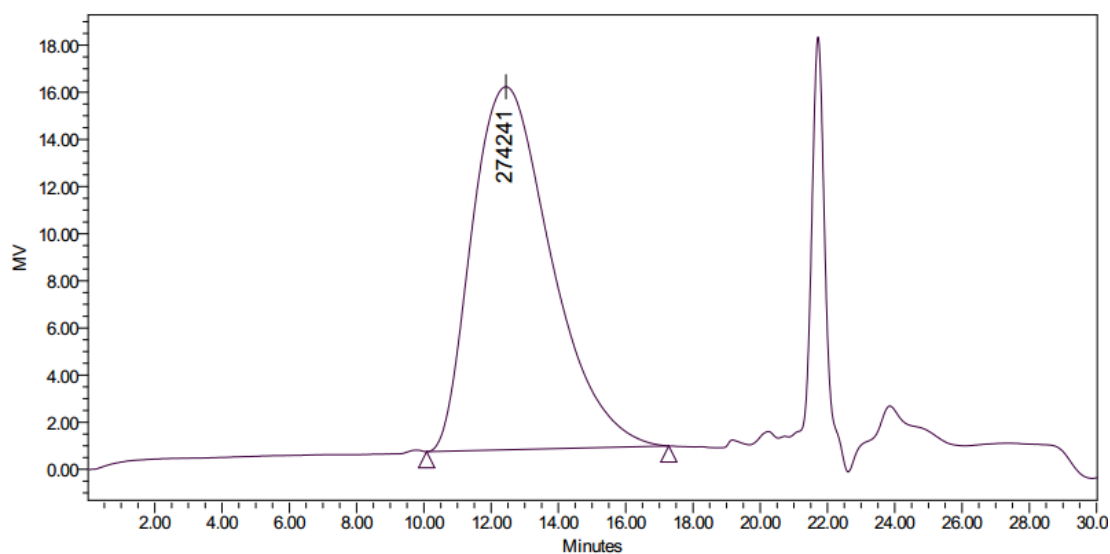

**Broad Unknown Modified Universal Peak Table**

|   | Distribution Name | Mv (Daltons) | K (dl/g) | alpha | Intrinsic Viscosity (dl/g) | Mn (Daltons) | Mw (Daltons) | MP (Daltons) | Mz (Daltons) | Mz+1 (Daltons) | Polydispersity | Mz/Mw    |
|---|-------------------|--------------|----------|-------|----------------------------|--------------|--------------|--------------|--------------|----------------|----------------|----------|
| 1 |                   |              |          |       |                            | 82143        | 354236       | 274241       | 810693       | 1302041        | 4.312433       | 2.288566 |

**Figure S52.** GPC curve of poly(EPI) in Table 1, entry 5.

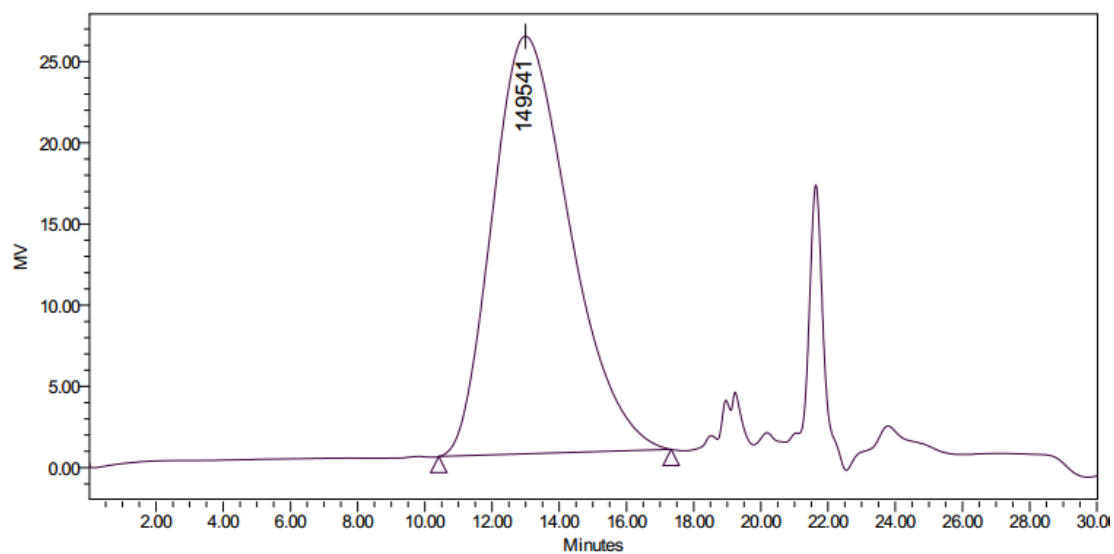

**Broad Unknown Modified Universal Peak Table**

|   | Distribution Name | Mv (Daltons) | K (dl/g) | alpha | Intrinsic Viscosity (dl/g) | Mn (Daltons) | Mw (Daltons) | MP (Daltons) | Mz (Daltons) | Mz+1 (Daltons) | Polydispersity | Mz/Mw    |
|---|-------------------|--------------|----------|-------|----------------------------|--------------|--------------|--------------|--------------|----------------|----------------|----------|
| 1 |                   |              |          |       |                            | 51452        | 196611       | 149541       | 473038       | 823767         | 3.821261       | 2.405962 |

**Figure S53.** GPC curve of poly(EPI) in Table 1, entry 6.

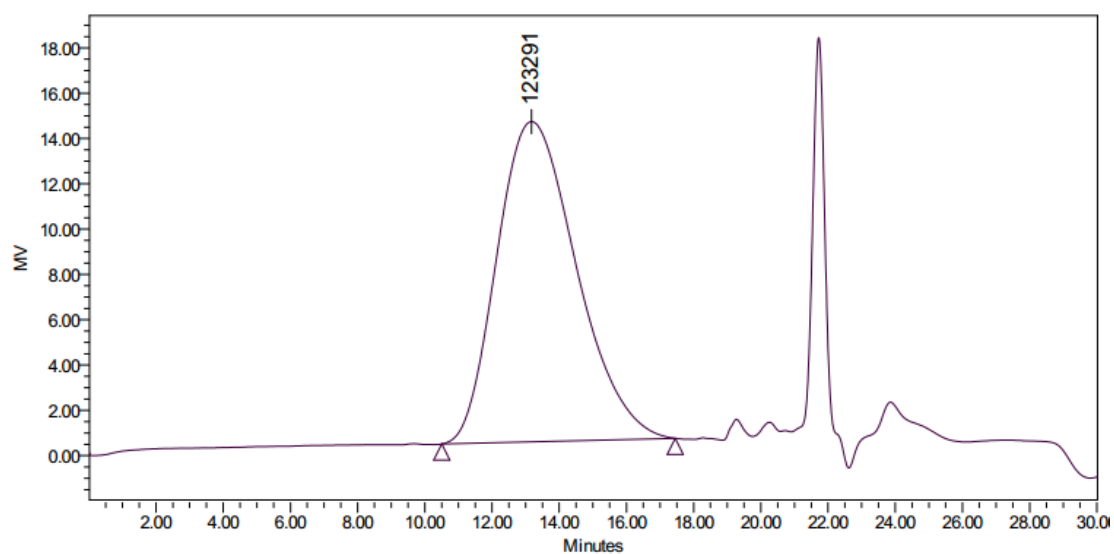

**Broad Unknown Modified Universal Peak Table**

|   | Distribution Name | Mv (Daltons) | K (dl/g) | alpha | Intrinsic Viscosity (dl/g) | Mn (Daltons) | Mw (Daltons) | MP (Daltons) | Mz (Daltons) | Mz+1 (Daltons) | Polydispersity | Mz/Mw    |
|---|-------------------|--------------|----------|-------|----------------------------|--------------|--------------|--------------|--------------|----------------|----------------|----------|
| 1 |                   |              |          |       |                            | 44653        | 168002       | 123291       | 409413       | 724300         | 3.762392       | 2.436954 |

**Figure S54.** GPC curve of poly(EPI) in Table 1, entry 7.

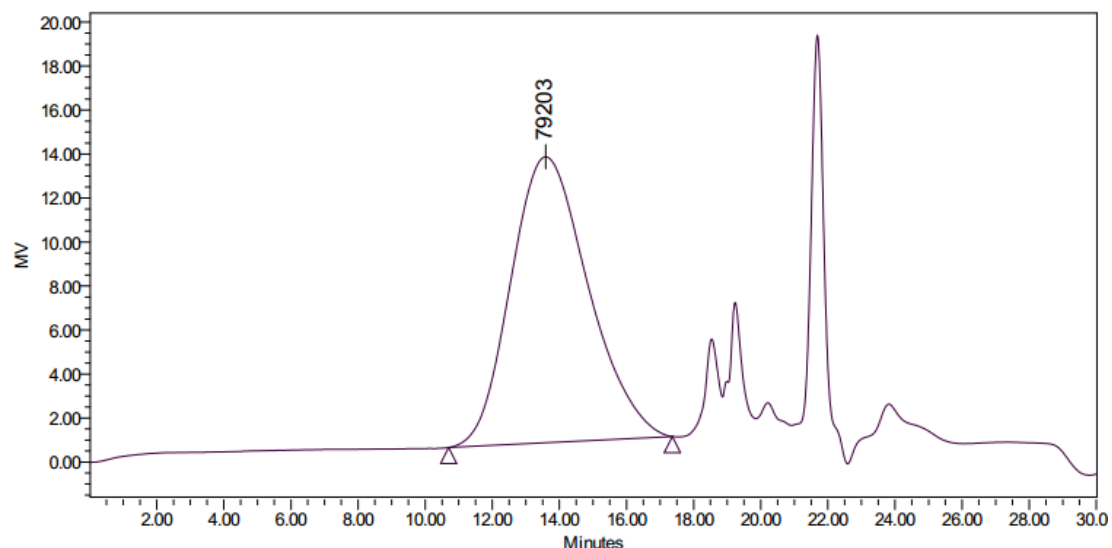

**Broad Unknown Modified Universal Peak Table**

|   | Distribution Name | Mv (Daltons) | K (dl/g) | alpha | Intrinsic Viscosity (dl/g) | Mn (Daltons) | Mw (Daltons) | MP (Daltons) | Mz (Daltons) | Mz+1 (Daltons) | Polydispersity | Mz/Mw    |
|---|-------------------|--------------|----------|-------|----------------------------|--------------|--------------|--------------|--------------|----------------|----------------|----------|
| 1 |                   |              |          |       |                            | 33069        | 113144       | 79203        | 284615       | 541335         | 3.421436       | 2.515507 |

**Figure S55.** GPC curve of poly(EPI) in Table 1, entry 8.

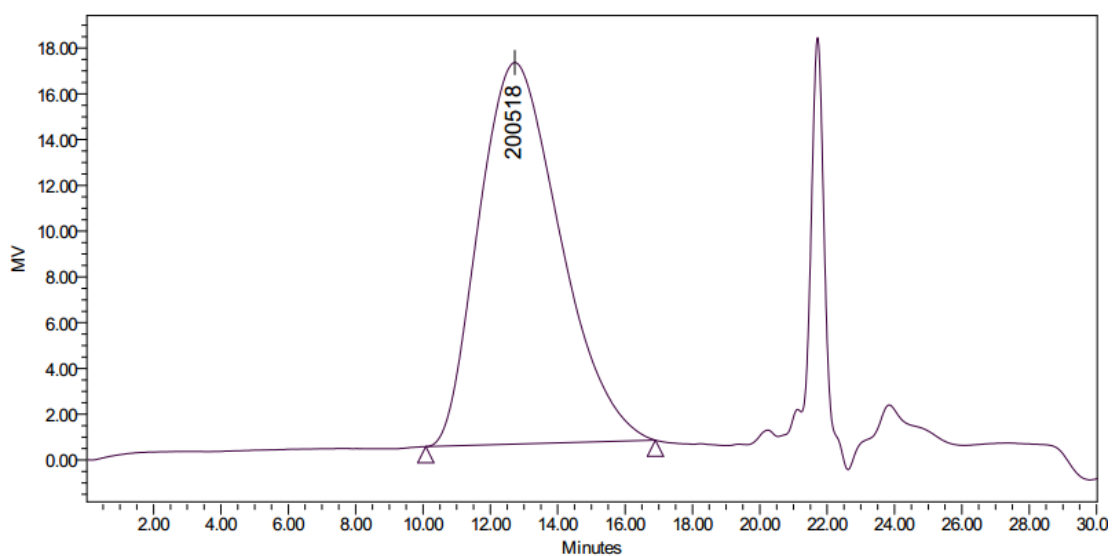

**Broad Unknown Modified Universal Peak Table**

|   | Distribution Name | Mv (Daltons) | K (dl/g) | alpha | Intrinsic Viscosity (dl/g) | Mn (Daltons) | Mw (Daltons) | MP (Daltons) | Mz (Daltons) | Mz+1 (Daltons) | Polydispersity | Mz/Mw    |
|---|-------------------|--------------|----------|-------|----------------------------|--------------|--------------|--------------|--------------|----------------|----------------|----------|
| 1 |                   |              |          |       |                            | 69470        | 285287       | 200518       | 711086       | 1217921        | 4.106645       | 2.492531 |

**Figure S56.** GPC curve of poly(EPI) in Table 1, entry 9.

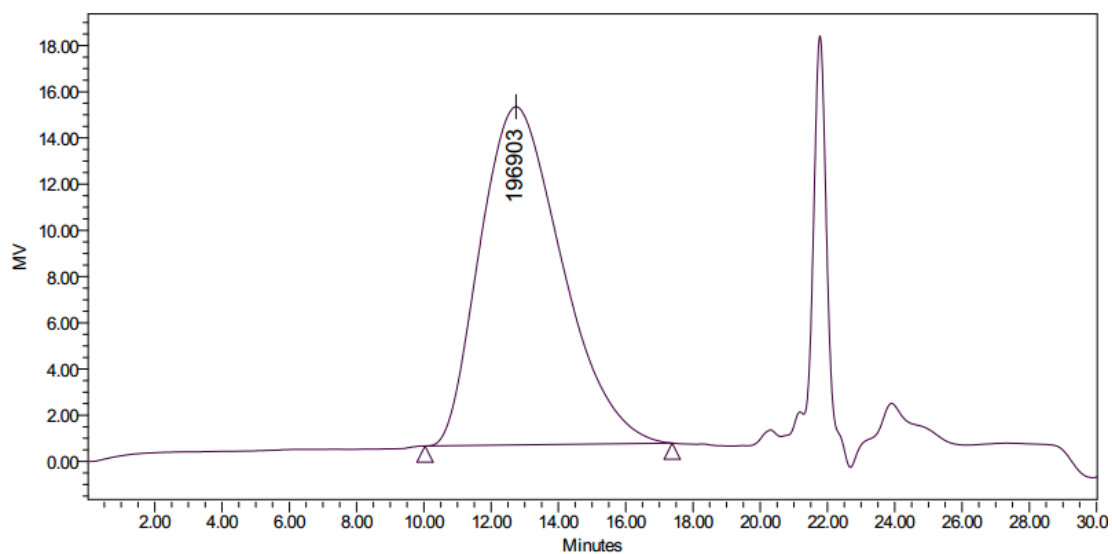

**Broad Unknown Modified Universal Peak Table**

|   | Distribution Name | Mv (Daltons) | K (dl/g) | alpha | Intrinsic Viscosity (dl/g) | Mn (Daltons) | Mw (Daltons) | MP (Daltons) | Mz (Daltons) | Mz+1 (Daltons) | Polydispersity | Mz/Mw    |
|---|-------------------|--------------|----------|-------|----------------------------|--------------|--------------|--------------|--------------|----------------|----------------|----------|
| 1 |                   |              |          |       |                            | 63333        | 278039       | 196903       | 694242       | 1183795        | 4.390093       | 2.496919 |

**Figure S57.** GPC curve of poly(EPI) in Table 1, entry 10.

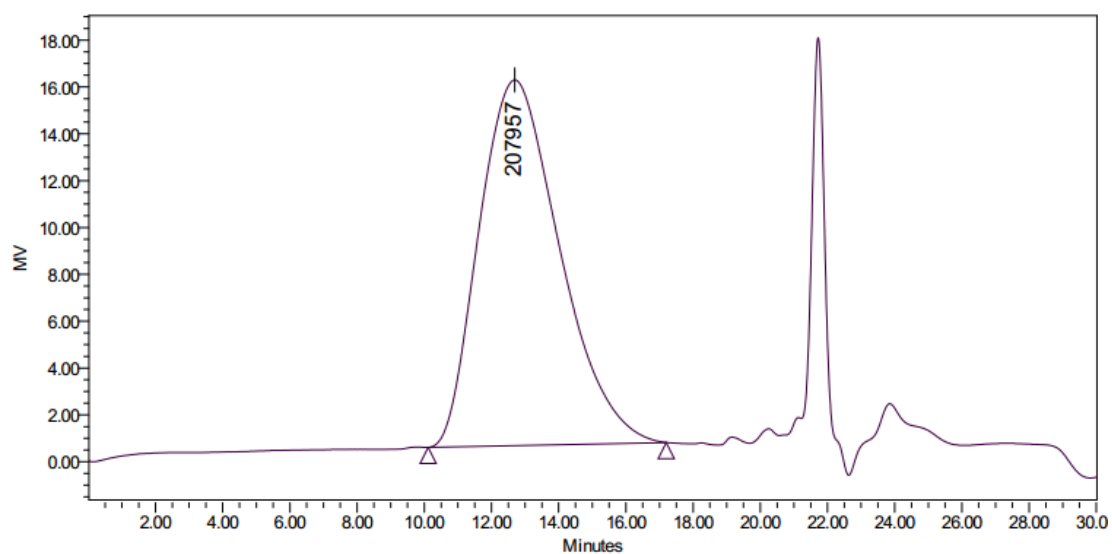

**Broad Unknown Modified Universal Peak Table**

|   | Distribution Name | Mv (Daltons) | K (dl/g) | alpha | Intrinsic Viscosity (dl/g) | Mn (Daltons) | Mw (Daltons) | MP (Daltons) | Mz (Daltons) | Mz+1 (Daltons) | Polydispersity | Mz/Mw    |
|---|-------------------|--------------|----------|-------|----------------------------|--------------|--------------|--------------|--------------|----------------|----------------|----------|
| 1 |                   |              |          |       |                            | 69720        | 293069       | 207957       | 717670       | 1213443        | 4.203489       | 2.448806 |

**Figure S58.** GPC curve of poly(EPI) in Table 1, entry 11.

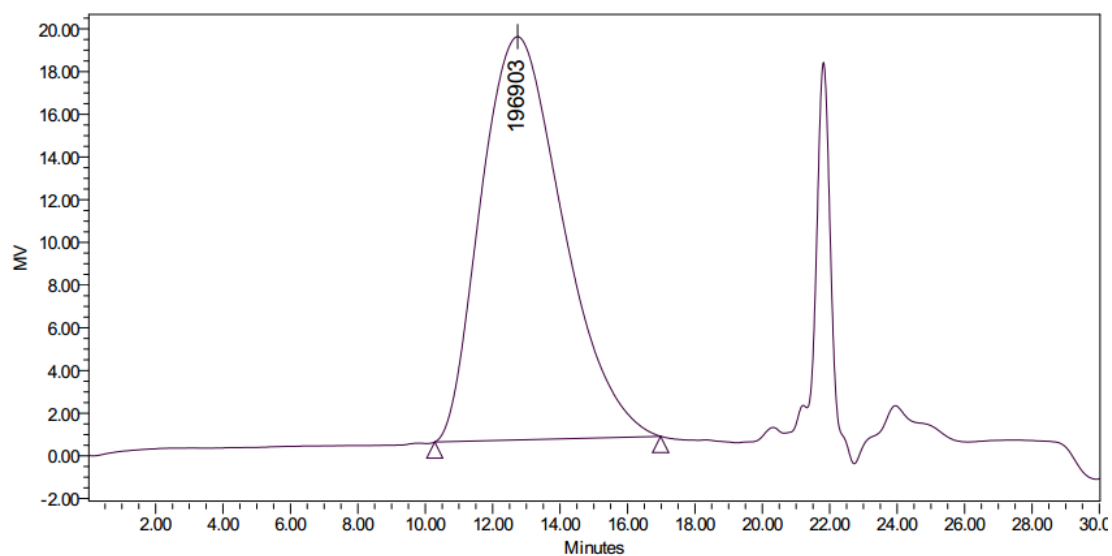

**Broad Unknown Modified Universal Peak Table**

|   | Distribution Name | Mv (Daltons) | K (dl/g) | alpha | Intrinsic Viscosity (dl/g) | Mn (Daltons) | Mw (Daltons) | MP (Daltons) | Mz (Daltons) | Mz+1 (Daltons) | Polydispersity | Mz/Mw    |
|---|-------------------|--------------|----------|-------|----------------------------|--------------|--------------|--------------|--------------|----------------|----------------|----------|
| 1 |                   |              |          |       |                            | 67748        | 282710       | 196903       | 687657       | 1139210        | 4.172967       | 2.432373 |

**Figure S59.** GPC curve of poly(EPI) in Table 1, entry 12.

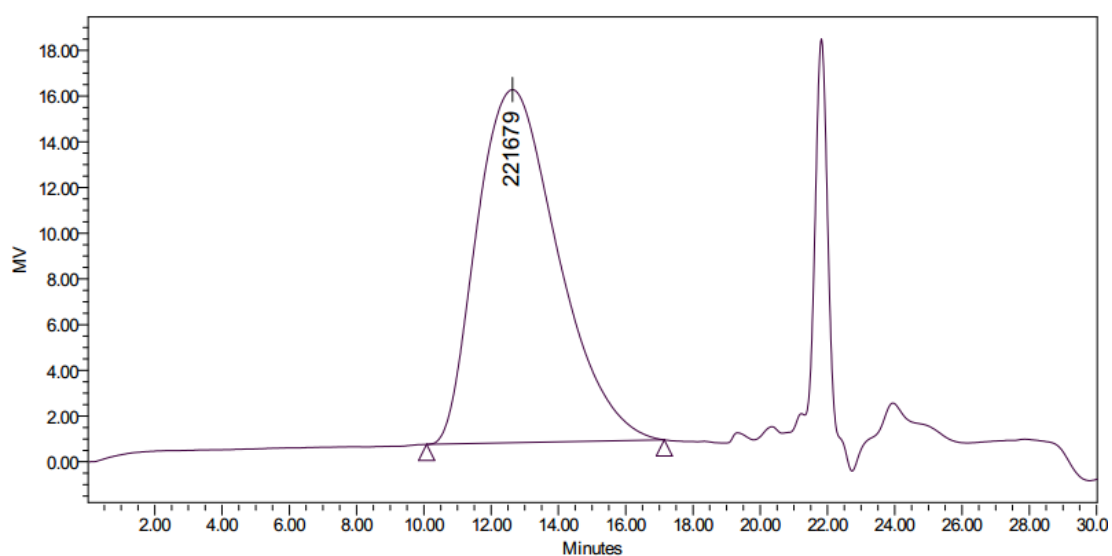

**Broad Unknown Modified Universal Peak Table**

|   | Distribution Name | Mv (Daltons) | K (dl/g) | alpha | Intrinsic Viscosity (dl/g) | Mn (Daltons) | Mw (Daltons) | MP (Daltons) | Mz (Daltons) | Mz+1 (Daltons) | Polydispersity | Mz/Mw    |
|---|-------------------|--------------|----------|-------|----------------------------|--------------|--------------|--------------|--------------|----------------|----------------|----------|
| 1 |                   |              |          |       |                            | 71713        | 302167       | 221679       | 712672       | 1167319        | 4.213543       | 2.358538 |

**Figure 60.** GPC curve of poly(EPI) in Table 1, entry 13.

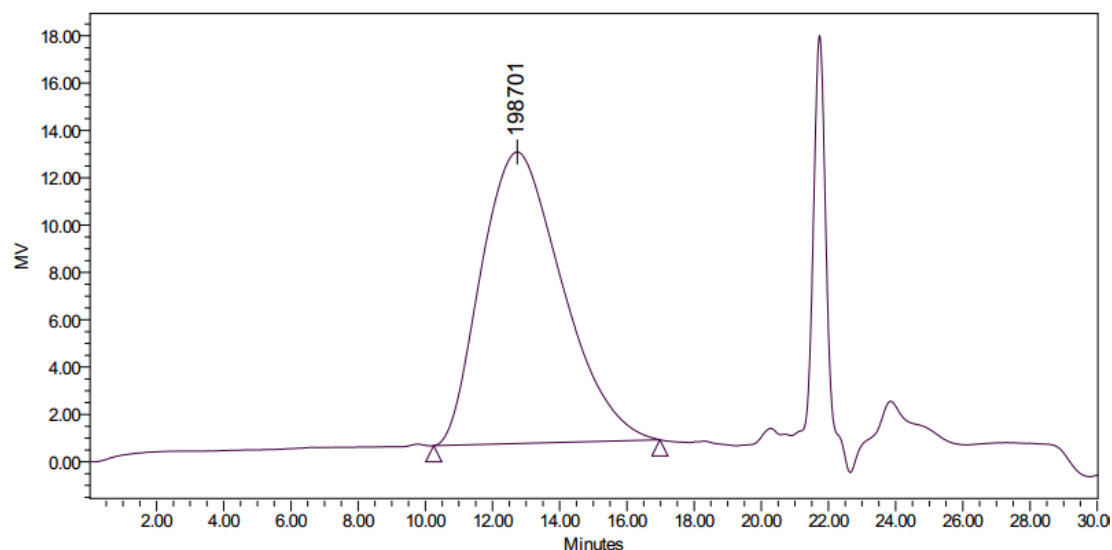

**Broad Unknown Modified Universal Peak Table**

|   | Distribution Name | Mv (Daltons) | K (dl/g) | alpha | Intrinsic Viscosity (dl/g) | Mn (Daltons) | Mw (Daltons) | MP (Daltons) | Mz (Daltons) | Mz+1 (Daltons) | Polydispersity | Mz/Mw    |
|---|-------------------|--------------|----------|-------|----------------------------|--------------|--------------|--------------|--------------|----------------|----------------|----------|
| 1 |                   |              |          |       |                            | 68089        | 279930       | 198701       | 677565       | 1123920        | 4.111215       | 2.420478 |

**Figure S61.** GPC curve of poly(EPI) in Table 1, entry 14.

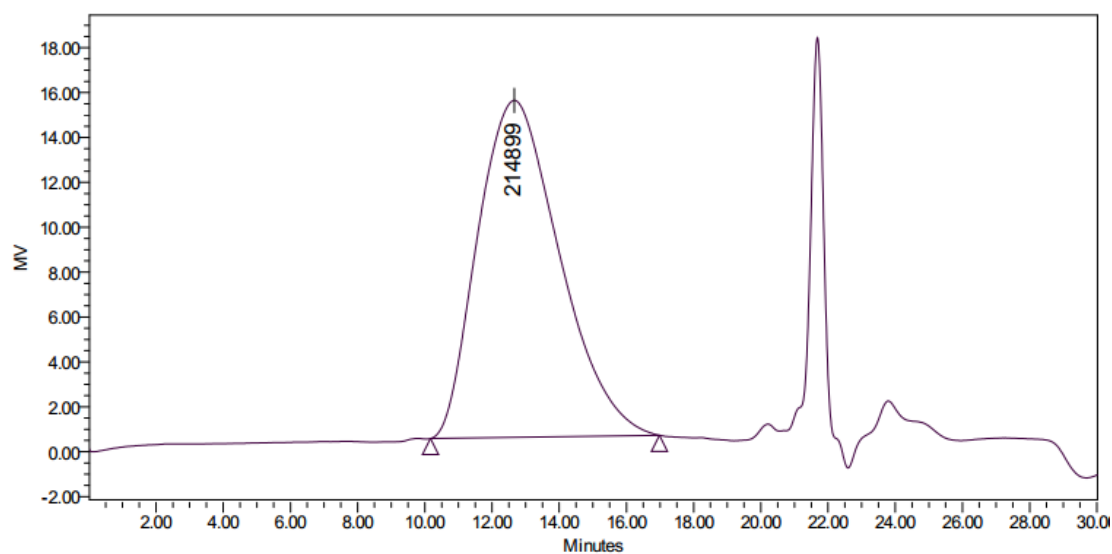

**Broad Unknown Modified Universal Peak Table**

|   | Distribution Name | Mv (Daltons) | K (dl/g) | alpha | Intrinsic Viscosity (dl/g) | Mn (Daltons) | Mw (Daltons) | MP (Daltons) | Mz (Daltons) | Mz+1 (Daltons) | Polydispersity | Mz/Mw    |
|---|-------------------|--------------|----------|-------|----------------------------|--------------|--------------|--------------|--------------|----------------|----------------|----------|
| 1 |                   |              |          |       |                            | 73048        | 309722       | 214899       | 762290       | 1271888        | 4.239970       | 2.461209 |

**Figure S62.** GPC curve of poly(EPI) in Table 1, entry 15.

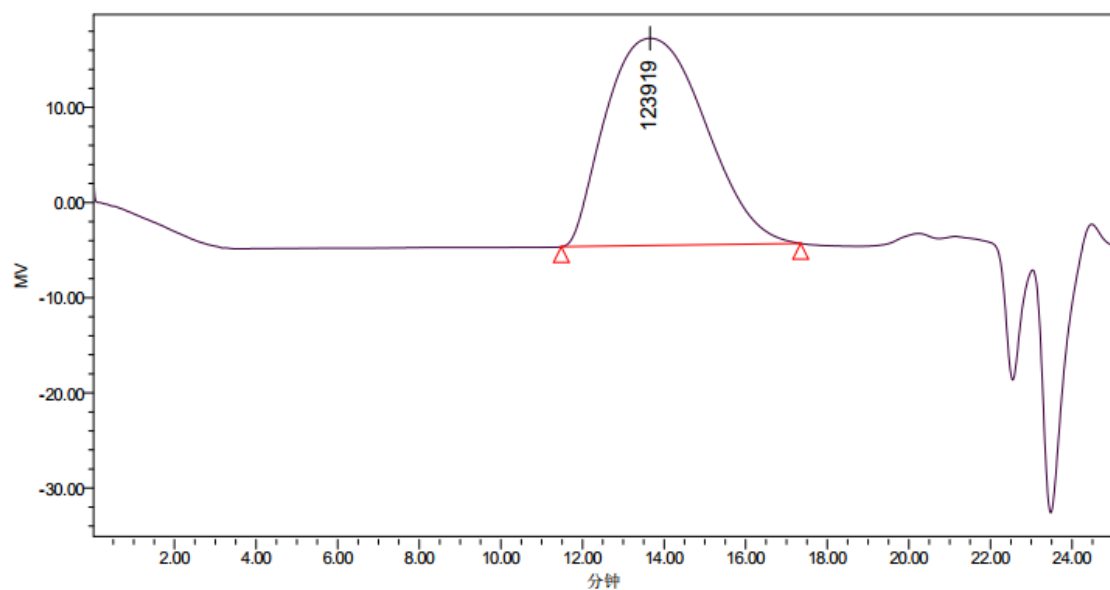

**GPC Results**

|   | Dist Name | Elution Volume (ml) | Retention Time (min) | Adjusted RT (min) | Mn    | Mw     | MP     | Mz     | Mz+1    | Mz/Mw    |
|---|-----------|---------------------|----------------------|-------------------|-------|--------|--------|--------|---------|----------|
| 1 |           | 13.657              | 13.657               | 13.657            | 64568 | 206115 | 123919 | 590028 | 1073073 | 2.862620 |

**Figure S63.** GPC curve of poly(IPI) in Table 1, entry 17.

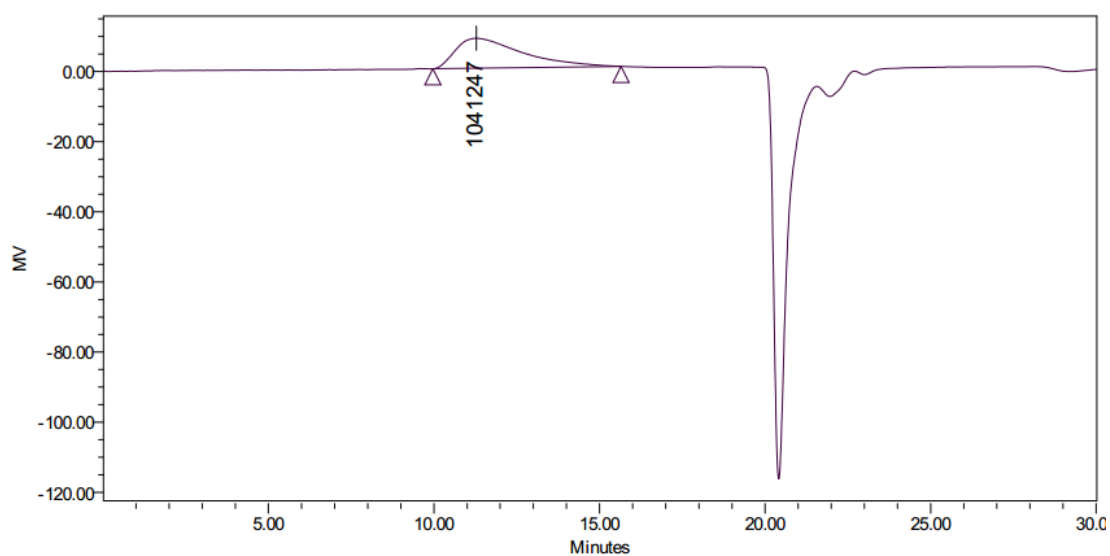

**Broad Unknown Modified Universal Peak Table**

|   | Distribution Name | Mv (Daltons) | K (dl/g) | alpha | Intrinsic Viscosity (dl/g) | Mn (Daltons) | Mw (Daltons) | MP (Daltons) | Mz (Daltons) | Mz+1 (Daltons) | Polydispersity | Mz/Mw    |
|---|-------------------|--------------|----------|-------|----------------------------|--------------|--------------|--------------|--------------|----------------|----------------|----------|
| 1 |                   |              |          |       |                            | 215458       | 840579       | 1041247      | 1580041      | 2162687        | 3.901350       | 1.879707 |

**Figure S64.** GPC curve of poly(D-IMIC) in Table 1, entry 18.



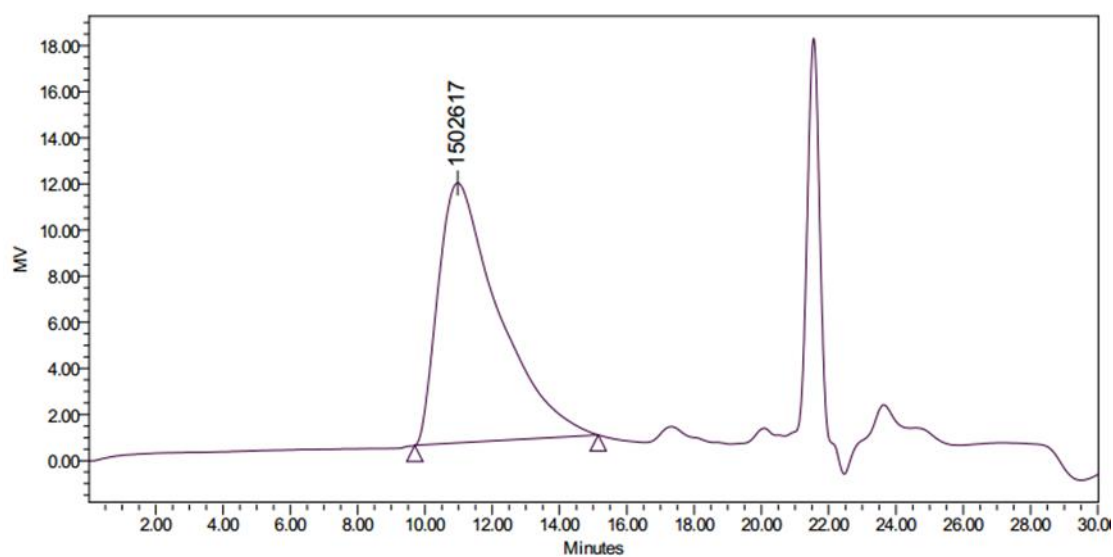

**Broad Unknown Modified Universal Peak Table**

|   | Distribution Name | Mv (Daltons) | K (dl/g) | alpha | Intrinsic Viscosity (dl/g) | Mn (Daltons) | Mw (Daltons) | MP (Daltons) | Mz (Daltons) | Mz+1 (Daltons) | Polydispersity | Mz/Mw    |
|---|-------------------|--------------|----------|-------|----------------------------|--------------|--------------|--------------|--------------|----------------|----------------|----------|
| 1 |                   |              |          |       |                            | 357051       | 1234953      | 1502617      | 2226555      | 3021716        | 3.458757       | 1.802947 |

**Figure S65.** GPC curve of poly(D-IMIC) in Table 1, entry 19.

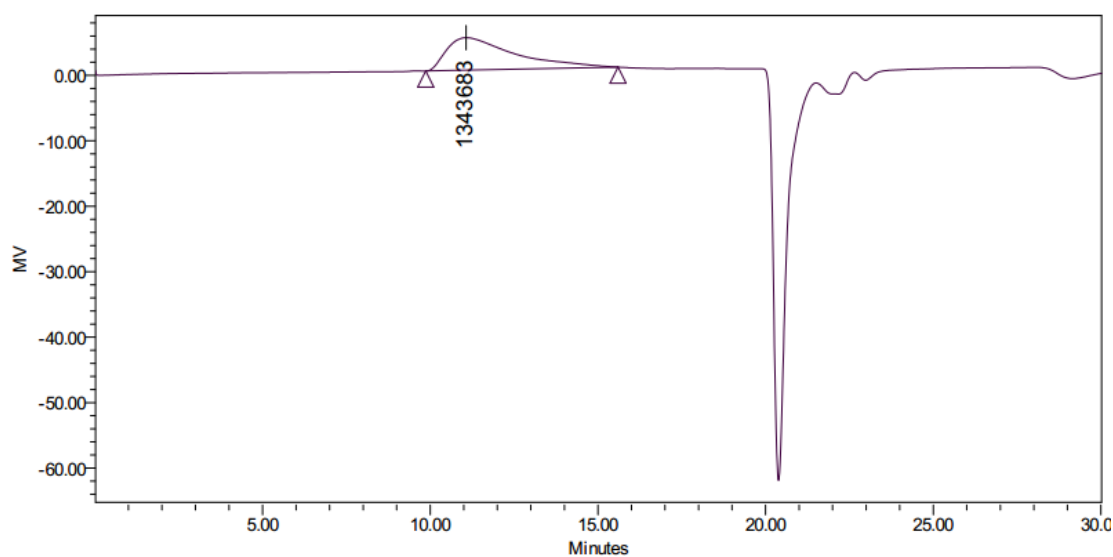

**Broad Unknown Modified Universal Peak Table**

|   | Distribution Name | Mv (Daltons) | K (dl/g) | alpha | Intrinsic Viscosity (dl/g) | Mn (Daltons) | Mw (Daltons) | MP (Daltons) | Mz (Daltons) | Mz+1 (Daltons) | Polydispersity | Mz/Mw    |
|---|-------------------|--------------|----------|-------|----------------------------|--------------|--------------|--------------|--------------|----------------|----------------|----------|
| 1 |                   |              |          |       |                            | 216071       | 995795       | 1343683      | 1887136      | 2530938        | 4.608639       | 1.895106 |

**Figure S66.** GPC curve of poly(L-IMIC) in Table 1, entry 20.

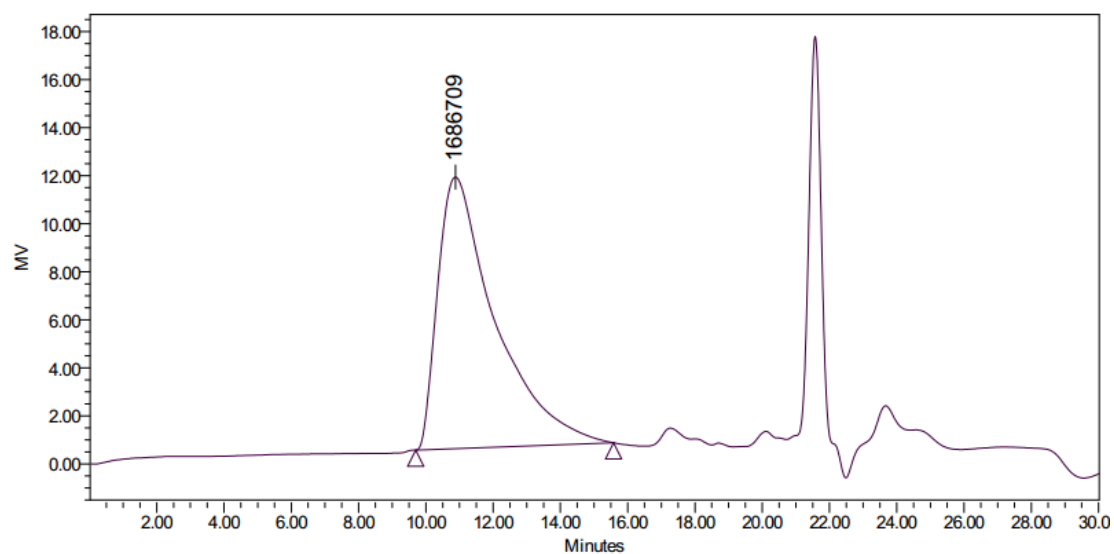

**Broad Unknown Modified Universal Peak Table**

|   | Distribution Name | Mv (Daltons) | K (dl/g) | alpha | Intrinsic Viscosity (dl/g) | Mn (Daltons) | Mw (Daltons) | MP (Daltons) | Mz (Daltons) | Mz+1 (Daltons) | Polydispersity | Mz/Mw    |
|---|-------------------|--------------|----------|-------|----------------------------|--------------|--------------|--------------|--------------|----------------|----------------|----------|
| 1 |                   |              |          |       |                            | 333832       | 1303972      | 1686709      | 2269851      | 2990174        | 3.906073       | 1.740721 |

**Figure S67.** GPC curve of poly(L-IMIC) in Table 1, entry 21.

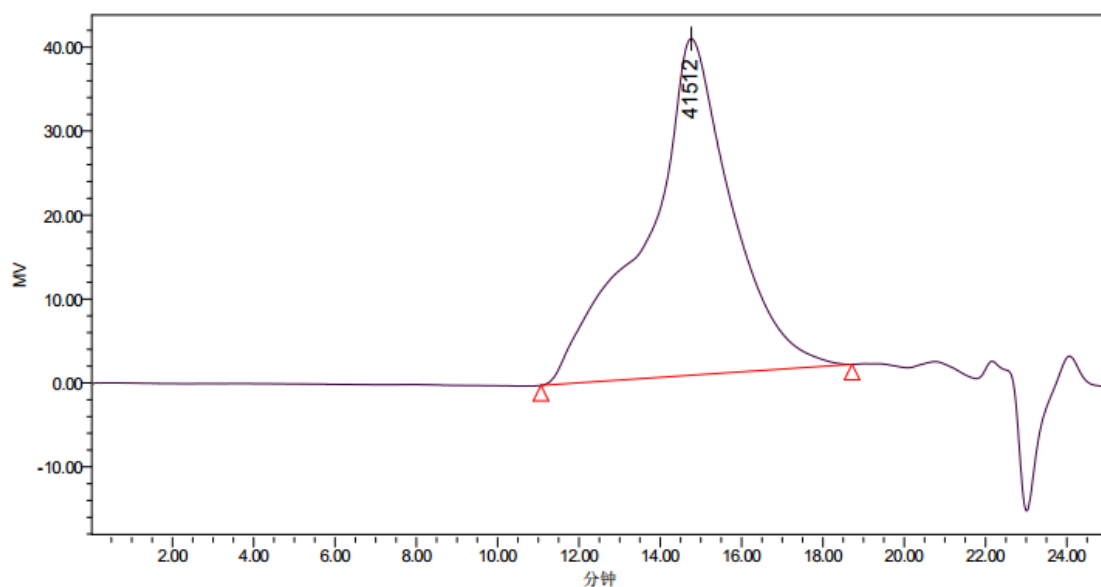

**GPC Results**

|   | Dist Name | Elution Volume (ml) | Retention Time (min) | Adjusted RT (min) | Mn    | Mw     | MP    | Mz      | Mz+1    | Mz/Mw    |
|---|-----------|---------------------|----------------------|-------------------|-------|--------|-------|---------|---------|----------|
| 1 |           | 14.764              | 14.764               | 14.764            | 33103 | 170406 | 41512 | 1232498 | 2684363 | 7.232707 |

**Figure S68.** GPC curve of poly(ITPB) in Table 1, entry 22.

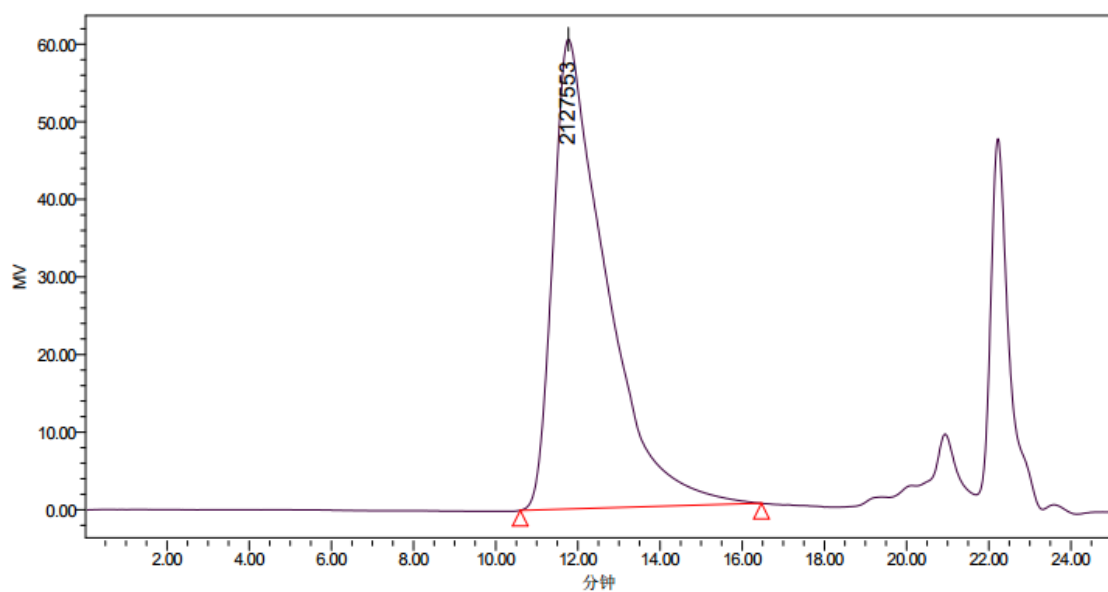

| GPC Results |           |                     |                      |                   |        |         |         |         |         |          |
|-------------|-----------|---------------------|----------------------|-------------------|--------|---------|---------|---------|---------|----------|
|             | Dist Name | Elution Volume (ml) | Retention Time (min) | Adjusted RT (min) | Mn     | Mw      | MP      | Mz      | Mz+1    | Mz/Mw    |
| 1           |           | 11.772              | 11.772               | 11.772            | 378543 | 1747850 | 2127553 | 3895455 | 6523868 | 2.228712 |

Figure S69. GPC curve of poly(ITPB) in Table 1, entry 23.

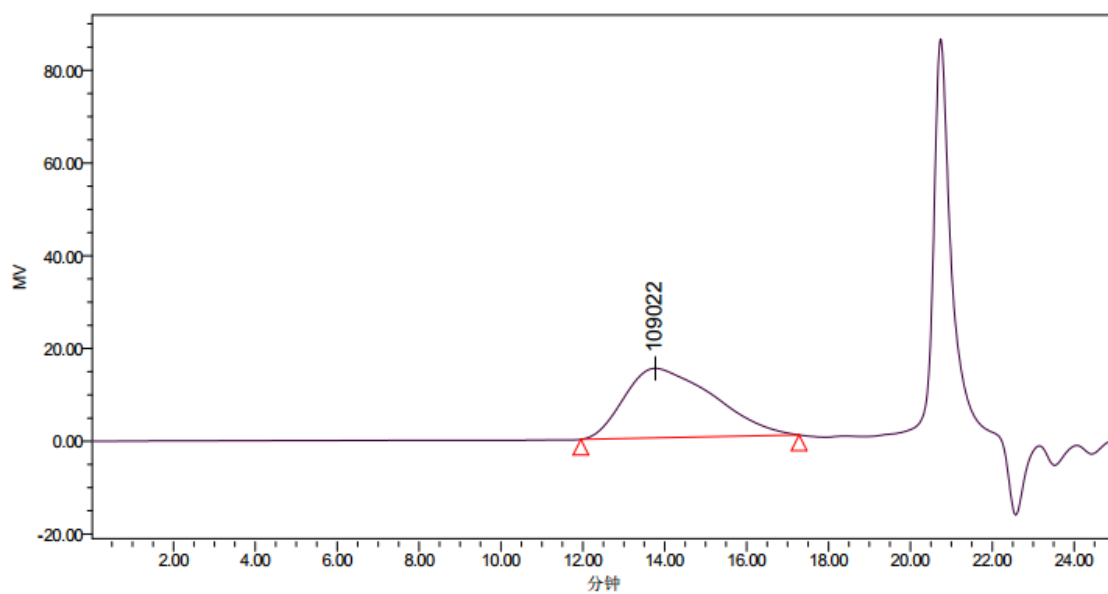

| GPC Results |           |                     |                      |                   |       |        |        |        |        |          |
|-------------|-----------|---------------------|----------------------|-------------------|-------|--------|--------|--------|--------|----------|
|             | Dist Name | Elution Volume (ml) | Retention Time (min) | Adjusted RT (min) | Mn    | Mw     | MP     | Mz     | Mz+1   | Mz/Mw    |
| 1           |           | 13.771              | 13.771               | 13.771            | 48615 | 115948 | 109022 | 259230 | 451684 | 2.235750 |

Figure S70. GPC curve of poly(BNB) in Table 1, entry 24.

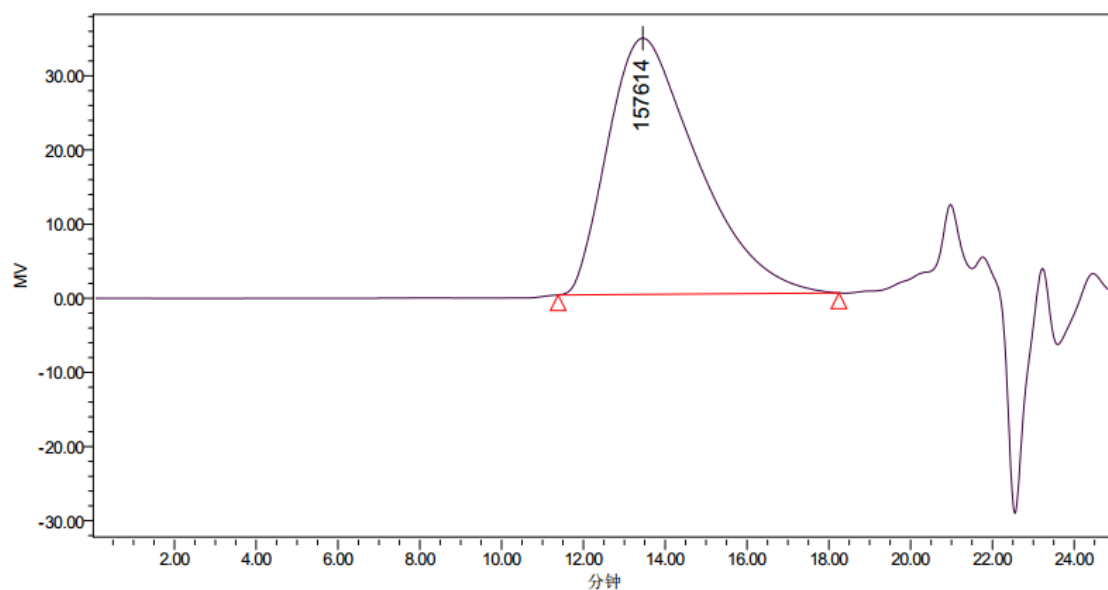

**GPC Results**

|   | Dist Name | Elution Volume (ml) | Retention Time (min) | Adjusted RT (min) | Mn    | Mw     | MP     | Mz     | Mz+1    | Mz/Mw    |
|---|-----------|---------------------|----------------------|-------------------|-------|--------|--------|--------|---------|----------|
| 1 |           | 13.453              | 13.453               | 13.453            | 60053 | 204824 | 157614 | 570245 | 1090598 | 2.784078 |

**Figure S71.** GPC curve of poly(PQPI) in Table 1, entry 25

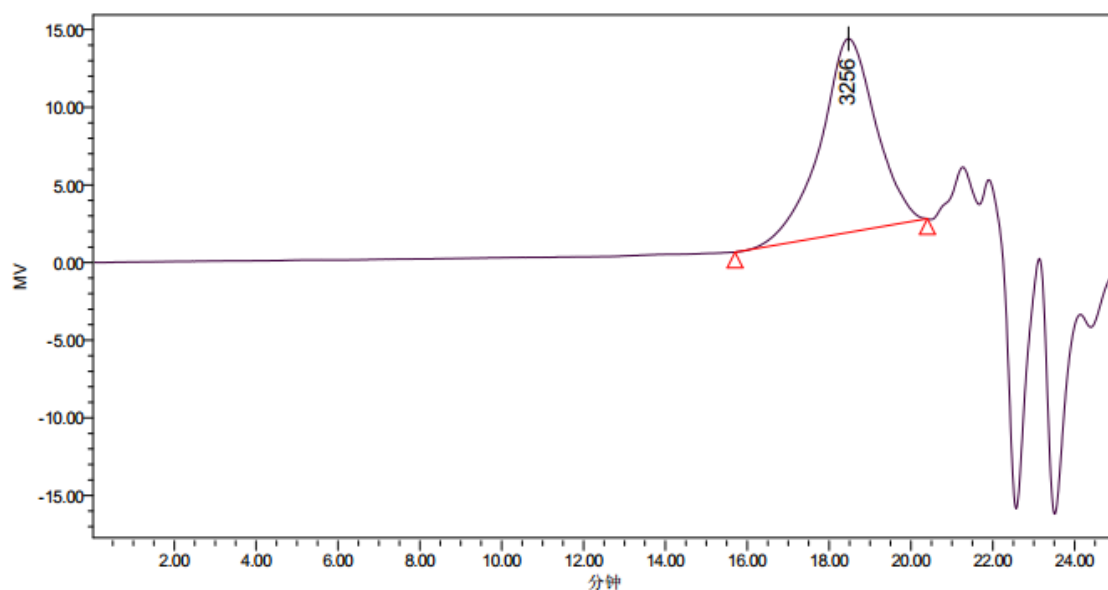

**GPC Results**

|   | Dist Name | Elution Volume (ml) | Retention Time (min) | Adjusted RT (min) | Mn   | Mw   | MP   | Mz   | Mz+1 | Mz/Mw    | Mz+1/Mw  |
|---|-----------|---------------------|----------------------|-------------------|------|------|------|------|------|----------|----------|
| 1 |           | 18.475              | 18.475               | 18.475            | 2819 | 3677 | 3256 | 4703 | 5891 | 1.279185 | 1.602208 |

**Figure S72.** GPC curve of poly(IPQ) in Table 1, entry 26.

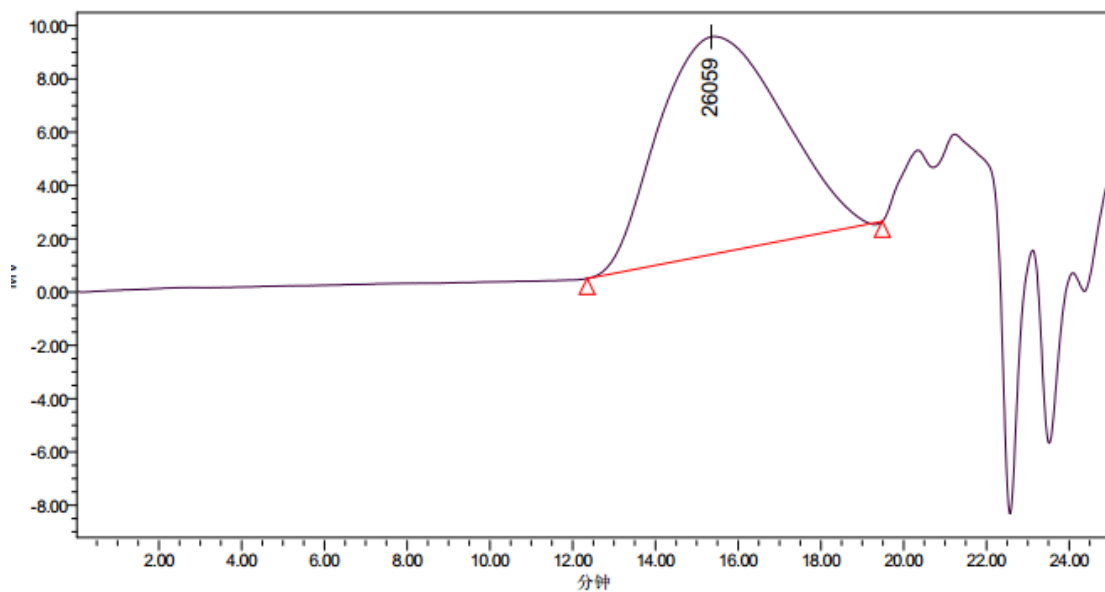

| GPC Results |           |                     |                      |                   |       |       |       |       |        |          |
|-------------|-----------|---------------------|----------------------|-------------------|-------|-------|-------|-------|--------|----------|
|             | Dist Name | Elution Volume (ml) | Retention Time (min) | Adjusted RT (min) | Mn    | Mw    | MP    | Mz    | Mz+1   | Mz/Mw    |
| 1           |           | 15.350              | 15.350               | 15.350            | 14977 | 36151 | 26059 | 86868 | 165736 | 2.402945 |

Figure S73. GPC curve of poly(IPD) in Table 1, entry 28.

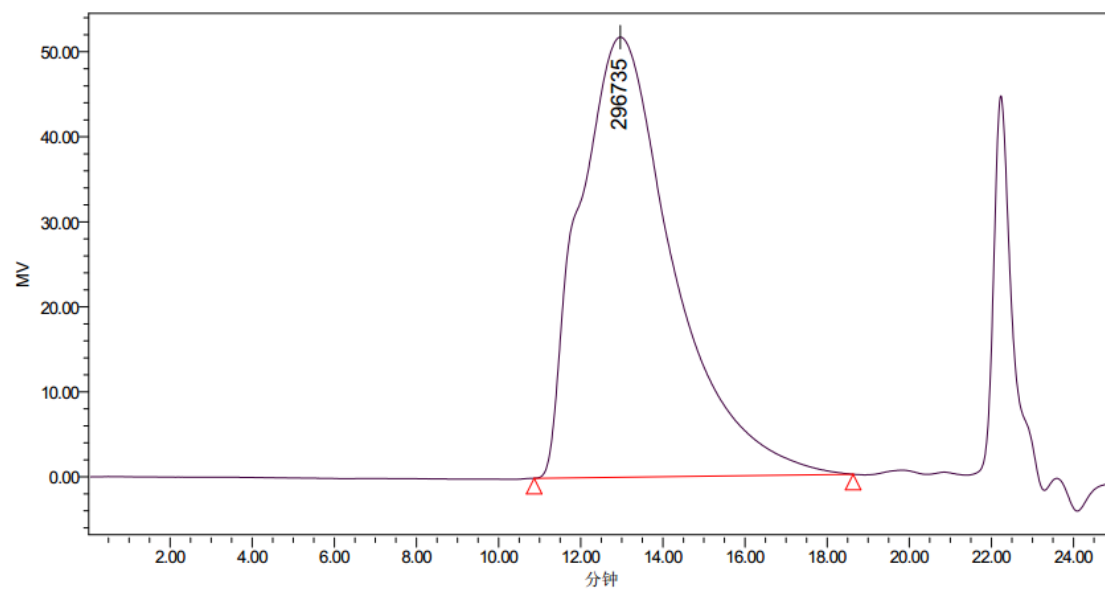

| GPC Results |           |                     |                      |                   |       |        |        |         |         |
|-------------|-----------|---------------------|----------------------|-------------------|-------|--------|--------|---------|---------|
|             | Dist Name | Elution Volume (ml) | Retention Time (min) | Adjusted RT (min) | Mn    | Mw     | MP     | Mz      | Mz+1    |
| 1           |           | 12.967              | 12.967               | 12.967            | 86648 | 569587 | 296735 | 1966614 | 3427610 |

Figure S74. GPC curve of poly(IPD) in Table 1, entry 29.

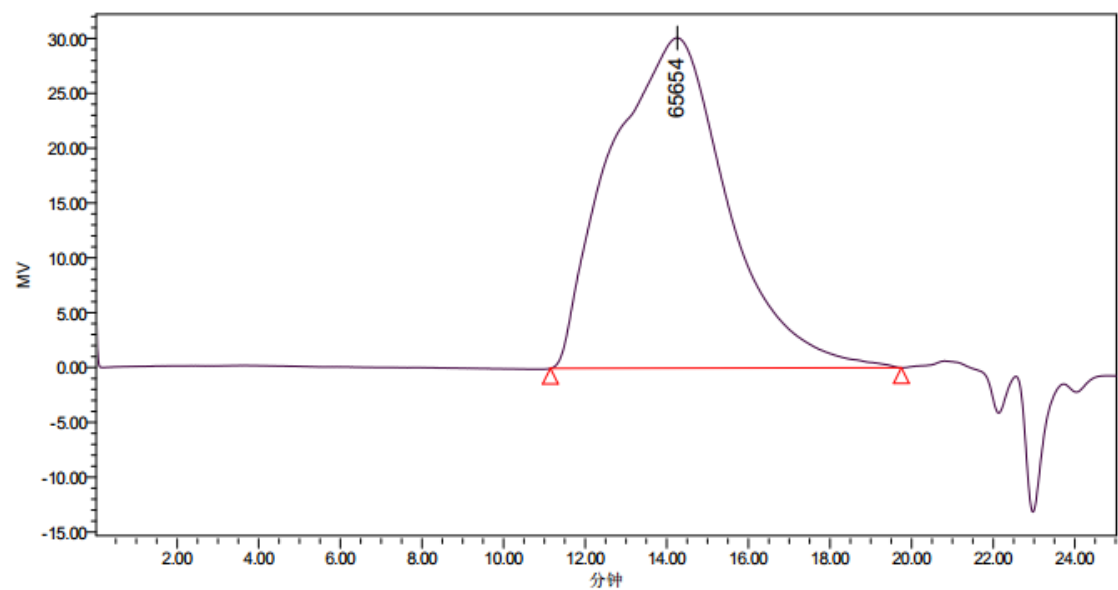

**GPC Results**

|   | Dist Name | Elution Volume (ml) | Retention Time (min) | Adjusted RT (min) | Mn    | Mw     | MP    | Mz      | Mz+1    | Mz/Mw    |
|---|-----------|---------------------|----------------------|-------------------|-------|--------|-------|---------|---------|----------|
| 1 |           | 14.259              | 14.259               | 14.259            | 38873 | 254887 | 65654 | 1174060 | 2268873 | 4.606198 |

**Figure S75.** GPC curve of poly(ITPB-co-D-IMCI) in Table 2, entry 1.

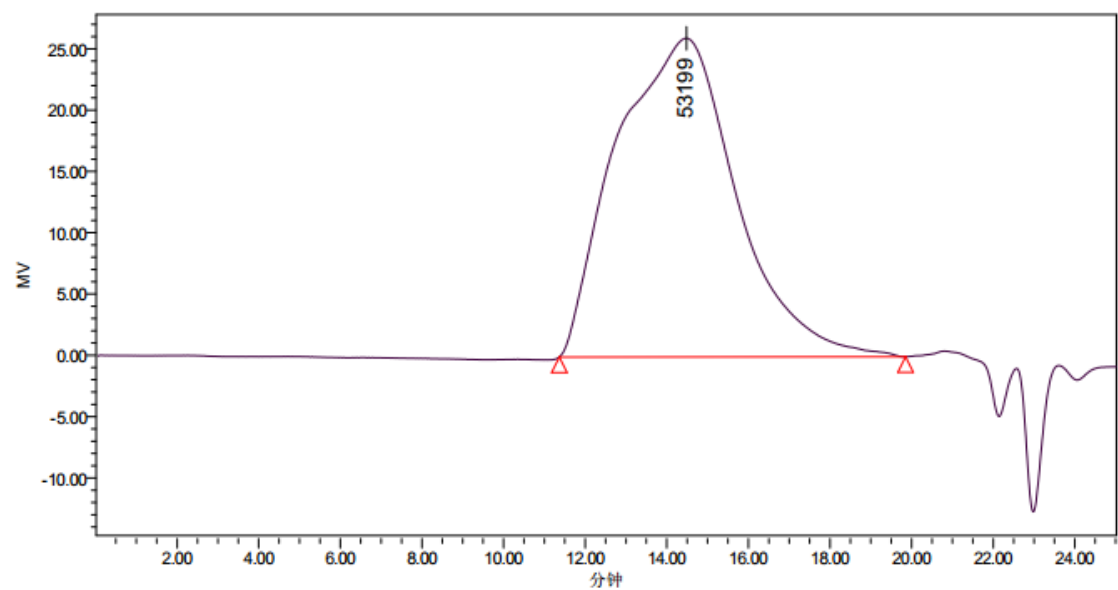

**GPC Results**

|   | Dist Name | Elution Volume (ml) | Retention Time (min) | Adjusted RT (min) | Mn    | Mw     | MP    | Mz     | Mz+1    | Mz/Mw    |
|---|-----------|---------------------|----------------------|-------------------|-------|--------|-------|--------|---------|----------|
| 1 |           | 14.482              | 14.482               | 14.482            | 34532 | 198280 | 53199 | 856640 | 1657729 | 4.320346 |

**Figure S76.** GPC curve of poly(ITPB-co-D-IMCI) in Table 2, entry 2.

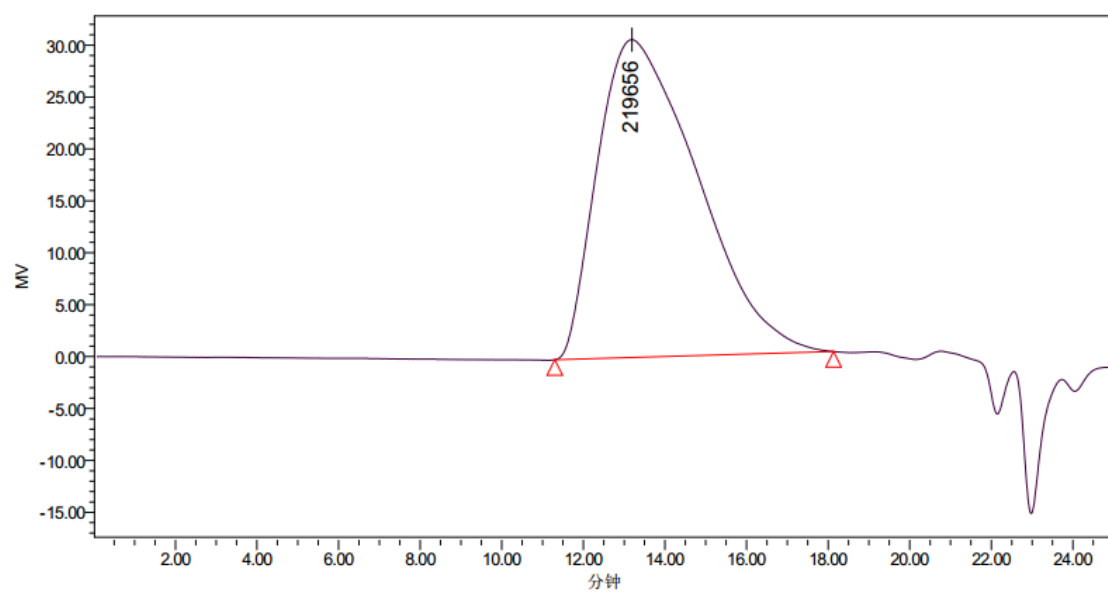

**GPC Results**

|   | Dist Name | Elution Volume (ml) | Retention Time (min) | Adjusted RT (min) | Mn    | Mw     | MP     | Mz     | Mz+1    | Mz/Mw    |
|---|-----------|---------------------|----------------------|-------------------|-------|--------|--------|--------|---------|----------|
| 1 |           | 13.190              | 13.190               | 13.190            | 63424 | 264803 | 219656 | 816461 | 1509701 | 3.083281 |

**Figure S77.** GPC curve of poly(ITPB-co-D-IMCI) in Table 2, entry 3.

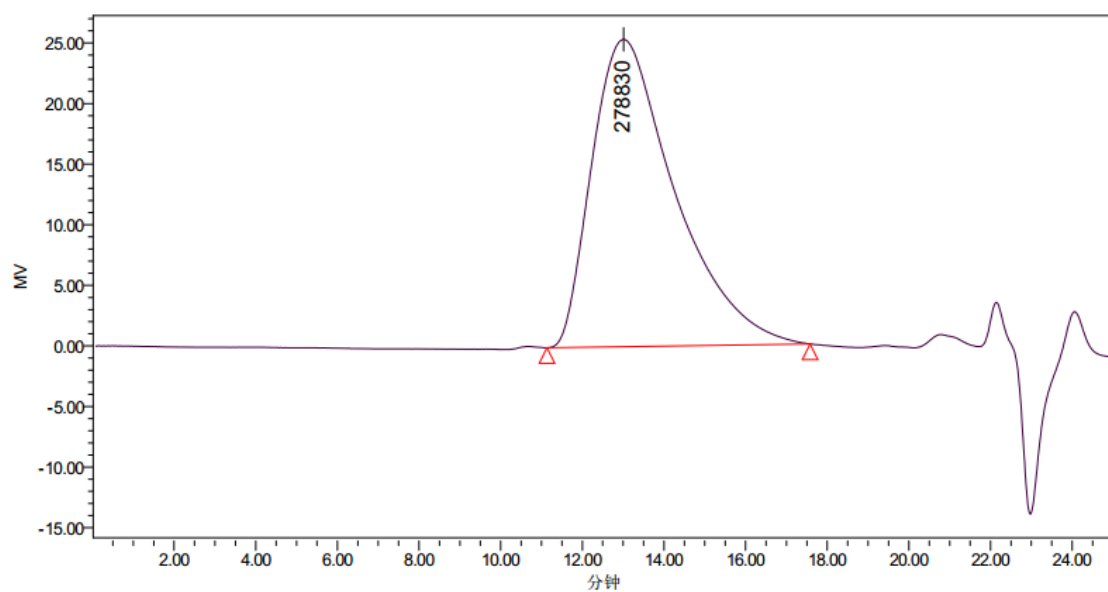

**GPC Results**

|   | Dist Name | Elution Volume (ml) | Retention Time (min) | Adjusted RT (min) | Mn    | Mw     | MP     | Mz     | Mz+1    | Mz/Mw    |
|---|-----------|---------------------|----------------------|-------------------|-------|--------|--------|--------|---------|----------|
| 1 |           | 13.012              | 13.012               | 13.012            | 90481 | 352248 | 278830 | 981575 | 1814187 | 2.786600 |

**Figure S78.** GPC curve of poly(ITPB-co-D-IMCI) in Table 2, entry 4.

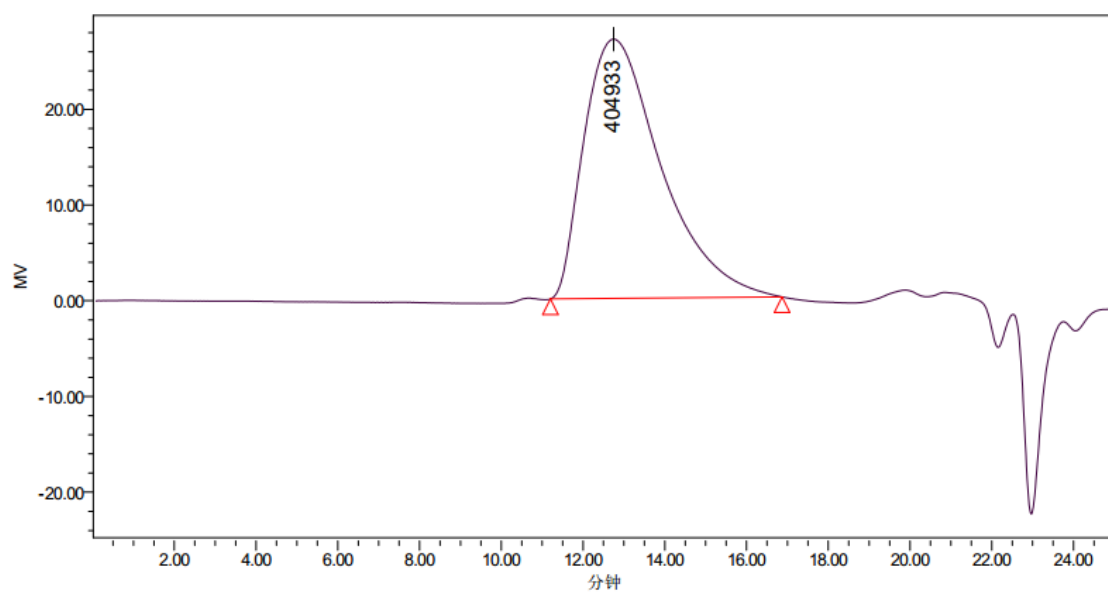

| GPC Results |           |                     |                      |                   |        |        |        |         |         |          |
|-------------|-----------|---------------------|----------------------|-------------------|--------|--------|--------|---------|---------|----------|
|             | Dist Name | Elution Volume (ml) | Retention Time (min) | Adjusted RT (min) | Mn     | Mw     | MP     | Mz      | Mz+1    | Mz/Mw    |
| 1           |           | 12.750              | 12.750               | 12.750            | 131898 | 492770 | 404933 | 1243941 | 2101771 | 2.524382 |

Figure S79. GPC curve of poly(ITPB-co-D-IMCl) in Table 2, entry 5.

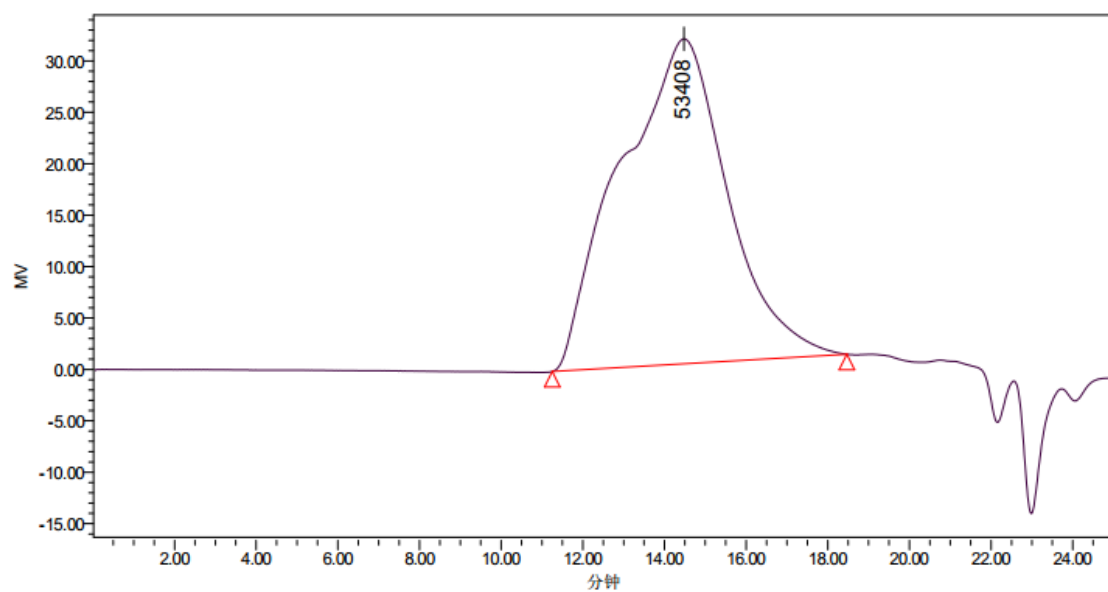

| GPC Results |           |                     |                      |                   |       |        |       |        |         |          |
|-------------|-----------|---------------------|----------------------|-------------------|-------|--------|-------|--------|---------|----------|
|             | Dist Name | Elution Volume (ml) | Retention Time (min) | Adjusted RT (min) | Mn    | Mw     | MP    | Mz     | Mz+1    | Mz/Mw    |
| 1           |           | 14.478              | 14.478               | 14.478            | 43523 | 213114 | 53408 | 956646 | 1875173 | 4.488899 |

Figure S80. GPC curve of poly(ITPB-co-L-IMCl) in Table 2, entry 6.



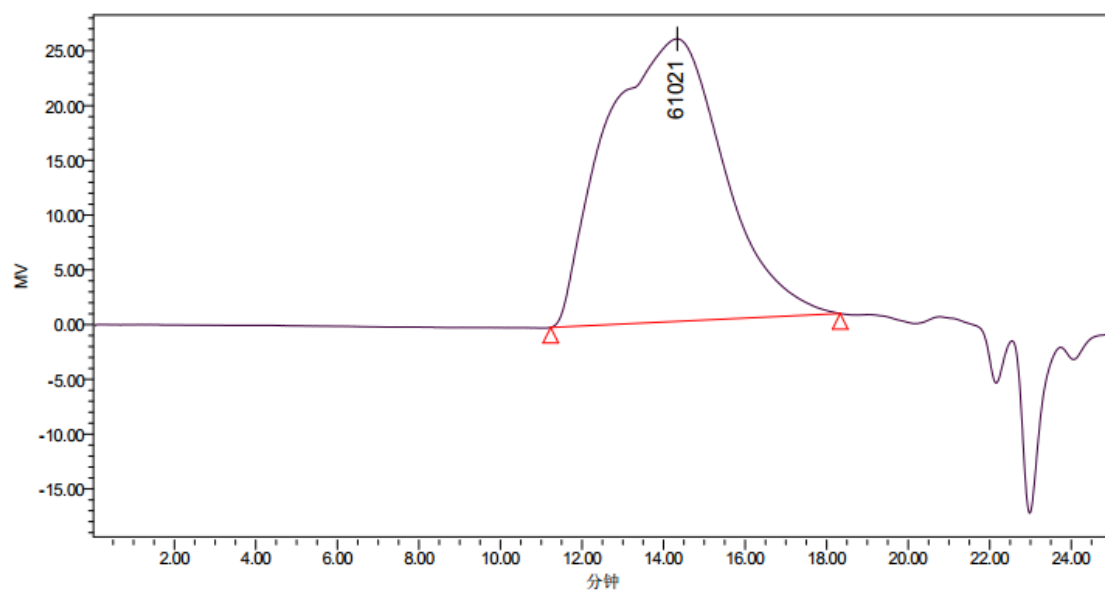

**GPC Results**

|   | Dist Name | Elution Volume (ml) | Retention Time (min) | Adjusted RT (min) | Mn    | Mw     | MP    | Mz      | Mz+1    | Mz/Mw    |
|---|-----------|---------------------|----------------------|-------------------|-------|--------|-------|---------|---------|----------|
| 1 |           | 14.335              | 14.335               | 14.335            | 47944 | 246380 | 61021 | 1008788 | 1903372 | 4.094441 |

**Figure S81.** GPC curve of poly(ITPB-co-L-IMCI) in Table 2, entry 7.

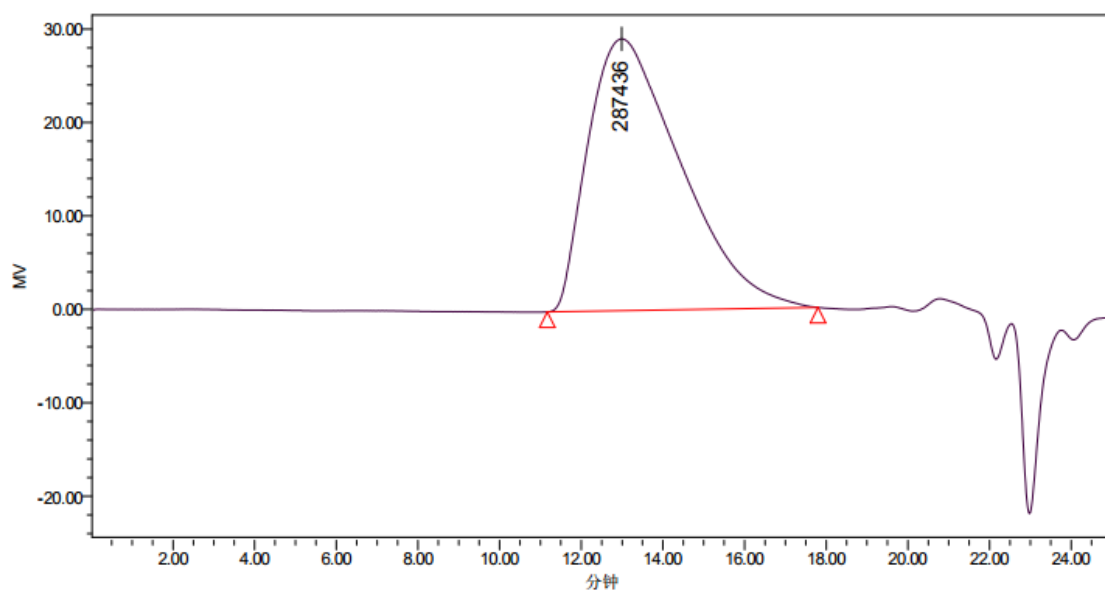

**GPC Results**

|   | Dist Name | Elution Volume (ml) | Retention Time (min) | Adjusted RT (min) | Mn    | Mw     | MP     | Mz      | Mz+1    | Mz/Mw    |
|---|-----------|---------------------|----------------------|-------------------|-------|--------|--------|---------|---------|----------|
| 1 |           | 12.990              | 12.990               | 12.990            | 81562 | 357021 | 287436 | 1046293 | 1861634 | 2.930621 |

**Figure S82.** GPC curve of poly(ITPB-co-L-IMCI) in Table 2, entry 8.

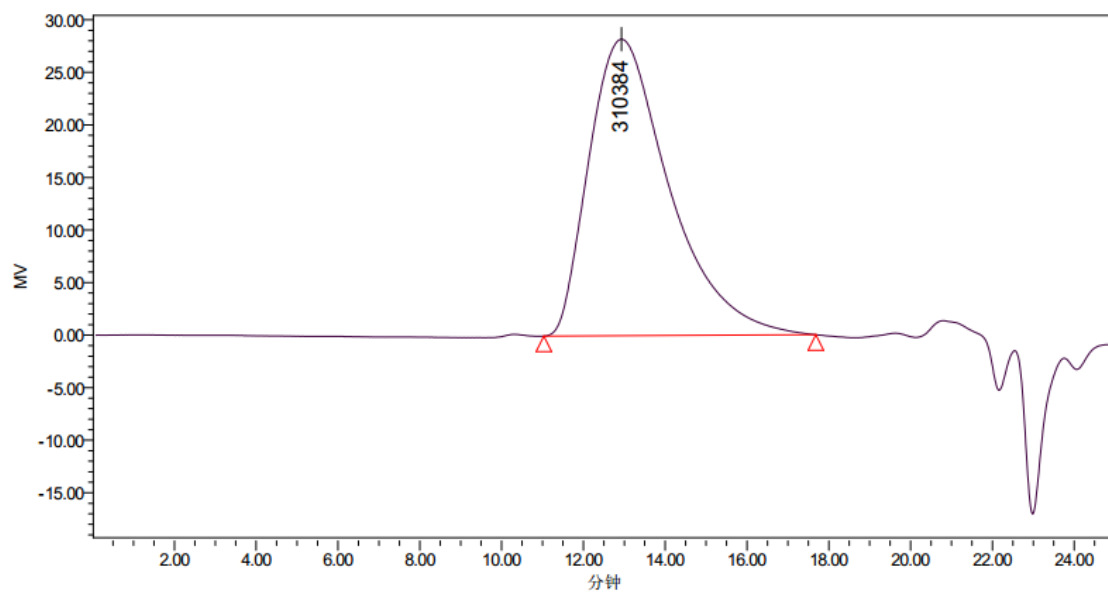

**GPC Results**

|   | Dist Name | Elution Volume (ml) | Retention Time (min) | Adjusted RT (min) | Mn     | Mw     | MP     | Mz      | Mz+1    | Mz/Mw    |
|---|-----------|---------------------|----------------------|-------------------|--------|--------|--------|---------|---------|----------|
| 1 |           | 12.935              | 12.935               | 12.935            | 106664 | 430123 | 310384 | 1240872 | 2374240 | 2.884924 |

**Figure S83.** GPC curve of poly(ITPB-co-L-IMCI) in Table 2, entry 9.

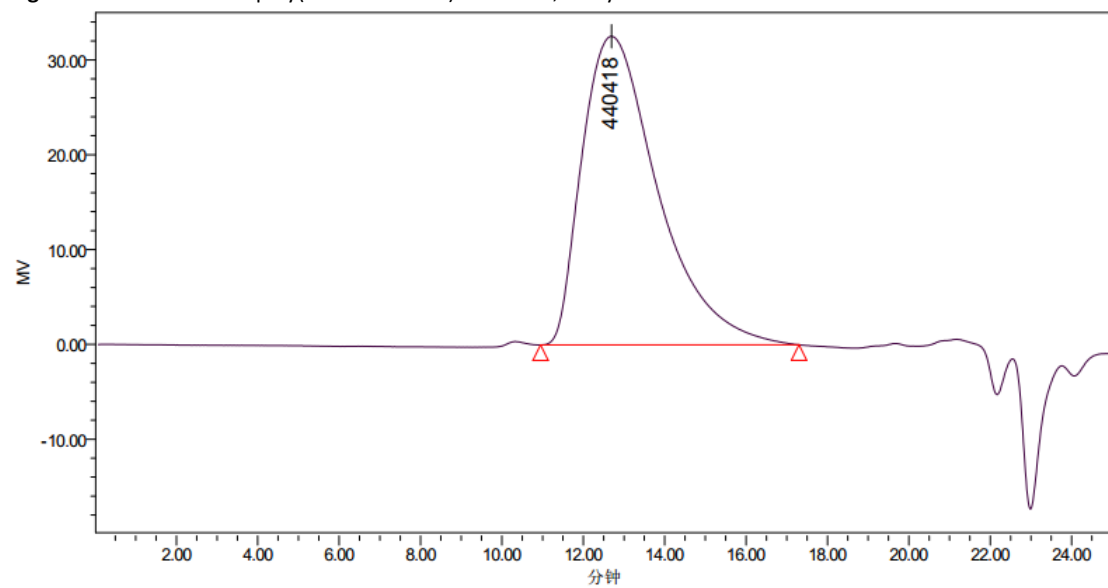

**GPC Results**

|   | Dist Name | Elution Volume (ml) | Retention Time (min) | Adjusted RT (min) | Mn     | Mw     | MP     | Mz      | Mz+1    | Mz/Mw    |
|---|-----------|---------------------|----------------------|-------------------|--------|--------|--------|---------|---------|----------|
| 1 |           | 12.694              | 12.694               | 12.694            | 136414 | 549035 | 440418 | 1444077 | 2577459 | 2.630208 |

**Figure S84.** GPC curve of poly(ITPB-co-L-IMCI) in Table 2, entry 10.

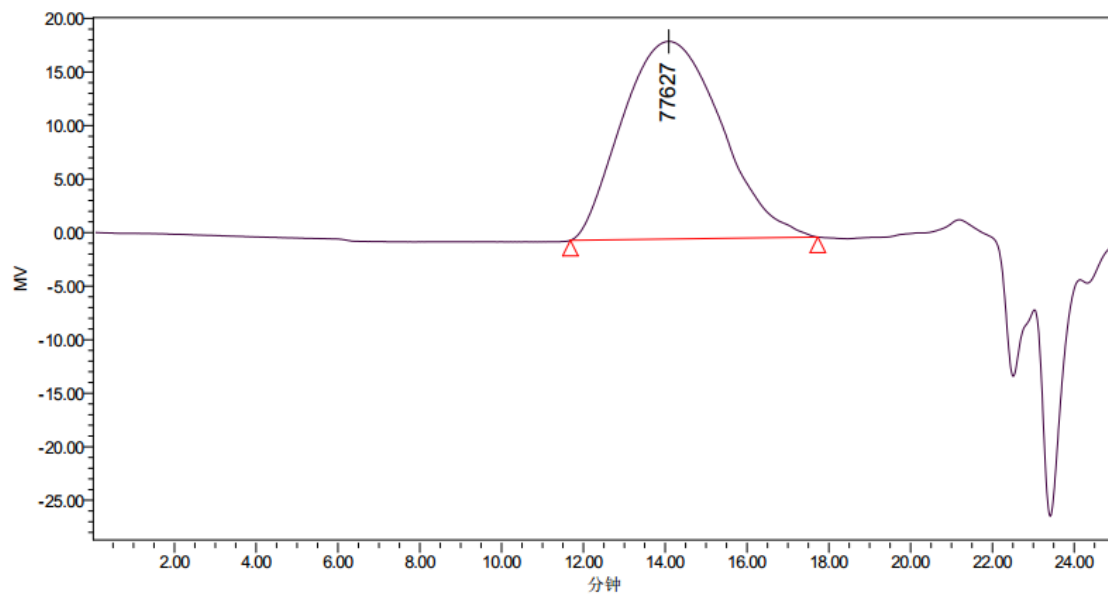

**GPC Results**

|   | Dist Name | Elution Volume (ml) | Retention Time (min) | Adjusted RT (min) | Mn    | Mw     | MP    | Mz     | Mz+1   | Mz/Mw    | Mz+1/Mw  |
|---|-----------|---------------------|----------------------|-------------------|-------|--------|-------|--------|--------|----------|----------|
| 1 |           | 14.090              | 14.090               | 14.090            | 47102 | 137594 | 77627 | 405628 | 788242 | 2.948007 | 5.728759 |

**Figure S85.** GPC curve of poly(IPI-co-D-IMCI) in Table 2, entry 11.

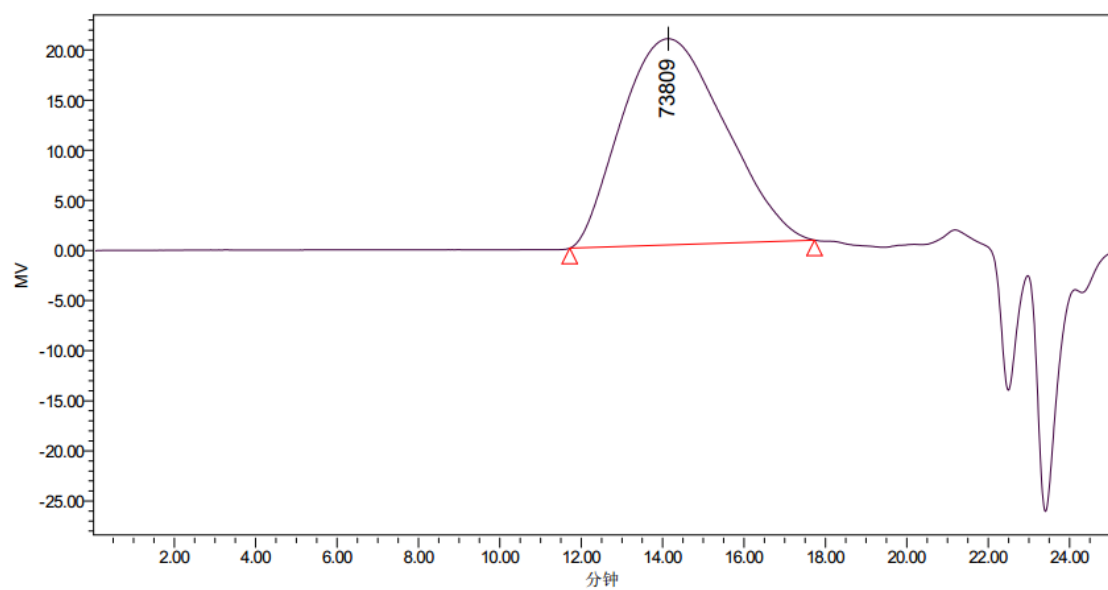

**GPC Results**

|   | Dist Name | Elution Volume (ml) | Retention Time (min) | Adjusted RT (min) | Mn    | Mw     | MP    | Mz     | Mz+1   | Mz/Mw    | Mz+1/Mw  |
|---|-----------|---------------------|----------------------|-------------------|-------|--------|-------|--------|--------|----------|----------|
| 1 |           | 14.140              | 14.140               | 14.140            | 41944 | 126181 | 73809 | 378663 | 736764 | 3.000954 | 5.838955 |

**Figure S86.** GPC curve of poly(IPI-co-D-IMCI) in Table 2, entry 12.

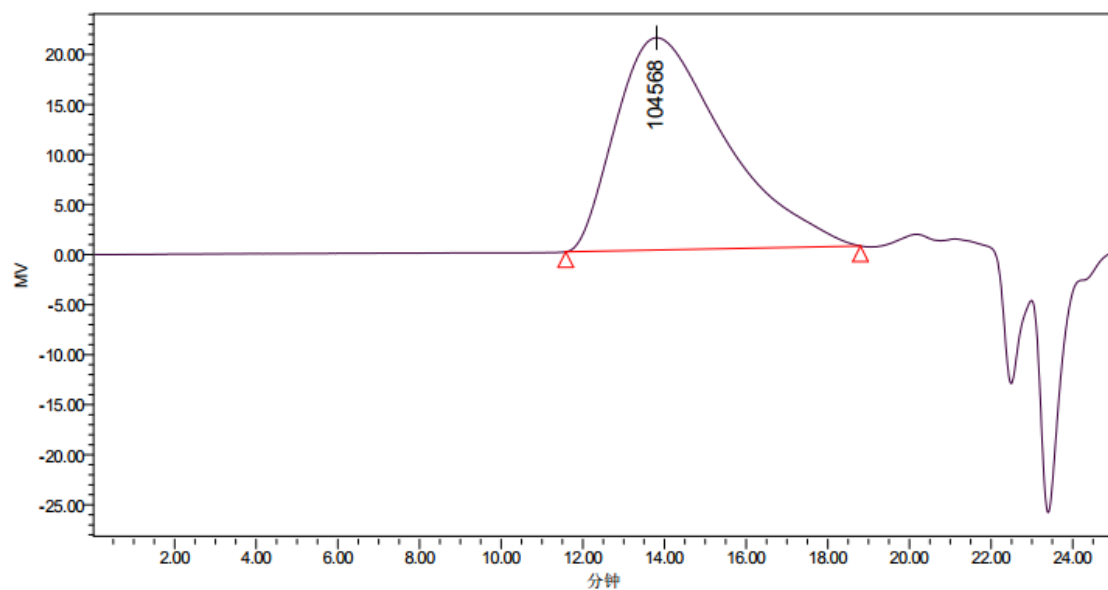

**GPC Results**

|   | Dist Name | Elution Volume (ml) | Retention Time (min) | Adjusted RT (min) | Mn    | Mw     | MP     | Mz     | Mz+1   | Mz/Mw    |
|---|-----------|---------------------|----------------------|-------------------|-------|--------|--------|--------|--------|----------|
| 1 |           | 13.808              | 13.808               | 13.808            | 34205 | 138858 | 104568 | 438372 | 855216 | 3.156985 |

**Figure S87.** GPC curve of poly(IPI-co-D-IMCI) in Table 2, entry 13.

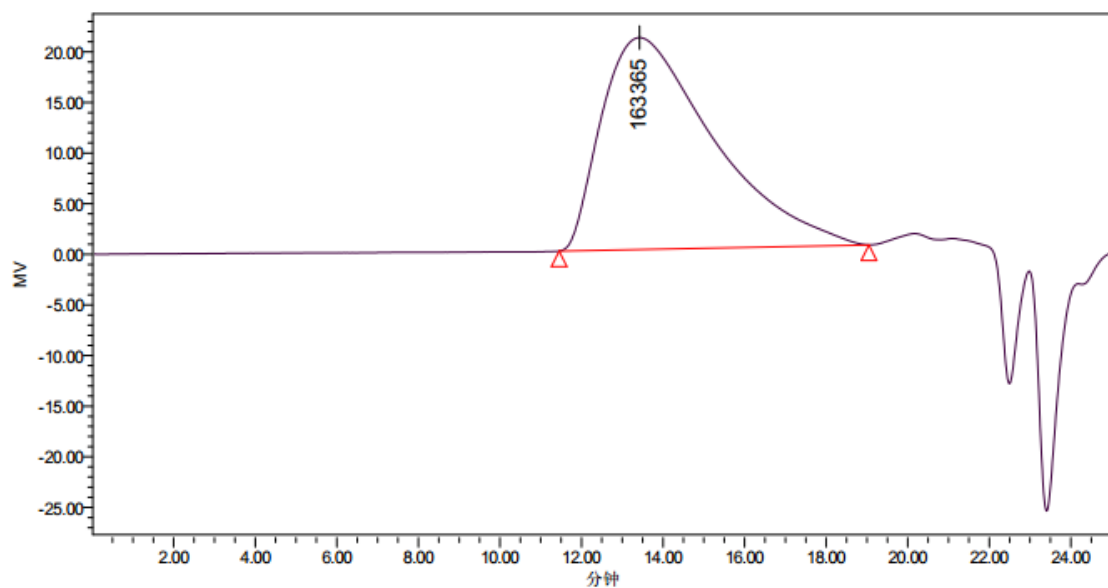

**GPC Results**

|   | Dist Name | Elution Volume (ml) | Retention Time (min) | Adjusted RT (min) | Mn    | Mw     | MP     | Mz     | Mz+1    | Mz/Mw    |
|---|-----------|---------------------|----------------------|-------------------|-------|--------|--------|--------|---------|----------|
| 1 |           | 13.424              | 13.424               | 13.424            | 37461 | 194506 | 163365 | 617050 | 1120837 | 3.172394 |

**Figure S88.** GPC curve of poly(IPI-co-D-IMCI) in Table 2, entry 14.

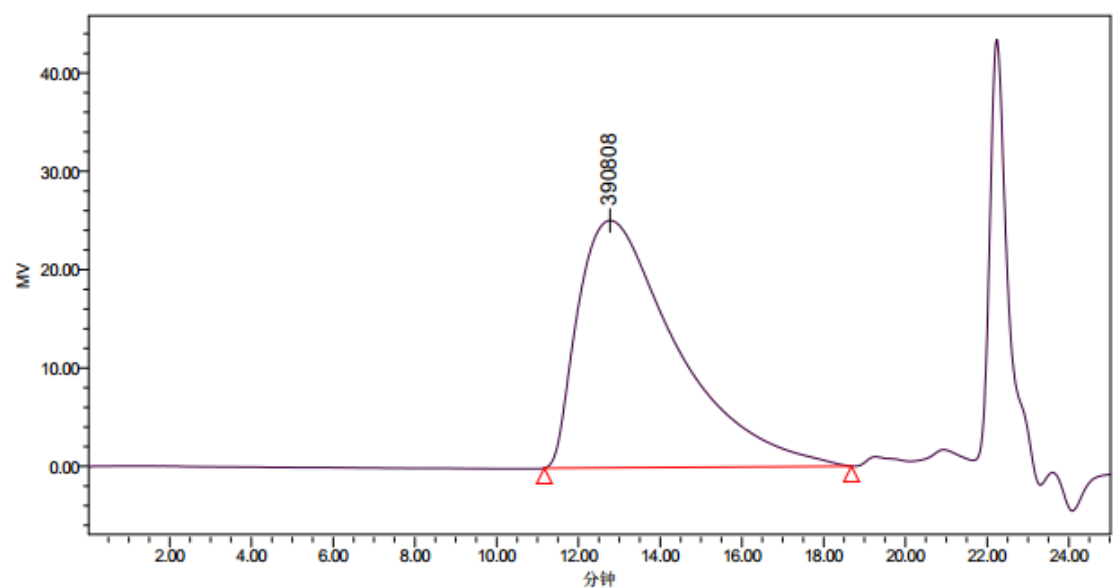

**GPC Results**

|   | Dist Name | Elution Volume (ml) | Retention Time (min) | Adjusted RT (min) | Mn    | Mw     | MP     | Mz      | Mz+1    | Mz/Mw    |
|---|-----------|---------------------|----------------------|-------------------|-------|--------|--------|---------|---------|----------|
| 1 |           | 12.774              | 12.774               | 12.774            | 63518 | 419917 | 390808 | 1272020 | 2166095 | 3.029216 |

**Figure S89.** GPC curve of poly(IPI-co-D-IMCI) in Table 2, entry 15.

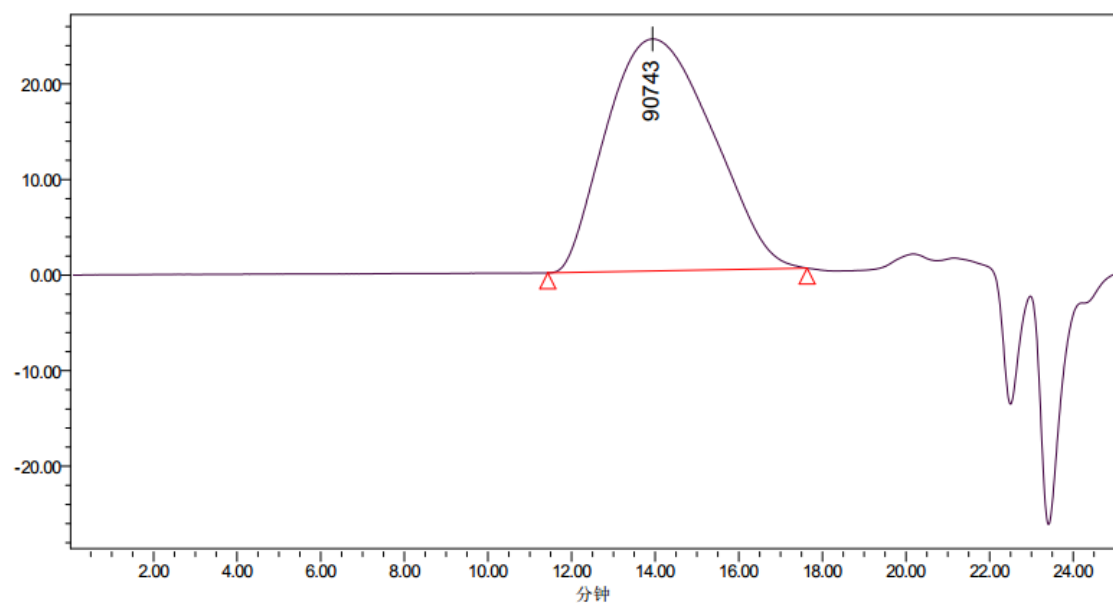

**GPC Results**

|   | Dist Name | Elution Volume (ml) | Retention Time (min) | Adjusted RT (min) | Mn    | Mw     | MP    | Mz     | Mz+1   | Mz/Mw    | Mz+1/Mw  |
|---|-----------|---------------------|----------------------|-------------------|-------|--------|-------|--------|--------|----------|----------|
| 1 |           | 13.940              | 13.940               | 13.940            | 48813 | 152319 | 90743 | 475709 | 953895 | 3.123104 | 6.262461 |

**Figure S90.** GPC curve of poly(IPI-co-L-IMCI) in Table 2, entry 16.

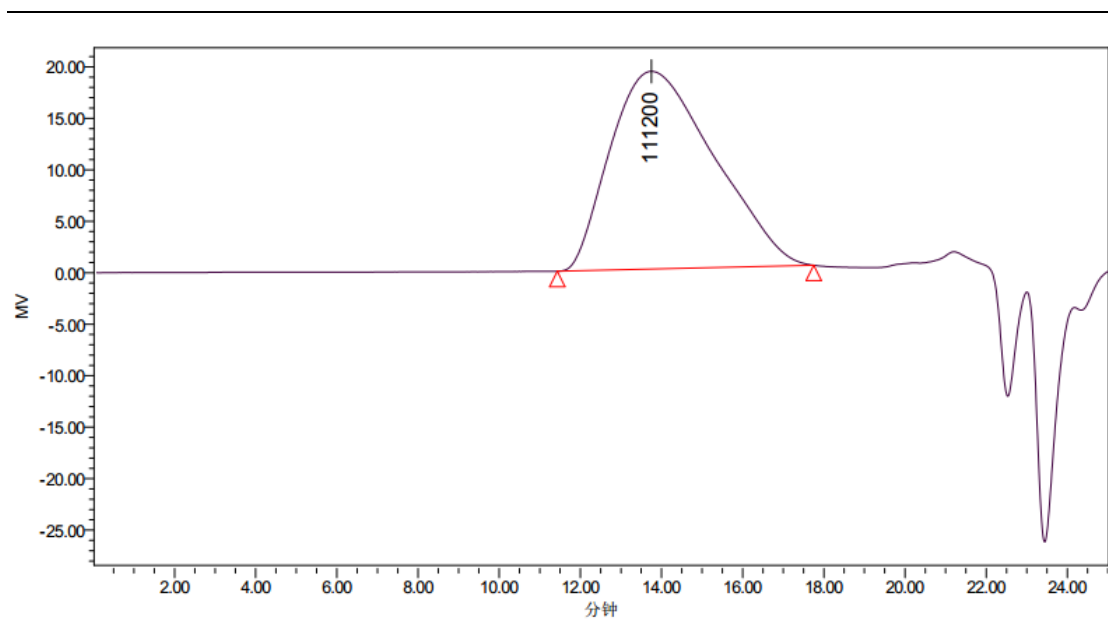

**GPC Results**

|   | Dist Name | Elution Volume (ml) | Retention Time (min) | Adjusted RT (min) | Mn    | Mw     | MP     | Mz     | Mz+1   | Mz/Mw    |
|---|-----------|---------------------|----------------------|-------------------|-------|--------|--------|--------|--------|----------|
| 1 |           | 13.753              | 13.753               | 13.753            | 47503 | 161857 | 111200 | 496148 | 964502 | 3.065349 |

**Figure S91.** GPC curve of poly(IPI-co-L-IMCl) in Table 2, entry 17.

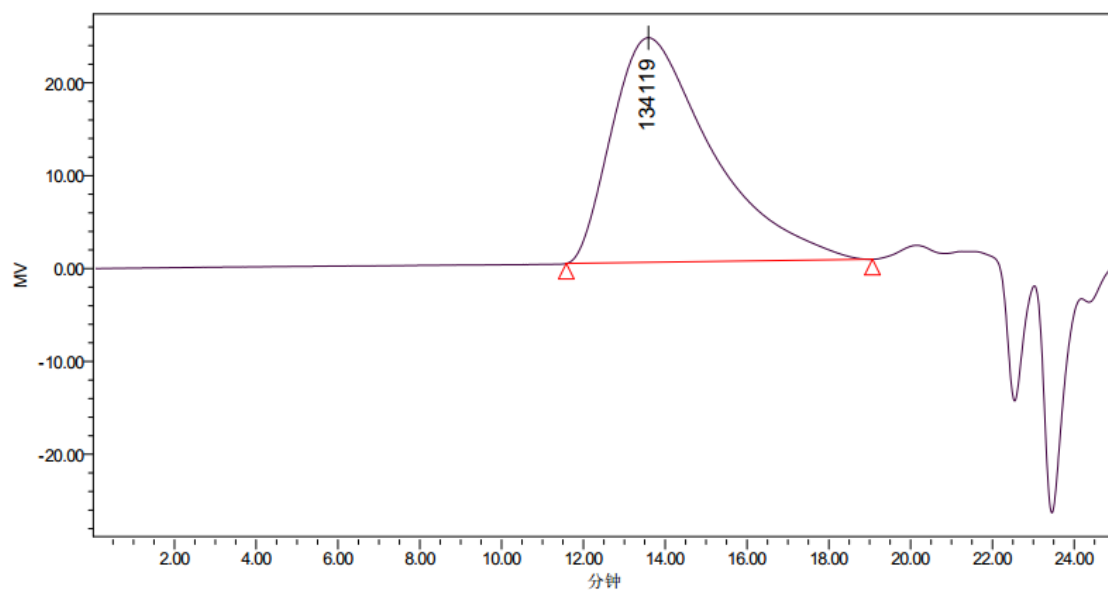

**GPC Results**

|   | Dist Name | Elution Volume (ml) | Retention Time (min) | Adjusted RT (min) | Mn    | Mw     | MP     | Mz     | Mz+1   | Mz/Mw    |
|---|-----------|---------------------|----------------------|-------------------|-------|--------|--------|--------|--------|----------|
| 1 |           | 13.589              | 13.589               | 13.589            | 39878 | 163384 | 134119 | 475900 | 890888 | 2.912778 |

**Figure S92.** GPC curve of poly(IPI-co-L-IMCl) in Table 2, entry 18.

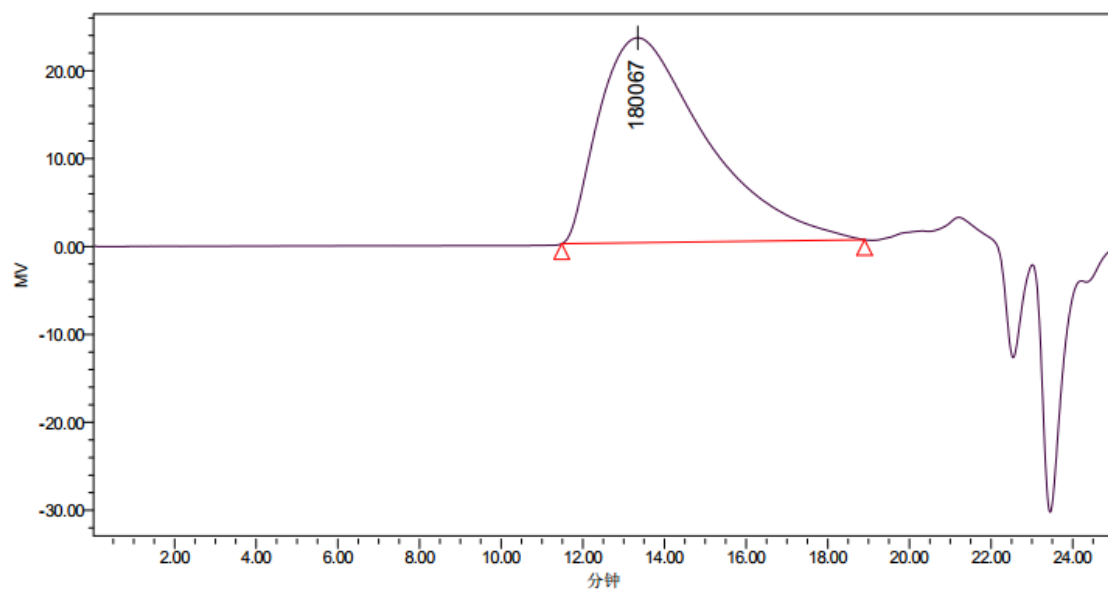

**GPC Results**

|   | Dist Name | Elution Volume (ml) | Retention Time (min) | Adjusted RT (min) | Mn    | Mw     | MP     | Mz     | Mz+1    | Mz/Mw    |
|---|-----------|---------------------|----------------------|-------------------|-------|--------|--------|--------|---------|----------|
| 1 |           | 13.345              | 13.345               | 13.345            | 43492 | 227524 | 180067 | 700422 | 1227425 | 3.078455 |

**Figure S93.** GPC curve of poly(IPI-co-L-IMCl) in Table 2, entry 19.

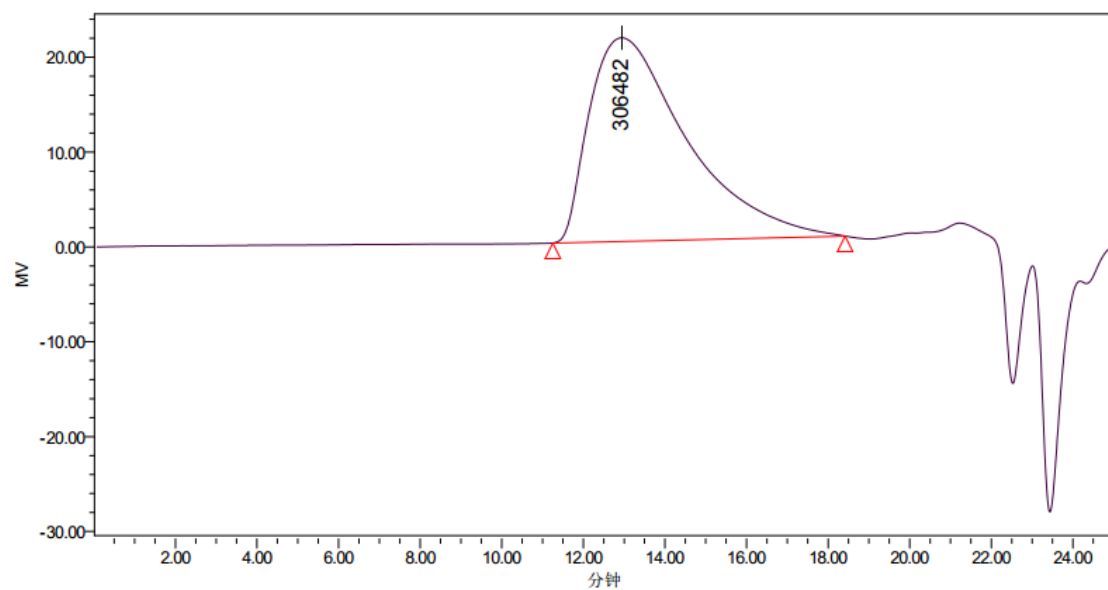

**GPC Results**

|   | Dist Name | Elution Volume (ml) | Retention Time (min) | Adjusted RT (min) | Mn    | Mw     | MP     | Mz     | Mz+1    | Mz/Mw    |
|---|-----------|---------------------|----------------------|-------------------|-------|--------|--------|--------|---------|----------|
| 1 |           | 12.944              | 12.944               | 12.944            | 62817 | 335375 | 306482 | 961135 | 1642924 | 2.865851 |

**Figure S94.** GPC curve of poly(IPI-co-L-IMCl) in Table 2, entry 20.

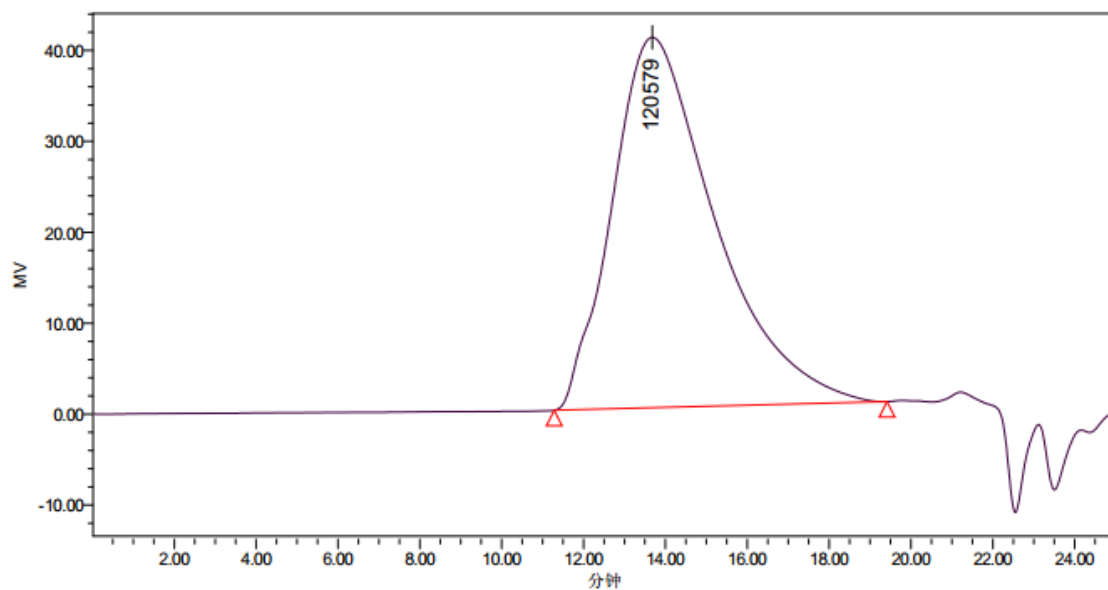

**GPC Results**

|   | Dist Name | Elution Volume (ml) | Retention Time (min) | Adjusted RT (min) | Mn    | Mw     | MP     | Mz     | Mz+1    | Mz/Mw    |
|---|-----------|---------------------|----------------------|-------------------|-------|--------|--------|--------|---------|----------|
| 1 |           | 13.681              | 13.681               | 13.681            | 40252 | 191238 | 120579 | 768139 | 1629575 | 4.016669 |

**Figure S95.** GPC curve of poly(IPD-co-D-IMCI) in Table 2, entry 21.

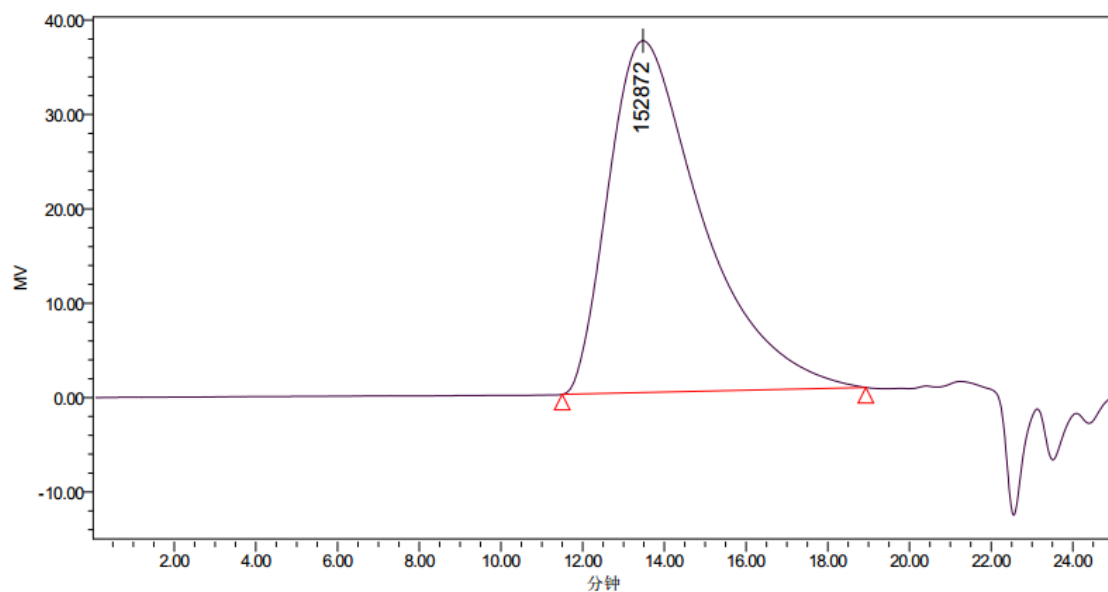

**GPC Results**

|   | Dist Name | Elution Volume (ml) | Retention Time (min) | Adjusted RT (min) | Mn    | Mw     | MP     | Mz     | Mz+1   | Mz/Mw    |
|---|-----------|---------------------|----------------------|-------------------|-------|--------|--------|--------|--------|----------|
| 1 |           | 13.478              | 13.478               | 13.478            | 46939 | 184787 | 152872 | 520335 | 977242 | 2.815864 |

**Figure S96.** GPC curve of poly(IPD-co-D-IMCI) in Table 2, entry 22.



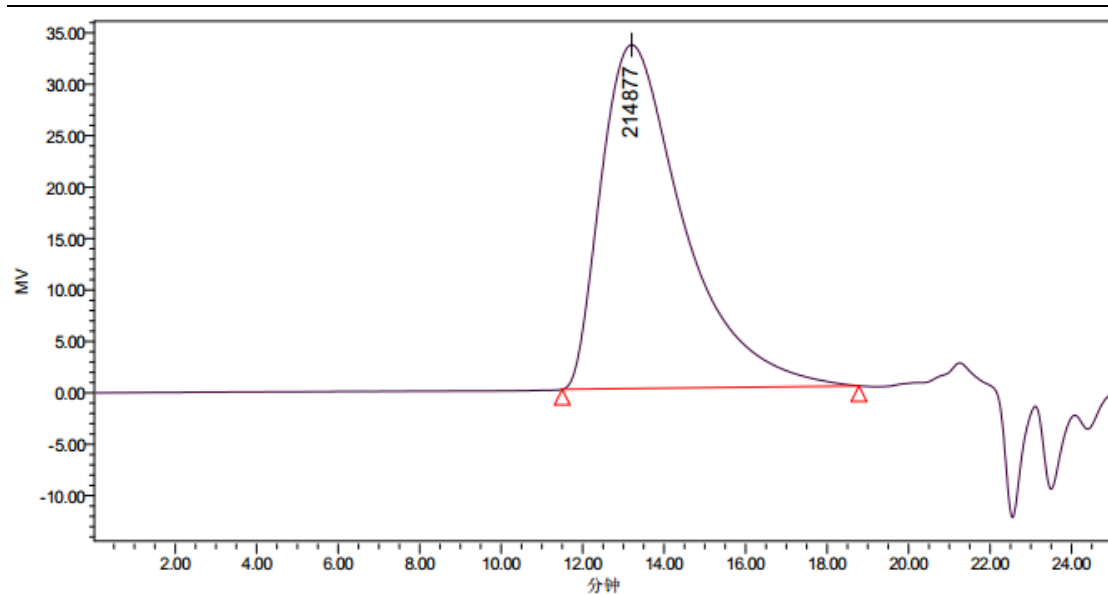

| GPC Results |           |                     |                      |                   |       |        |        |        |         |          |
|-------------|-----------|---------------------|----------------------|-------------------|-------|--------|--------|--------|---------|----------|
|             | Dist Name | Elution Volume (ml) | Retention Time (min) | Adjusted RT (min) | Mn    | Mw     | MP     | Mz     | Mz+1    | Mz/Mw    |
| 1           |           | 13.206              | 13.206               | 13.206            | 64713 | 242856 | 214877 | 590364 | 1008045 | 2.430916 |

Figure S97. GPC curve of poly(IPD-co-D-IMCI) in Table 2, entry 23.

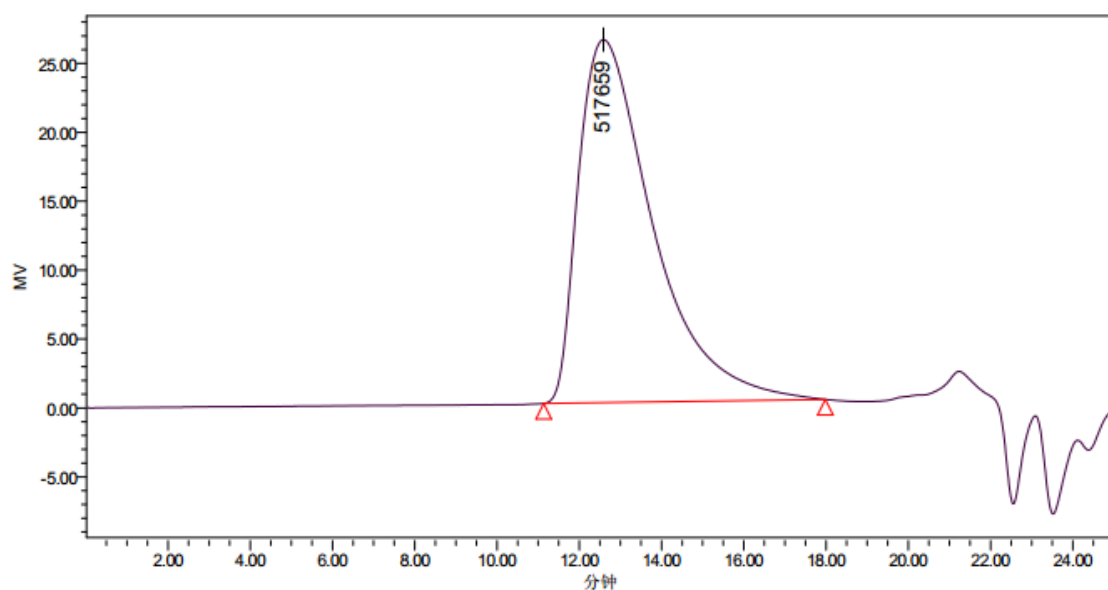

| GPC Results |           |                     |                      |                   |        |        |        |         |         |          |
|-------------|-----------|---------------------|----------------------|-------------------|--------|--------|--------|---------|---------|----------|
|             | Dist Name | Elution Volume (ml) | Retention Time (min) | Adjusted RT (min) | Mn     | Mw     | MP     | Mz      | Mz+1    | Mz/Mw    |
| 1           |           | 12.588              | 12.588               | 12.588            | 118282 | 505364 | 517659 | 1183279 | 1936776 | 2.341438 |

Figure S98. GPC curve of poly(IPD-co-D-IMCI) in Table 2, entry 24.

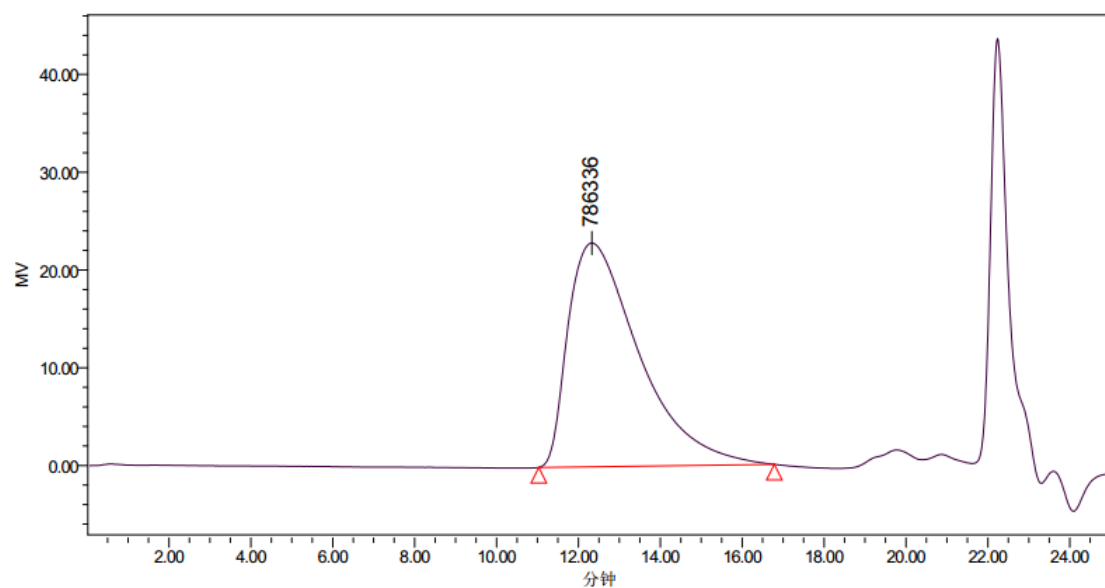

**GPC Results**

|   | Dist Name | Elution Volume (ml) | Retention Time (min) | Adjusted RT (min) | Mn     | Mw     | MP     | Mz      | Mz+1    | Mz/Mw    |
|---|-----------|---------------------|----------------------|-------------------|--------|--------|--------|---------|---------|----------|
| 1 |           | 12.327              | 12.327               | 12.327            | 181934 | 761048 | 786336 | 1784601 | 2853489 | 2.344926 |

**Figure S99.** GPC curve of poly(IPD-co-D-IMCI) in Table 2, entry 25.

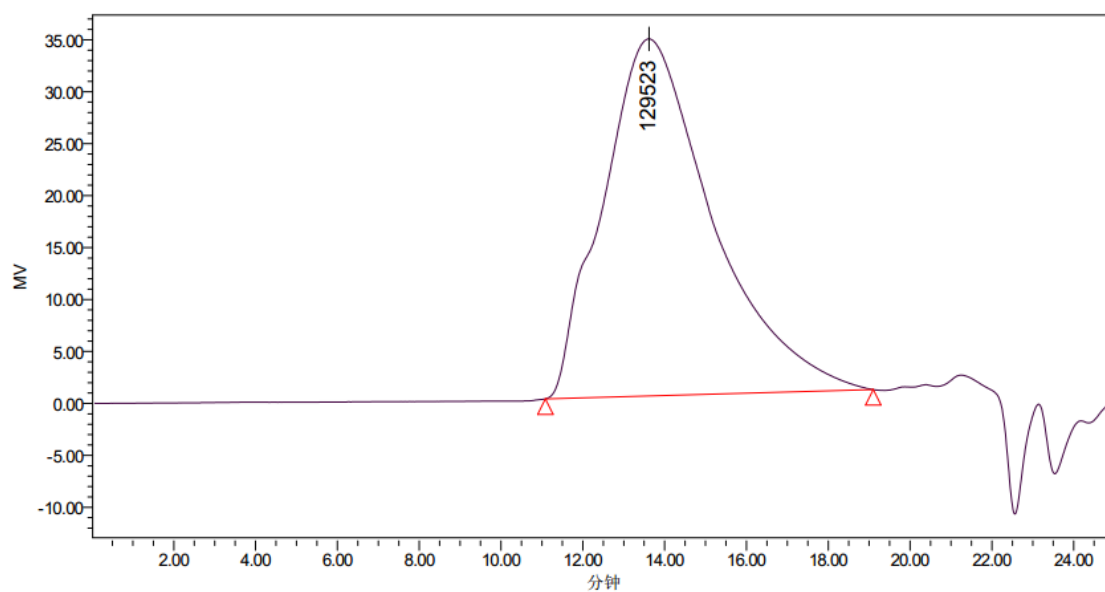

**GPC Results**

|   | Dist Name | Elution Volume (ml) | Retention Time (min) | Adjusted RT (min) | Mn    | Mw     | MP     | Mz      | Mz+1    | Mz/Mw    |
|---|-----------|---------------------|----------------------|-------------------|-------|--------|--------|---------|---------|----------|
| 1 |           | 13.619              | 13.619               | 13.619            | 42411 | 277289 | 129523 | 1300584 | 2570515 | 4.690356 |

**Figure S100.** GPC curve of poly(IPD-co-L-IMCI) in Table 2, entry 26.

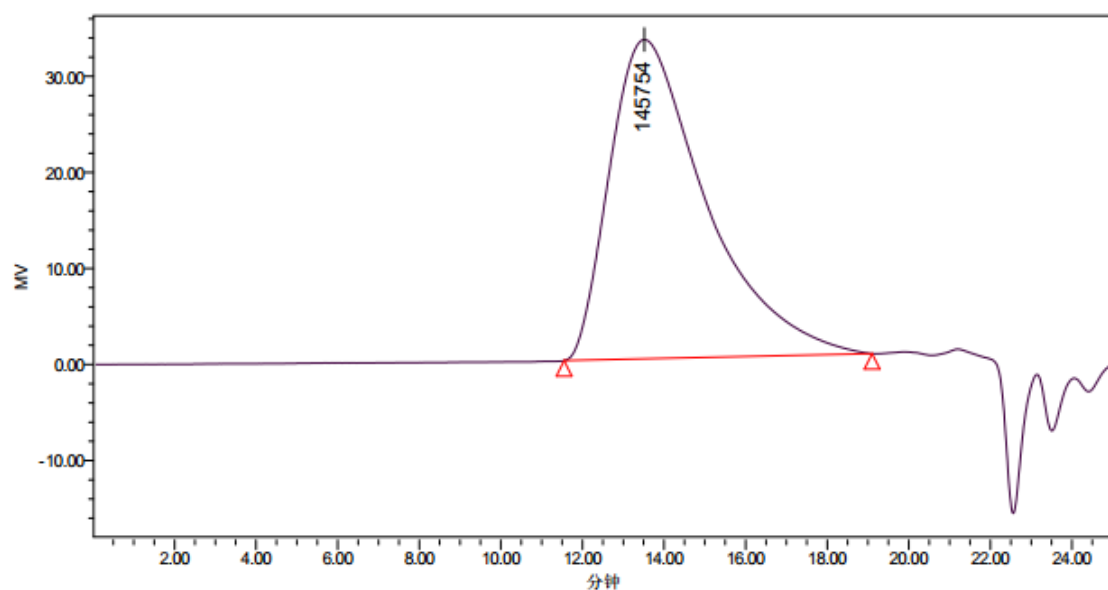

**GPC Results**

|   | Dist Name | Elution Volume (ml) | Retention Time (min) | Adjusted RT (min) | Mn    | Mw     | MP     | Mz     | Mz+1   | Mz/Mw    |
|---|-----------|---------------------|----------------------|-------------------|-------|--------|--------|--------|--------|----------|
| 1 |           | 13.518              | 13.518               | 13.518            | 42686 | 172601 | 145754 | 484901 | 901250 | 2.809378 |

**Figure S101.** GPC curve of poly(IPD-co-L-IMCI) in Table 2, entry 27.

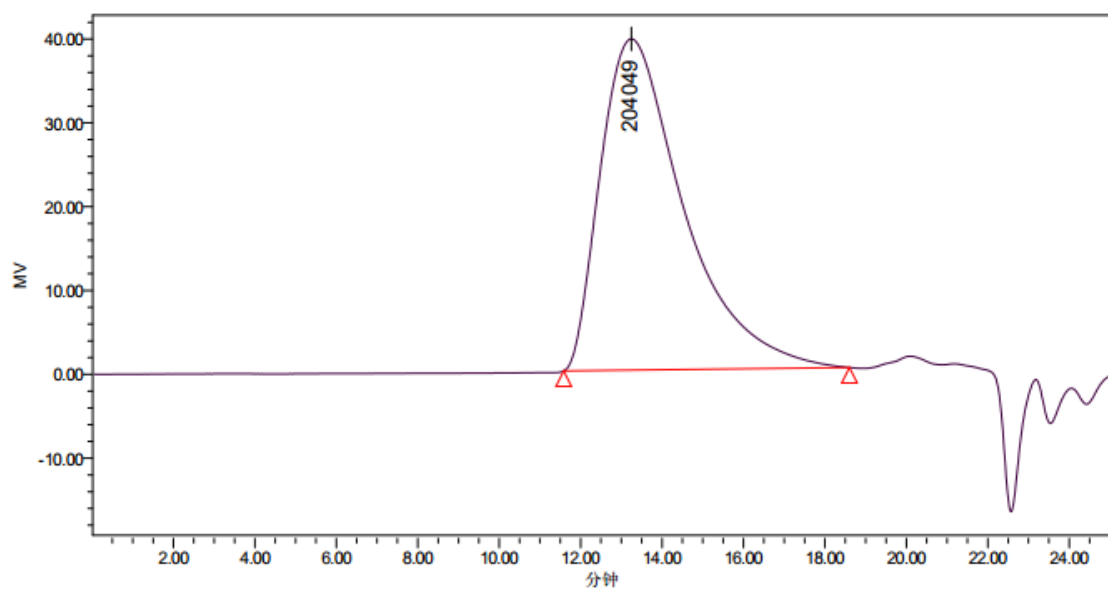

**GPC Results**

|   | Dist Name | Elution Volume (ml) | Retention Time (min) | Adjusted RT (min) | Mn    | Mw     | MP     | Mz     | Mz+1   | Mz/Mw    |
|---|-----------|---------------------|----------------------|-------------------|-------|--------|--------|--------|--------|----------|
| 1 |           | 13.246              | 13.246               | 13.246            | 64498 | 231587 | 204049 | 559001 | 943343 | 2.413789 |

**Figure S102.** GPC curve of poly(IPD-co-L-IMCI) in Table 2, entry 28.

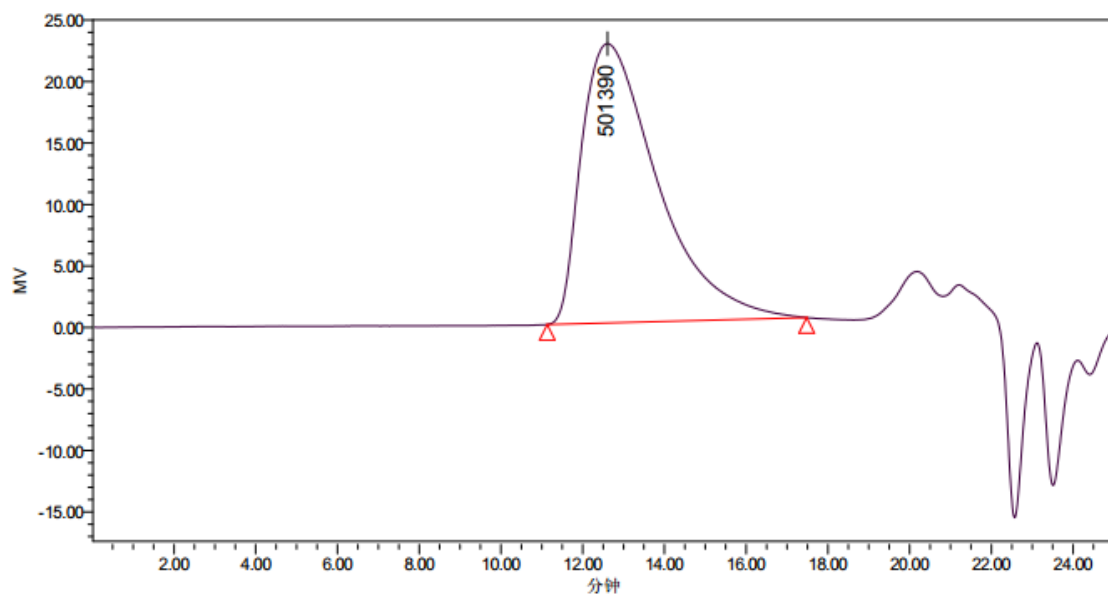

| GPC Results |           |                     |                      |                   |        |        |        |         |          |
|-------------|-----------|---------------------|----------------------|-------------------|--------|--------|--------|---------|----------|
|             | Dist Name | Elution Volume (ml) | Retention Time (min) | Adjusted RT (min) | Mn     | Mw     | MP     | Mz      | Mz+1     |
| 1           |           | 12.608              | 12.608               | 12.608            | 124265 | 508166 | 501390 | 1221604 | 2016399  |
|             |           |                     |                      |                   |        |        |        |         | 2.403946 |

Figure S103. GPC curve of poly(IPD-co-L-IMCI) in Table 2, entry 29.

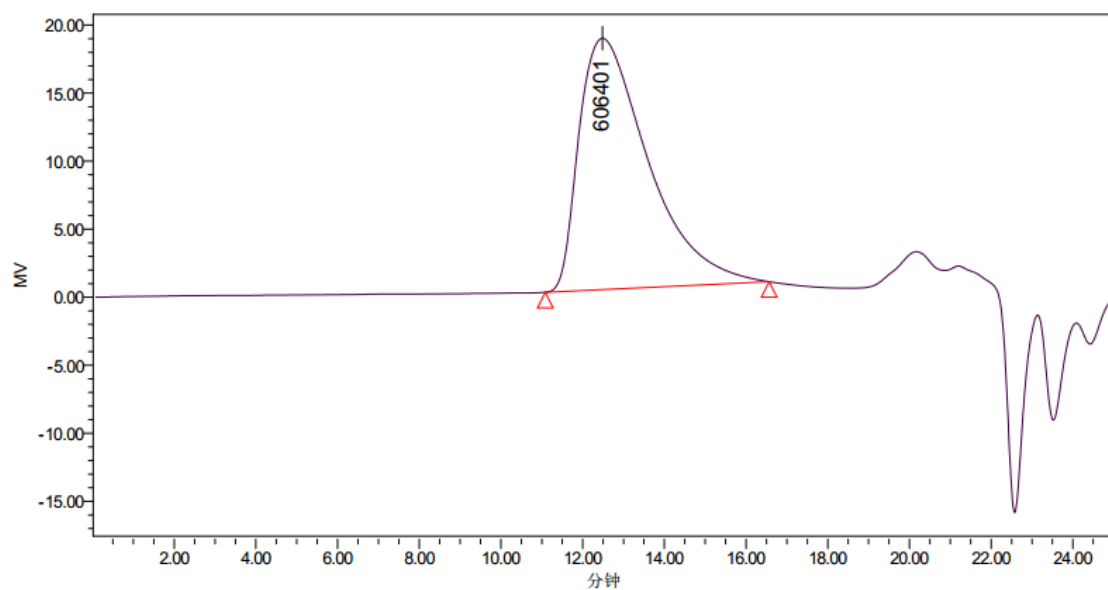

| GPC Results |           |                     |                      |                   |        |        |        |         |          |
|-------------|-----------|---------------------|----------------------|-------------------|--------|--------|--------|---------|----------|
|             | Dist Name | Elution Volume (ml) | Retention Time (min) | Adjusted RT (min) | Mn     | Mw     | MP     | Mz      | Mz+1     |
| 1           |           | 12.487              | 12.487               | 12.487            | 168382 | 588739 | 606401 | 1307287 | 2102271  |
|             |           |                     |                      |                   |        |        |        |         | 2.220489 |

Figure S104. GPC curve of poly(IPD-co-L-IMCI) in Table 2, entry 30.

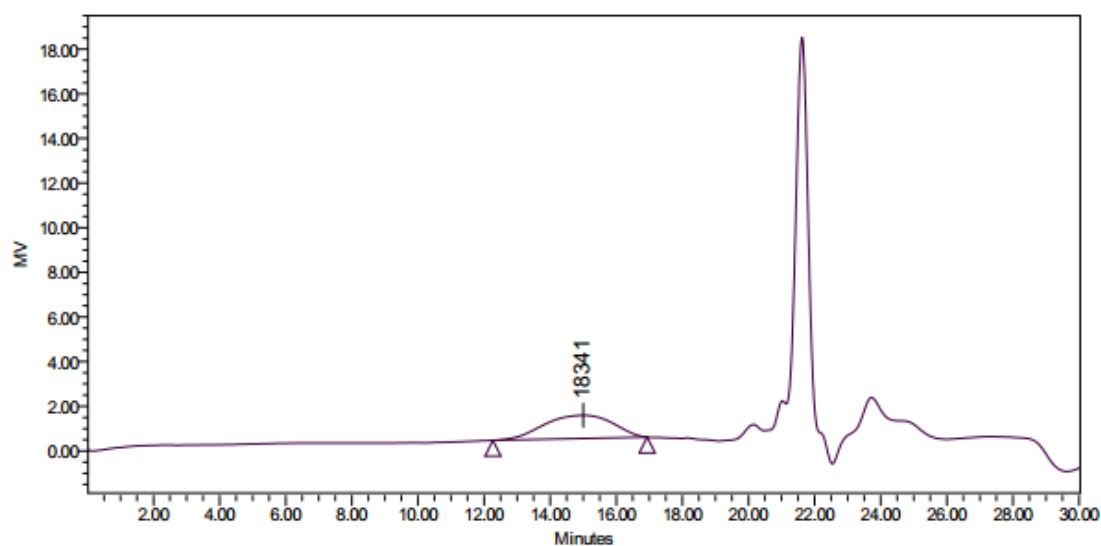

**Broad Unknown Modified Universal Peak Table**

|   | Distribution Name | Mv (Daltons) | K (dl/g) | alpha | Intrinsic Viscosity (dl/g) | Mn (Daltons) | Mw (Daltons) | MP (Daltons) | Mz (Daltons) | Mz+1 (Daltons) | Polydispersity | Mz/Mw    |
|---|-------------------|--------------|----------|-------|----------------------------|--------------|--------------|--------------|--------------|----------------|----------------|----------|
| 1 |                   |              |          |       |                            | 15425        | 32855        | 18341        | 65973        | 108300         | 2.129983       | 2.008036 |

**Figure S105.** GPC curve of poly(EPI-co-L-IMCI) in Table 2, entry 31.

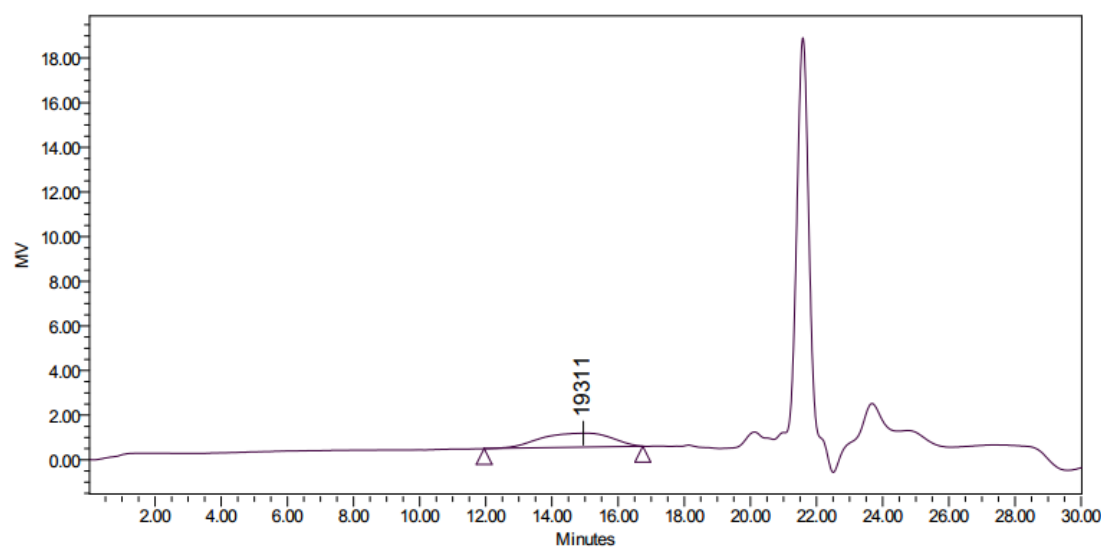

**Broad Unknown Modified Universal Peak Table**

|   | Distribution Name | Mv (Daltons) | K (dl/g) | alpha | Intrinsic Viscosity (dl/g) | Mn (Daltons) | Mw (Daltons) | MP (Daltons) | Mz (Daltons) | Mz+1 (Daltons) | Polydispersity | Mz/Mw    |
|---|-------------------|--------------|----------|-------|----------------------------|--------------|--------------|--------------|--------------|----------------|----------------|----------|
| 1 |                   |              |          |       |                            | 17947        | 38647        | 19311        | 77828        | 127768         | 2.153456       | 2.013807 |

**Figure S106.** GPC curve of poly(EPI-co-L-IMCI) in Table 2, entry 32.

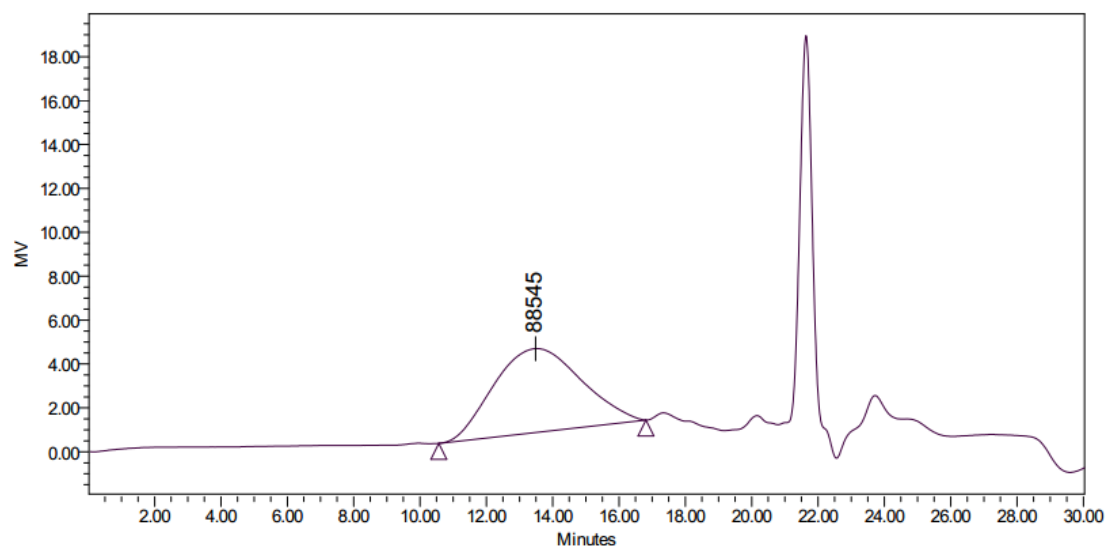

**Broad Unknown Modified Universal Peak Table**

|   | Distribution Name | Mv (Daltons) | K (dl/g) | alpha | Intrinsic Viscosity (dl/g) | Mn (Daltons) | Mw (Daltons) | MP (Daltons) | Mz (Daltons) | Mz+1 (Daltons) | Polydispersity | Mz/Mw    |
|---|-------------------|--------------|----------|-------|----------------------------|--------------|--------------|--------------|--------------|----------------|----------------|----------|
| 1 |                   |              |          |       |                            | 39396        | 155353       | 88545        | 409819       | 699900         | 3.943318       | 2.637987 |

**Figure S107.** GPC curve of poly(EPI-co-L-IMCI) in Table 2, entry 33.

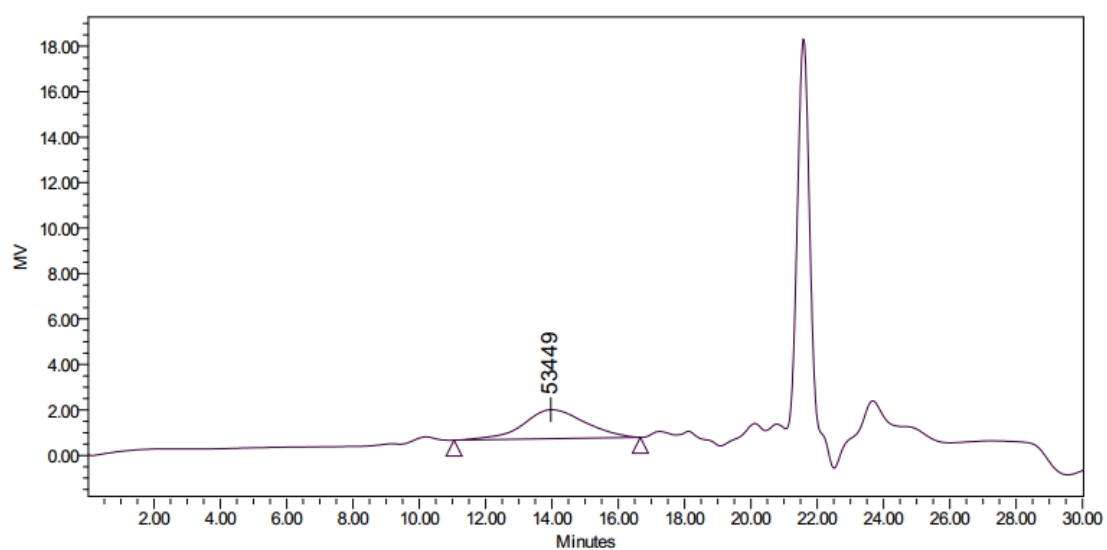

**Broad Unknown Modified Universal Peak Table**

|   | Distribution Name | Mv (Daltons) | K (dl/g) | alpha | Intrinsic Viscosity (dl/g) | Mn (Daltons) | Mw (Daltons) | MP (Daltons) | Mz (Daltons) | Mz+1 (Daltons) | Polydispersity | Mz/Mw    |
|---|-------------------|--------------|----------|-------|----------------------------|--------------|--------------|--------------|--------------|----------------|----------------|----------|
| 1 |                   |              |          |       |                            | 31168        | 75725        | 53449        | 199885       | 423798         | 2.429590       | 2.639631 |

**Figure S108.** GPC curve of poly(EPI-co-L-IMCI) in Table 2, entry 34.

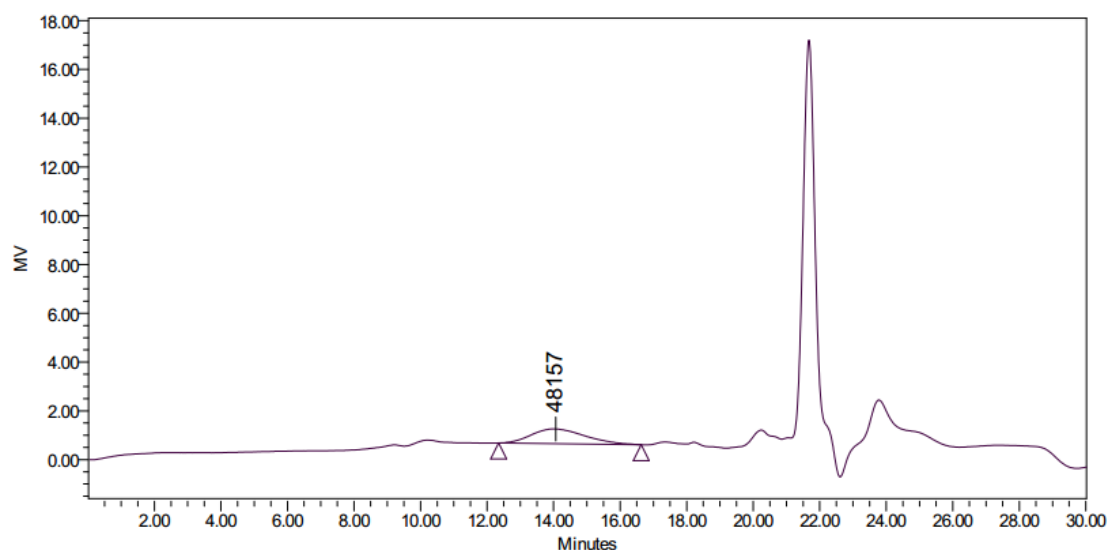

**Broad Unknown Modified Universal Peak Table**

|   | Distribution Name | Mv (Daltons) | K (dl/g) | alpha | Intrinsic Viscosity (dl/g) | Mn (Daltons) | Mw (Daltons) | MP (Daltons) | Mz (Daltons) | Mz+1 (Daltons) | Polydispersity | Mz/Mw    |
|---|-------------------|--------------|----------|-------|----------------------------|--------------|--------------|--------------|--------------|----------------|----------------|----------|
| 1 |                   |              |          |       |                            | 29753        | 53352        | 48157        | 82584        | 112598         | 1.793148       | 1.547908 |

**Figure S109.** GPC curve of poly(EPI-co-L-IMCI) in Table 2, entry 35.

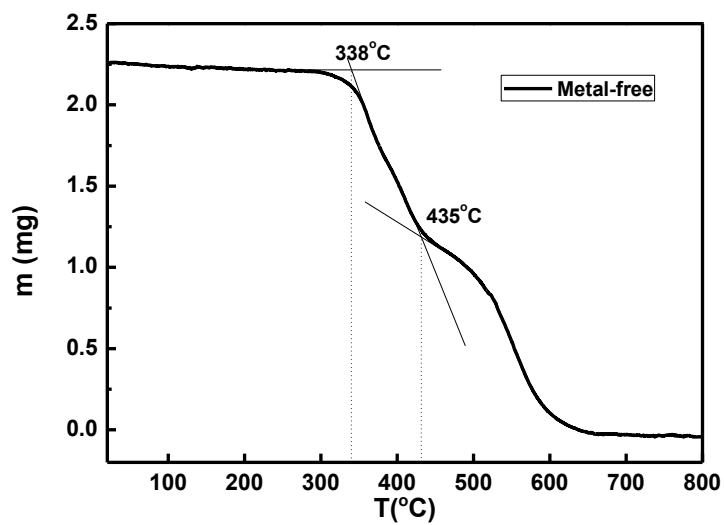

**Figure S110.** TGA spectrum of PEPI obtained by  $[(Et_3Si)_2H]^+[B(C_6F_5)_4]^-$  (Measure condition: Temperature range: 0-1000°C, Temp. Rate: 10 °C/min, Atmosphere: Air, Gas Flow: 50 [ml/min]).

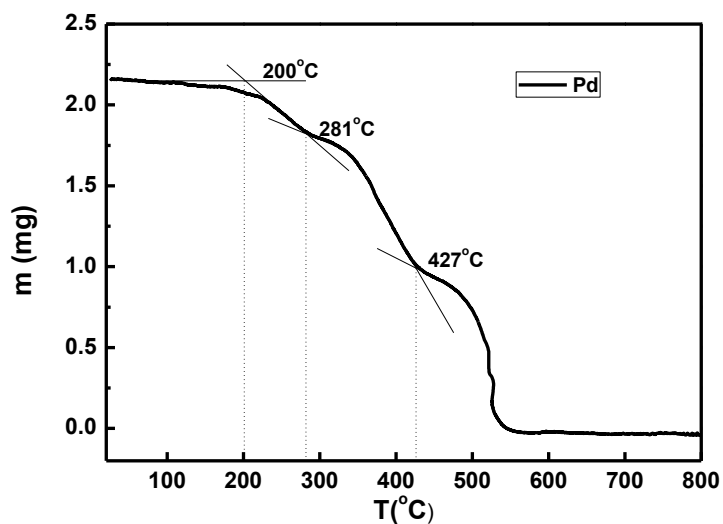

**Figure S111.** TGA spectrum of PEPI obtained by  $(\text{Et}_2\text{-(S,S)-BOZ})\text{PdC}\equiv\text{CC}_6\text{H}_5$  (Measure condition: Temperature range: 0-1000°C, Temp. Rate:10 °C/min, Atmosphere: Air, Gas Flow: 50 [ml/min]).

#### References

- 1 S. J. Connelly, W. Kaminsky and D. M. Heinekey, *Organometallics*, 2013, **32**, 7478-7481.
- 2 D. Minoo, C. A. Seyyedeh, A. N. Hamid and B. Ayoob, *Heterocycles*, 2008, **75**, 87-94.
- 3 Y. Motoyama, K. Morii, S. Ishizuka, S. Inomoto, Z. Zhang and S. H. Yoon, *ChemCatChem.*, 2018, **10**, 505-509.
- 4 X. He, Z. Zhao, L. H. Xiong, P. F. Gao, C. Peng, R. S. Li, Y. Xiong, Z. Li, H. Y. Sung and I. D. Williams, *J. Am. Chem. Soc.*, 2018, **140**, 6904-6911.
- 5 J. J. Pillai, A. Abbas, S. Narayanan, K. Sreekumar, C. S. Kartha and R. Joseph, *Polymer*, 2018, **137**, 330-337.
